# Supplementary material for: Regio- and diastereoselective construction of 1′,2′-(dihydrospiro[indoline-3,3′-pyrrol]-2′-yl)acrylates through phosphine-catalyzed [4 + 1] annulation of Morita–Baylis–Hillman carbonates with oxindole-derived α,β-unsaturated imines
Source: Royal Society of Chemistry journal article supplement (doi:10.1039/c5ra09147k), 2015-01-01
Supplement: c5ra09147k1.pdf [file c5ra09147k1.pdf]

## Supporting Information

### Regio- and Diastereoselective Construction of 1',2'-Dihydrospiro[indoline-3,3'-pyrrol]-2'-yl)acrylates through Phosphine-catalyzed [4+1] Annulation of Morita-Baylis-Hillman Carbonates with Oxindole-Derived $\alpha,\beta$ -Unsaturated Imines

Yu Lei,<sup>a</sup> Xiao-Nan Zhang,<sup>a</sup> Xue-Yan Yang,<sup>a</sup> Qin Xu<sup>\*a</sup> and Min Shi<sup>\*a,b</sup>

<sup>a</sup> Key Laboratory for Advanced Materials and Institute of Fine Chemicals, East China University of Science and Technology, 130 Meilong Road, Shanghai 200237, P. R. China.

<sup>b</sup> State Key Laboratory of Organometallic Chemistry, Shanghai Institute of Organic Chemistry, Chinese Academy of Sciences, 354 Fenglin Road, Shanghai 200032, P. R. China. E-mail: [mshi@mail.sioc.ac.cn](mailto:mshi@mail.sioc.ac.cn).

#### CONTENTS

|                                                                                                                                                                         |     |
|-------------------------------------------------------------------------------------------------------------------------------------------------------------------------|-----|
| 1. General Remarks.....                                                                                                                                                 | S2  |
| 2. General Procedure for the Synthesis of Oxindole-Derived $\alpha,\beta$ -Unsaturated Imines and Spectroscopic Data of the Products.....                               | S3  |
| 3. General Procedure for the [4+1] Annulations of $\alpha,\beta$ -Unsaturated ketones <b>1</b> with MBH Carbonates <b>2</b> and Spectroscopic Data of the Products..... | S30 |
| 4. X-ray Data of Products <b>3t</b> and <b>3u</b> .....                                                                                                                 | S60 |
| 5. Synthesis of Chiral Organophosphane Catalyst <b>CP</b> .....                                                                                                         | S62 |
| 6. Copies of Chiral HPLC Data of Product <b>3a</b> .....                                                                                                                | S64 |
| 7. Reference.....                                                                                                                                                       | S66 |

## 1. General Remarks:

Melting points were determined on a digital melting point apparatus and temperatures were uncorrected. Optical rotations were determined at 589 nm (sodium D line) by using a Perkin-Elmer-341 MC digital polarimeter;  $[\alpha]_D$ -values are given in unit of  $10 \text{ deg}^{-1} \text{ cm}^2 \text{ g}^{-1}$ .  $^1\text{H}$  NMR spectra were recorded on a Varian Mercury-300 and 400 spectrometer for solution in  $\text{CDCl}_3$  with tetramethylsilane (TMS) as an internal standard; coupling constants  $J$  are given in Hz.  $^{13}\text{C}$  NMR spectra were recorded on a Varian Mercury-300 and 400 spectrophotometers (75 or 100 MHz) with complete proton decoupling spectrophotometers ( $\text{CDCl}_3$ : 77.0 ppm). Infrared spectra were recorded on a Perkin-Elmer PE-983 spectrometer with absorption in  $\text{cm}^{-1}$ . Flash column chromatography was performed using 300-400 mesh silica gel. For thin-layer chromatography (TLC), silica gel plates (Huanghai GF254) were used. Chiral HPLC was performed on a SHIMADZU SPD-10A *vp* series with chiral columns (Chiralpak AD-H, OD-H, and IC columns  $4.6 \times 250 \text{ mm}$ , (Daicel Chemical Ind., Ltd.)) and chiral column (Phenomenex Lux  $5\mu$  Amylose-2 column  $4.6 \times 250 \text{ mm}$  (PA-2), Phenomenex Lux  $5\mu$  Cellulose-2 column  $4.6 \times 250 \text{ mm}$  (PC-2), (Phenomenex Ind., Ltd.)). Mass spectra were recorded by EI, ESI, MALDI and HRMS was measured on a HP-5989 instrument.

## 2. General Procedure for the Synthesis of Oxindole-Derived $\alpha,\beta$ -Unsaturated Imines and Spectroscopic Data of the Products.

Oxindole-derived  $\alpha,\beta$ -unsaturated imines **1** were prepared according to a previous procedure in the literature.<sup>1</sup>

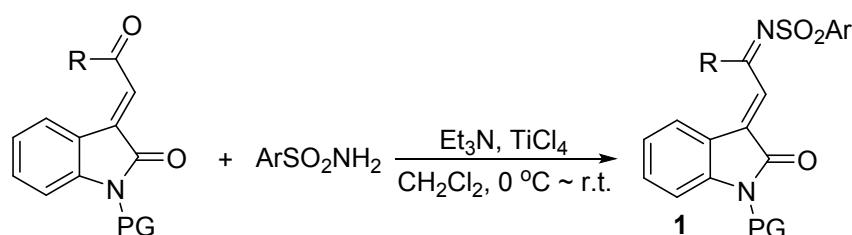

To a solution of oxindole-derived  $\alpha,\beta$ -unsaturated ketones (2.0 mmol) in dry  $\text{CH}_2\text{Cl}_2$  was added arylsulfonamide (2.0 mmol), triethylamine (4.0 mmol) and titanium tetrachloride (2.0 mmol) at 0 °C under argon, and the reaction mixture was stirred at room temperature for 12 h. The reaction was quenched by addition of brine. The aqueous phase was extracted with  $\text{CH}_2\text{Cl}_2$  and the combined organic layers were dried over anhydrous  $\text{MgSO}_4$  and concentrated in vacuo. Purification of the residue by column chromatography on silica gel gave the desired oxindole-derived  $\alpha,\beta$ -unsaturated imines **1a-1t**.

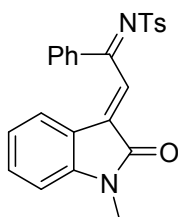

**Compound 1a:** A yellow solid, 400 mg, 48% yield; m.p. 98-99 °C;  $^1\text{H}$  NMR (400 MHz,  $\text{CDCl}_3$ , TMS):  $\delta$  2.35 (s, 3H,  $\text{CH}_3$ ), 3.26 (s, 3H,  $\text{CH}_3$ ), 6.68-6.72 (m, 2H, Ar), 6.74 (d, 1H,  $J = 7.6$  Hz, Ar), 7.18-7.22 (m, 3H, Ar), 7.40 (t, 2H,  $J = 7.6$  Hz, Ar), 7.57 (t, 1H,  $J = 7.6$  Hz, Ar), 7.70 (s, 1H, =CH), 7.82 (d, 2H,  $J = 7.6$  Hz, Ar), 8.00 (d, 2H,  $J = 7.6$  Hz, Ar);  $^{13}\text{C}$  NMR (100 MHz,  $\text{CDCl}_3$ , TMS):  $\delta$  21.5, 26.2, 108.2, 119.4, 122.3, 124.4, 127.8, 128.1, 129.1, 129.3, 129.7, 131.0, 131.5, 133.8, 134.5, 136.8, 144.1, 144.7, 166.0, 175.0; HRMS (ESI) Calcd. For  $\text{C}_{24}\text{H}_{21}\text{N}_2\text{O}_3\text{S}^+$  ( $\text{M}+\text{H}$ ) $^+$  requires 417.1273,

Found: 417.1265; IR (CH<sub>2</sub>Cl<sub>2</sub>):  $\nu$  684, 764, 773, 822, 1023, 1157, 1249, 1305, 1327, 1377, 1470, 1553, 1610, 1715, 2850, 2922 cm<sup>-1</sup>.

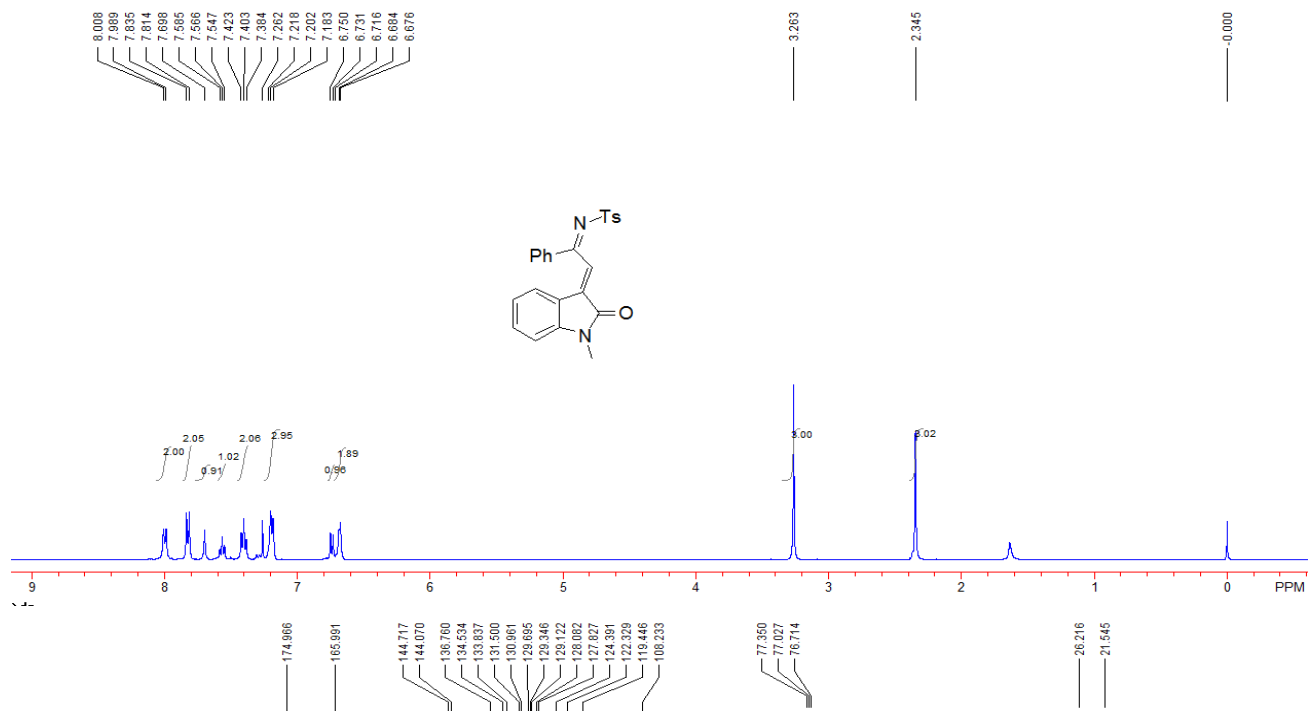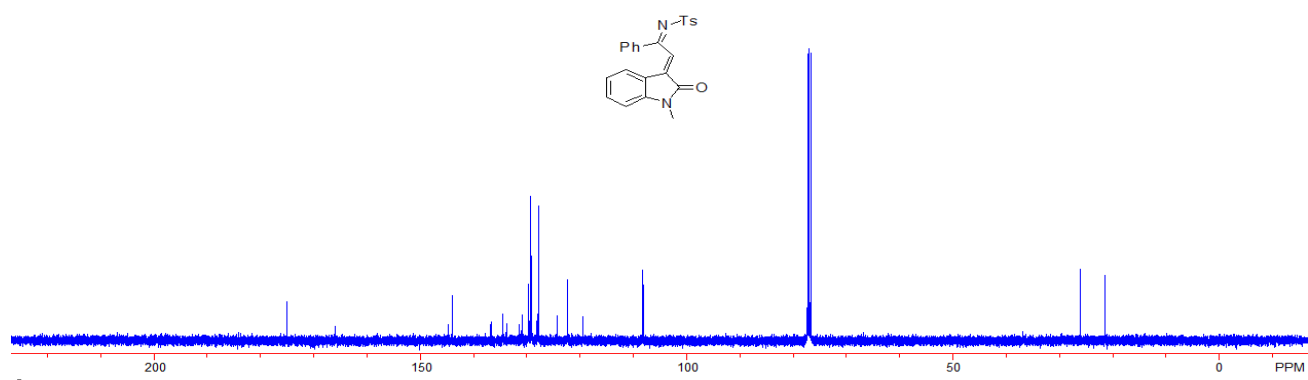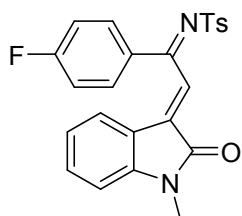

**Compound 1b:** A yellow solid, 408 mg, 47% yield; m.p. 169-170 °C; <sup>1</sup>H NMR (CDCl<sub>3</sub>, 400 MHz, TMS):  $\delta$  2.34 (s, 3H, CH<sub>3</sub>), 3.26 (s, 3H, CH<sub>3</sub>), 6.64-6.76 (m, 3H, Ar), 7.08 (t,  $J$  = 8.4 Hz, 2H, Ar), 7.17-7.23 (m, 3H, Ar), 7.67 (s, 1H, =CH), 7.81 (d,  $J$  = 8.0 Hz, 2H, Ar), 8.01-8.05 (m, 2H, Ar); <sup>13</sup>C

NMR (CDCl<sub>3</sub>, 100 MHz, TMS):  $\delta$  21.5, 26.2, 108.3, 116.5 (d,  $J = 22.0$  Hz), 119.2, 122.3, 124.3, 127.6, 127.8, 129.3, 130.0, 131.1, 131.6, 132.3 (d,  $J = 9.5$  Hz), 136.6, 144.1, 144.7, 165.8, 166.7 (d,  $J = 256.7$  Hz), 173.5; <sup>19</sup>F NMR (CDCl<sub>3</sub>, 376 MHz, CFC1<sub>3</sub>):  $\delta$  -102.09; HRMS (ESI) Calcd. For C<sub>24</sub>H<sub>23</sub>FN<sub>3</sub>O<sub>3</sub>S<sup>+</sup> (M+NH<sub>4</sub>)<sup>+</sup> requires 452.1439, Found: 452.1451; IR (CH<sub>2</sub>Cl<sub>2</sub>):  $\nu$  668, 764, 769, 851, 1089, 1151, 1241, 1327, 1376, 1469, 1552, 1610, 1715, 2933, 3058 cm<sup>-1</sup>.

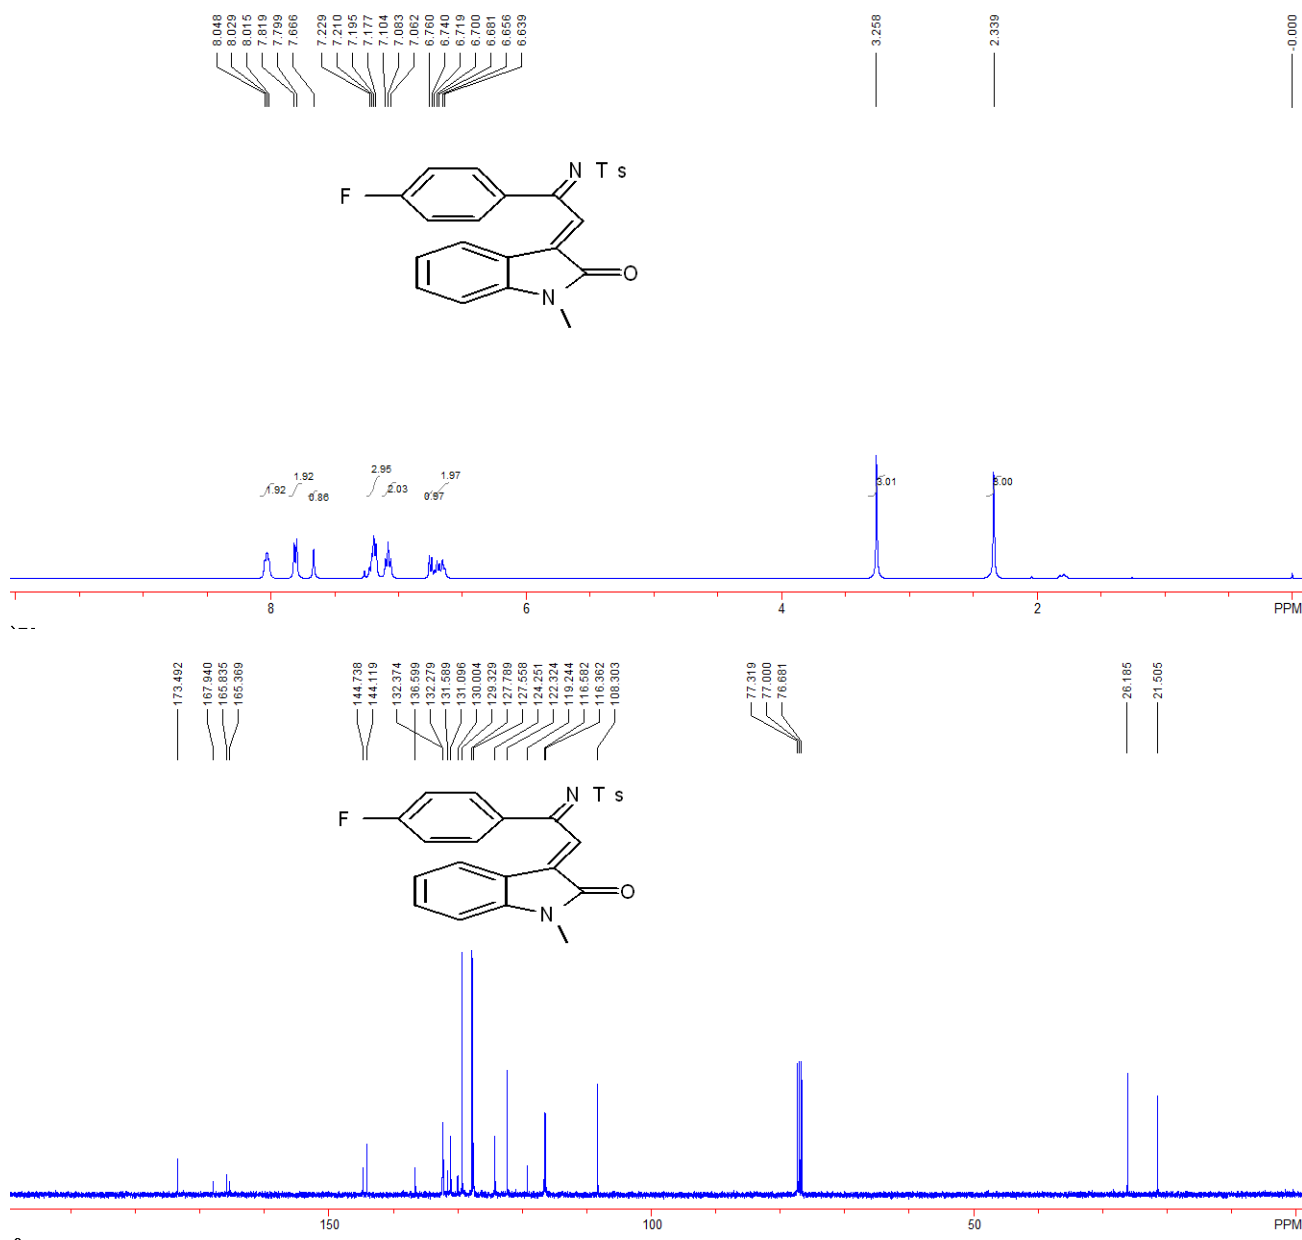

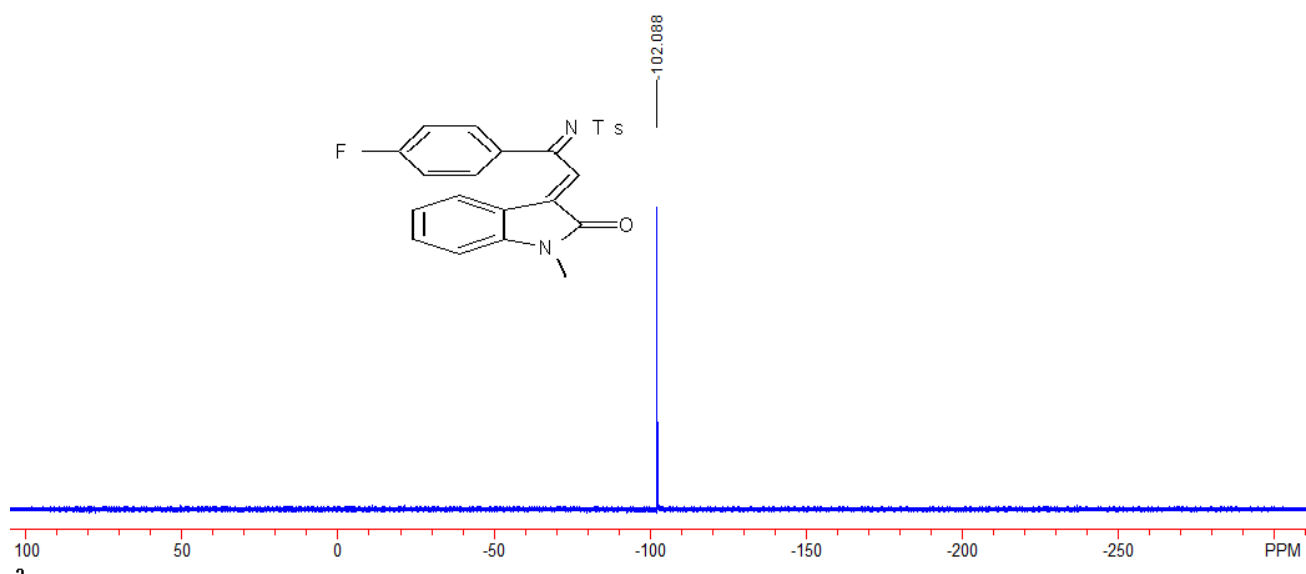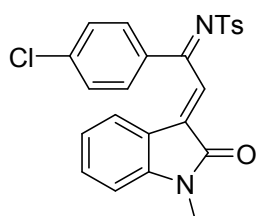

**Compound 1c:** A yellow solid, 459 mg, 51% yield; m.p. 173-174 °C;  $^1\text{H}$  NMR ( $\text{CDCl}_3$ , 400 MHz, TMS):  $\delta$  2.34 (s, 3H,  $\text{CH}_3$ ), 3.26 (s, 3H,  $\text{CH}_3$ ), 6.64 (d,  $J = 7.6$  Hz, 1H, Ar), 6.71 (t,  $J = 7.6$  Hz, 1H, Ar), 6.75 (d,  $J = 8.0$  Hz, 1H, Ar), 7.18-7.24 (m, 3H, Ar), 7.38 (d,  $J = 8.8$  Hz, 2H, Ar), 7.65 (s, 1H, =CH), 7.81 (d,  $J = 8.0$  Hz, 2H, Ar), 7.95 (d,  $J = 8.8$  Hz);  $^{13}\text{C}$  NMR ( $\text{CDCl}_3$ , 100 MHz, TMS):  $\delta$  21.5, 26.2, 108.3, 119.2, 122.4, 124.2, 126.4, 127.3, 127.8, 129.4, 129.5, 129.6, 130.9, 131.1, 131.7, 132.1, 136.4, 141.2, 144.2, 144.7, 165.8, 173.6; HRMS (ESI) Calcd. For  $\text{C}_{24}\text{H}_{23}\text{ClN}_3\text{O}_3\text{S}^+$  ( $\text{M}+\text{NH}_4$ ) $^+$  requires 468.1143, Found: 468.1148; IR ( $\text{CH}_2\text{Cl}_2$ ):  $\nu$  699, 729, 746, 776, 1012, 1089, 1158, 1331, 1469, 1577, 1610, 1715, 2919  $\text{cm}^{-1}$ .

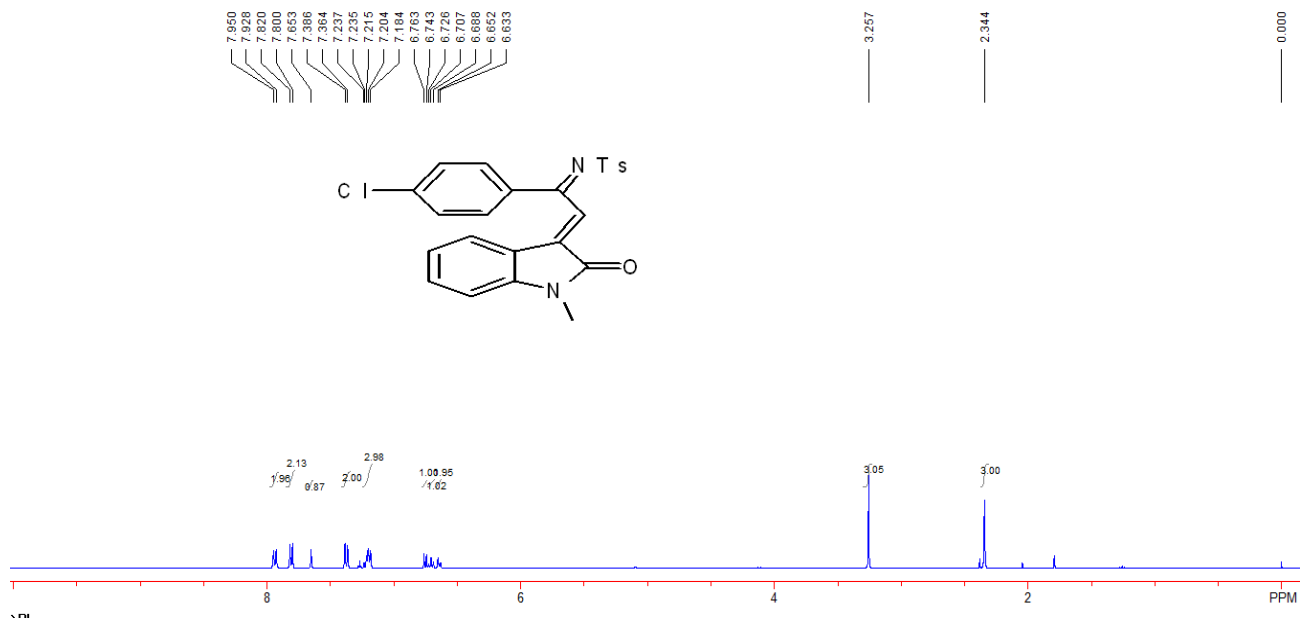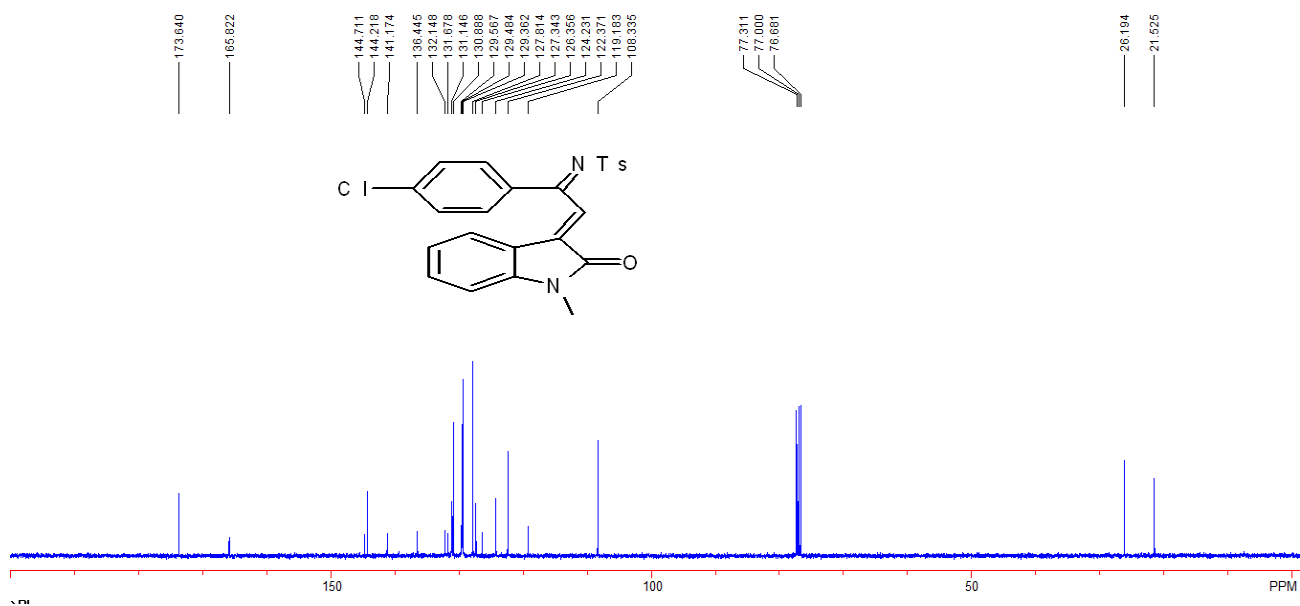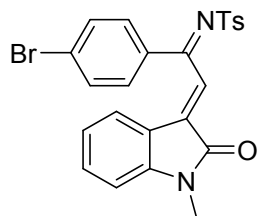

**Compound 1d:** A yellow solid, 523 mg, 53% yield; m.p. 185-186 °C; <sup>1</sup>H NMR (CDCl<sub>3</sub>, 400 MHz, TMS): δ 2.34 (s, 3H, CH<sub>3</sub>), 3.26 (s, 3H, CH<sub>3</sub>), 6.64 (d, *J* = 7.2 Hz, 1H, Ar), 6.71 (t, *J* = 7.6 Hz, 1H, Ar), 6.75 (d, *J* = 7.6 Hz, 1H, Ar), 7.18-7.24 (m, 3H, Ar), 7.54 (d, *J* = 8.4 Hz, 2H, Ar), 7.65 (s, 1H,

=CH), 7.81 (d,  $J = 8.0$  Hz, 2H, Ar), 7.86 (d,  $J = 8.4$  Hz);  $^{13}\text{C}$  NMR ( $\text{CDCl}_3$ , 100 MHz, TMS):  $\delta$  21.5, 26.2, 108.3, 119.2, 122.4, 124.2, 127.2, 127.8, 129.4, 130.0, 130.9, 131.2, 131.7, 132.5, 132.6, 136.4, 144.2, 144.7, 165.8, 173.8; HRMS (ESI) Calcd. For  $\text{C}_{24}\text{H}_{23}\text{BrN}_3\text{O}_3\text{S}^+$  ( $\text{M}+\text{NH}_4$ ) $^+$  requires 512.0638, Found: 512.0642; IR ( $\text{CH}_2\text{Cl}_2$ )  $\nu$  693, 745, 775, 818, 1008, 1089, 1158, 1329, 1469, 1542, 1610, 1713, 2926, 3054  $\text{cm}^{-1}$ .

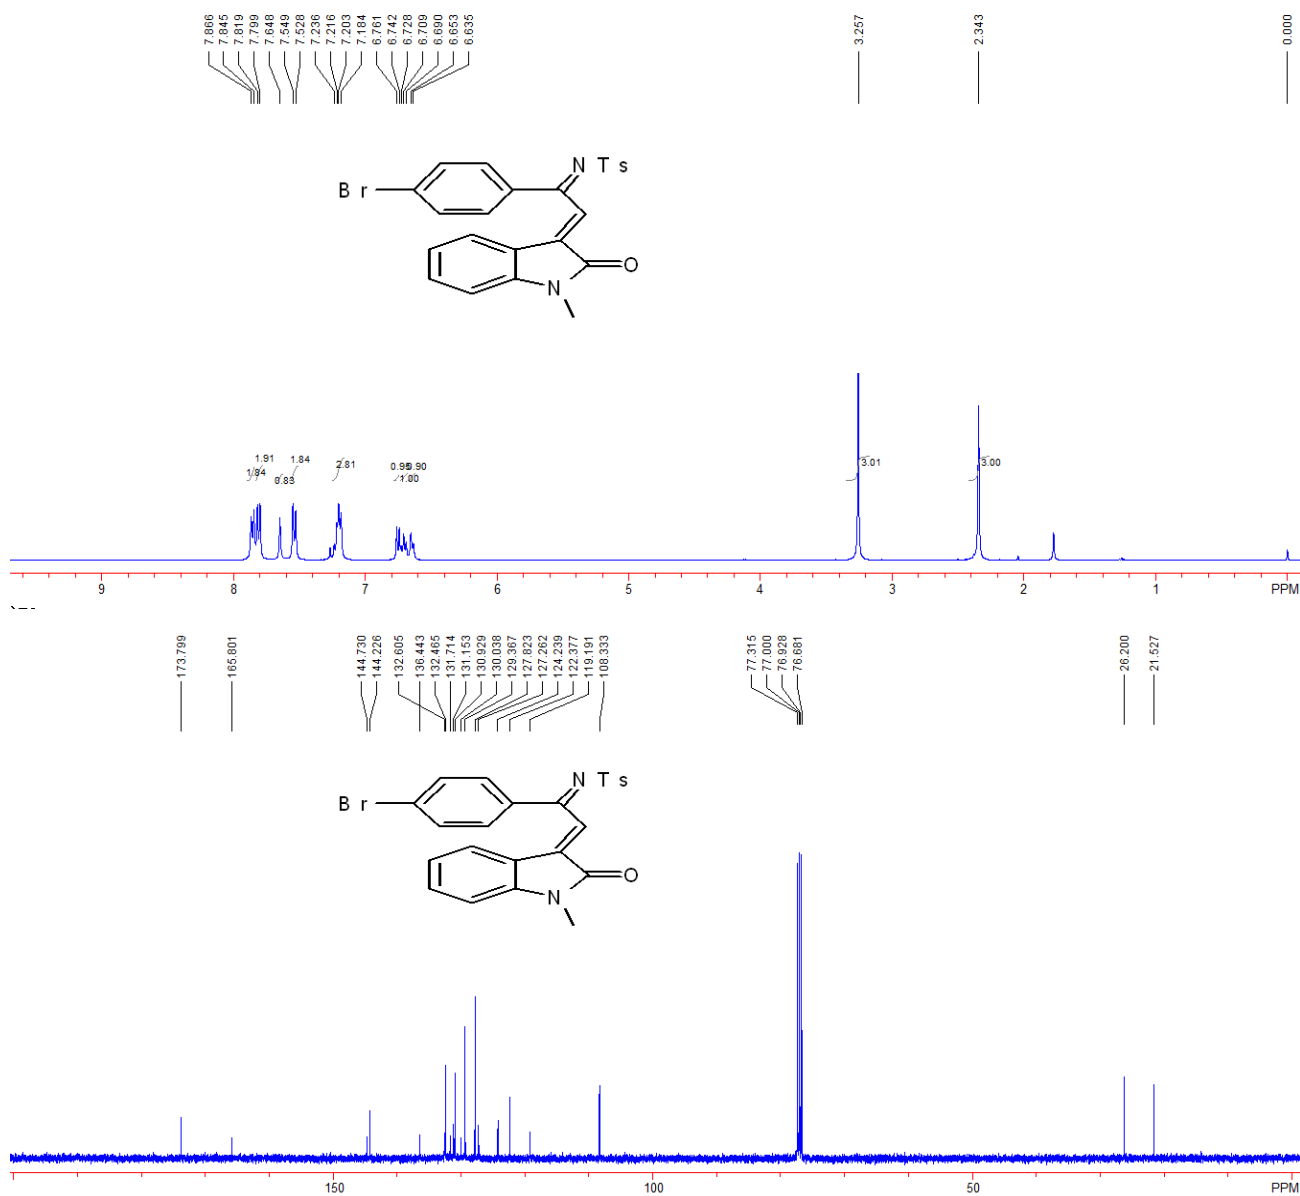



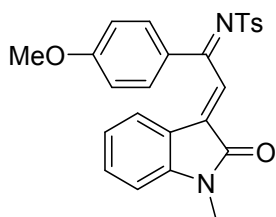

**Compound 1e:** A yellow solid, 410 mg, 46% yield; m.p. 188-189 °C;  $^1\text{H}$  NMR ( $\text{CDCl}_3$ , 400 MHz, TMS):  $\delta$  2.30 (s, 3H,  $\text{CH}_3$ ), 3.24 (s, 3H,  $\text{CH}_3$ ), 3.83 (s, 3H,  $\text{CH}_3$ ), 6.67 (t,  $J = 7.6$  Hz, 2H, Ar), 6.72 (d,  $J = 7.6$  Hz, 1H, Ar), 6.87 (d,  $J = 9.2$  Hz, 2H, Ar), 7.11-7.21 (m, 3H, Ar), 7.66 (s, 1H, =CH), 7.78 (d,  $J = 8.2$  Hz, 2H, Ar), 7.98 (d,  $J = 9.2$  Hz, 2H, Ar);  $^{13}\text{C}$  NMR ( $\text{CDCl}_3$ , 100 MHz, TMS):  $\delta$  21.4, 26.1, 55.5, 108.1, 114.5, 119.4, 122.2, 124.2, 126.1, 127.6, 128.4, 129.1, 130.7, 131.0, 132.1, 137.0, 143.7, 144.5, 165.0, 165.9, 174.2; HRMS (ESI) Calcd. For  $\text{C}_{25}\text{H}_{23}\text{N}_2\text{O}_4\text{S}^+$  ( $\text{M}+\text{H}$ ) $^+$  requires 447.1373, Found: 447.1379; IR ( $\text{CH}_2\text{Cl}_2$ )  $\nu$  746, 767, 823, 842, 1089, 1153, 1172, 1261, 1318, 1469, 1536, 1609, 1713, 2927, 3056  $\text{cm}^{-1}$ .

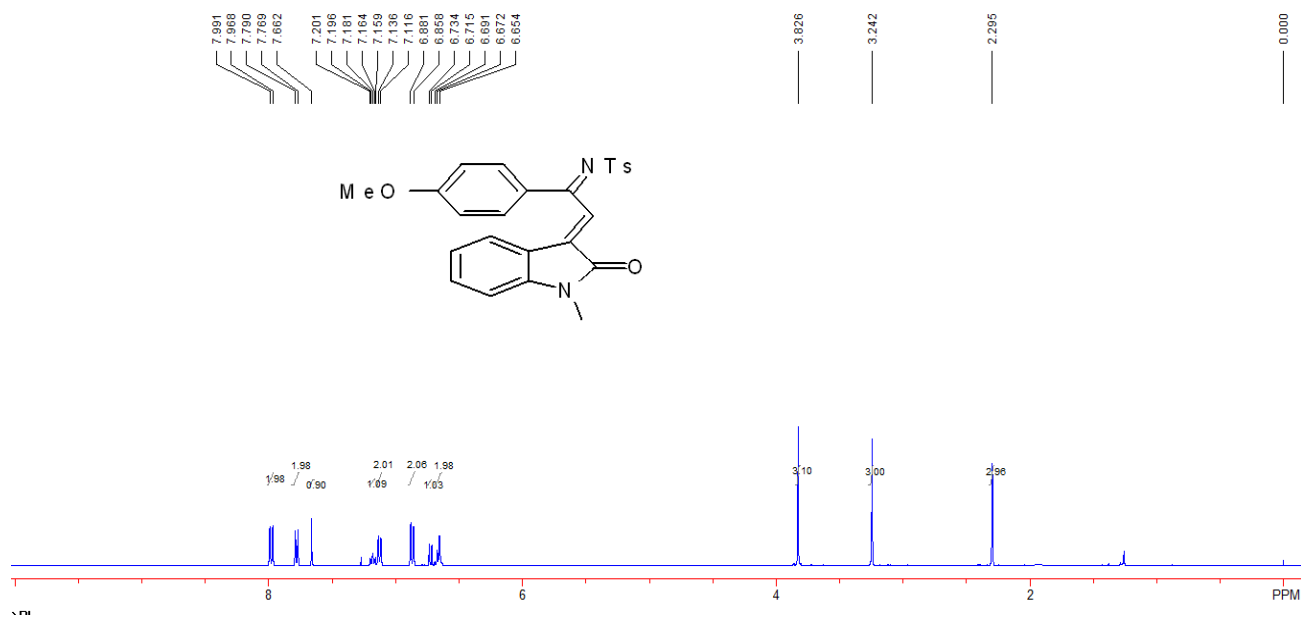

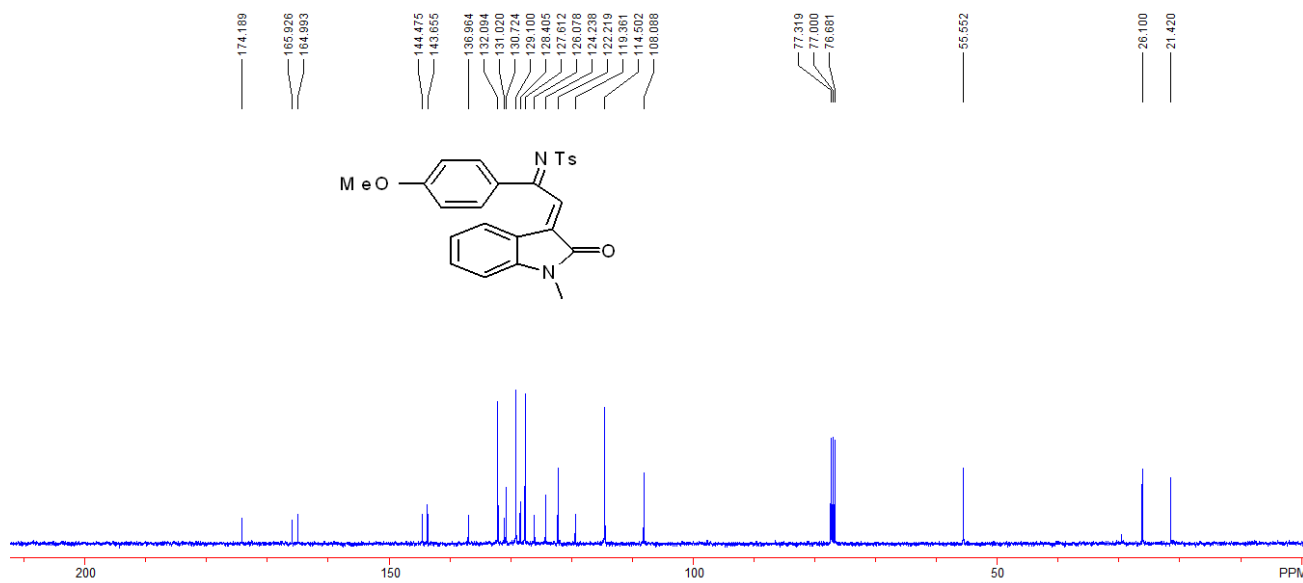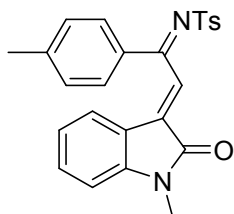

**Compound 1f:** A yellow solid, 361 mg, 42% yield; m.p. 178-179 °C;  $^1\text{H}$  NMR ( $\text{CDCl}_3$ , 400 MHz, TMS):  $\delta$  2.32 (s, 3H,  $\text{CH}_3$ ), 2.38 (s, 3H,  $\text{CH}_3$ ), 3.25 (s, 3H,  $\text{CH}_3$ ), 6.67 (d,  $J = 6.0$  Hz, 2H, Ar), 6.73 (d,  $J = 8.0$  Hz, 1H, Ar), 7.14-7.21 (m, 5H, Ar), 7.67 (s, 1H, =CH), 7.80 (d,  $J = 8.0$  Hz, 2H, Ar), 7.90 (d,  $J = 8.0$  Hz, 2H, Ar);  $^{13}\text{C}$  NMR ( $\text{CDCl}_3$ , 100 MHz, TMS):  $\delta$  21.5, 21.8, 26.2, 108.1, 119.4, 122.3, 124.3, 127.7, 128.3, 129.2, 129.8, 129.9, 130.8, 131.0, 131.2, 136.8, 143.9, 144.6, 146.0, 166.0, 174.9; HRMS (ESI) Calcd. For  $\text{C}_{25}\text{H}_{23}\text{N}_2\text{O}_3\text{S}^+$  ( $\text{M}+\text{H}$ ) $^+$  requires 431.1424, Found: 431.1427; IR ( $\text{CH}_2\text{Cl}_2$ ):  $\nu$  666, 746, 773, 814, 1089, 1158, 1332, 1469, 1544, 1609, 1701, 3259, 3348  $\text{cm}^{-1}$ .

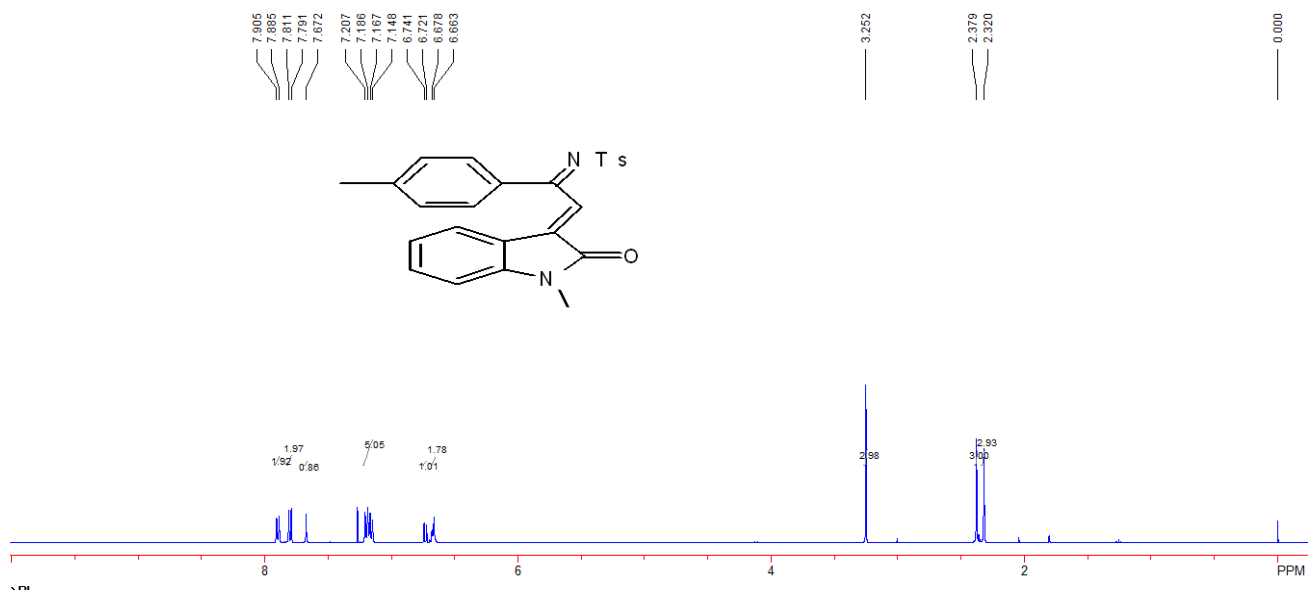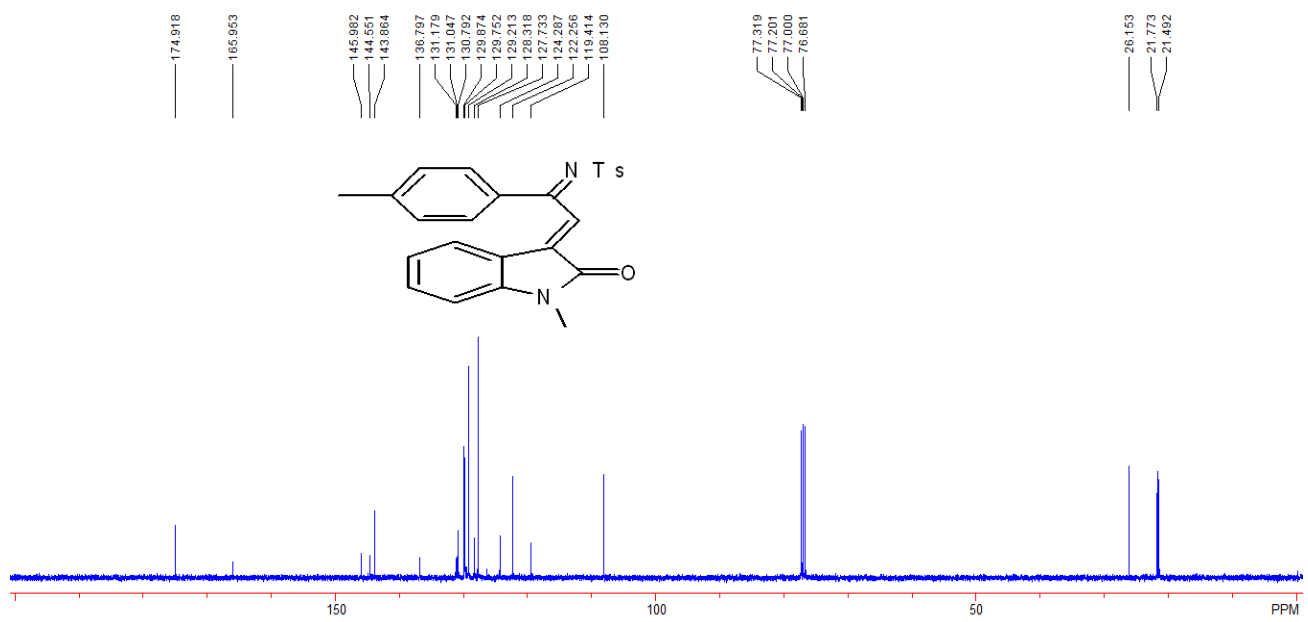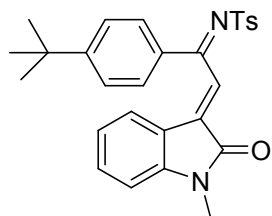

**Compound 1g:** A yellow solid, 349 mg, 37% yield; m.p. 180-181 °C; <sup>1</sup>H NMR (CDCl<sub>3</sub>, 400 MHz, TMS): δ 1.29 (s, 9H, CH<sub>3</sub>), 2.33 (s, 3H, CH<sub>3</sub>), 3.26 (s, 3H, CH<sub>3</sub>), 6.70 (d, *J* = 4.8 Hz, 2H, Ar), 6.74 (d, *J* = 8.0 Hz, 1H, Ar), 7.16 (d, *J* = 8.4 Hz, 2H, Ar), 7.20 (dd, *J*<sub>1</sub> = 8.4Hz, *J*<sub>2</sub> = 4.4Hz, 1H, Ar), 7.41

(d,  $J = 8.4$  Hz, 2H, Ar), 7.68 (s, 1H, =CH), 7.80 (d,  $J = 8.4$  Hz, 2H, Ar), 7.93 (d,  $J = 8.8$  Hz, 2H, Ar);  $^{13}\text{C}$  NMR ( $\text{CDCl}_3$ , 100 MHz, TMS):  $\delta$  21.5, 26.2, 30.9, 35.2, 108.1, 119.5, 122.3, 124.4, 126.1, 127.8, 128.5, 129.2, 129.6, 130.8, 131.0, 131.1, 136.9, 143.9, 144.6, 158.8, 166.0, 174.9; HRMS (ESI) Calcd. For  $\text{C}_{28}\text{H}_{29}\text{N}_2\text{O}_3\text{S}^+$  ( $\text{M}+\text{H}$ ) $^+$  requires 473.1893, Found: 473.1891; IR ( $\text{CH}_2\text{Cl}_2$ ):  $\nu$  746, 1090, 1159, 1332, 1376, 1469, 1542, 1574, 1610, 1716, 2926, 2955  $\text{cm}^{-1}$ .

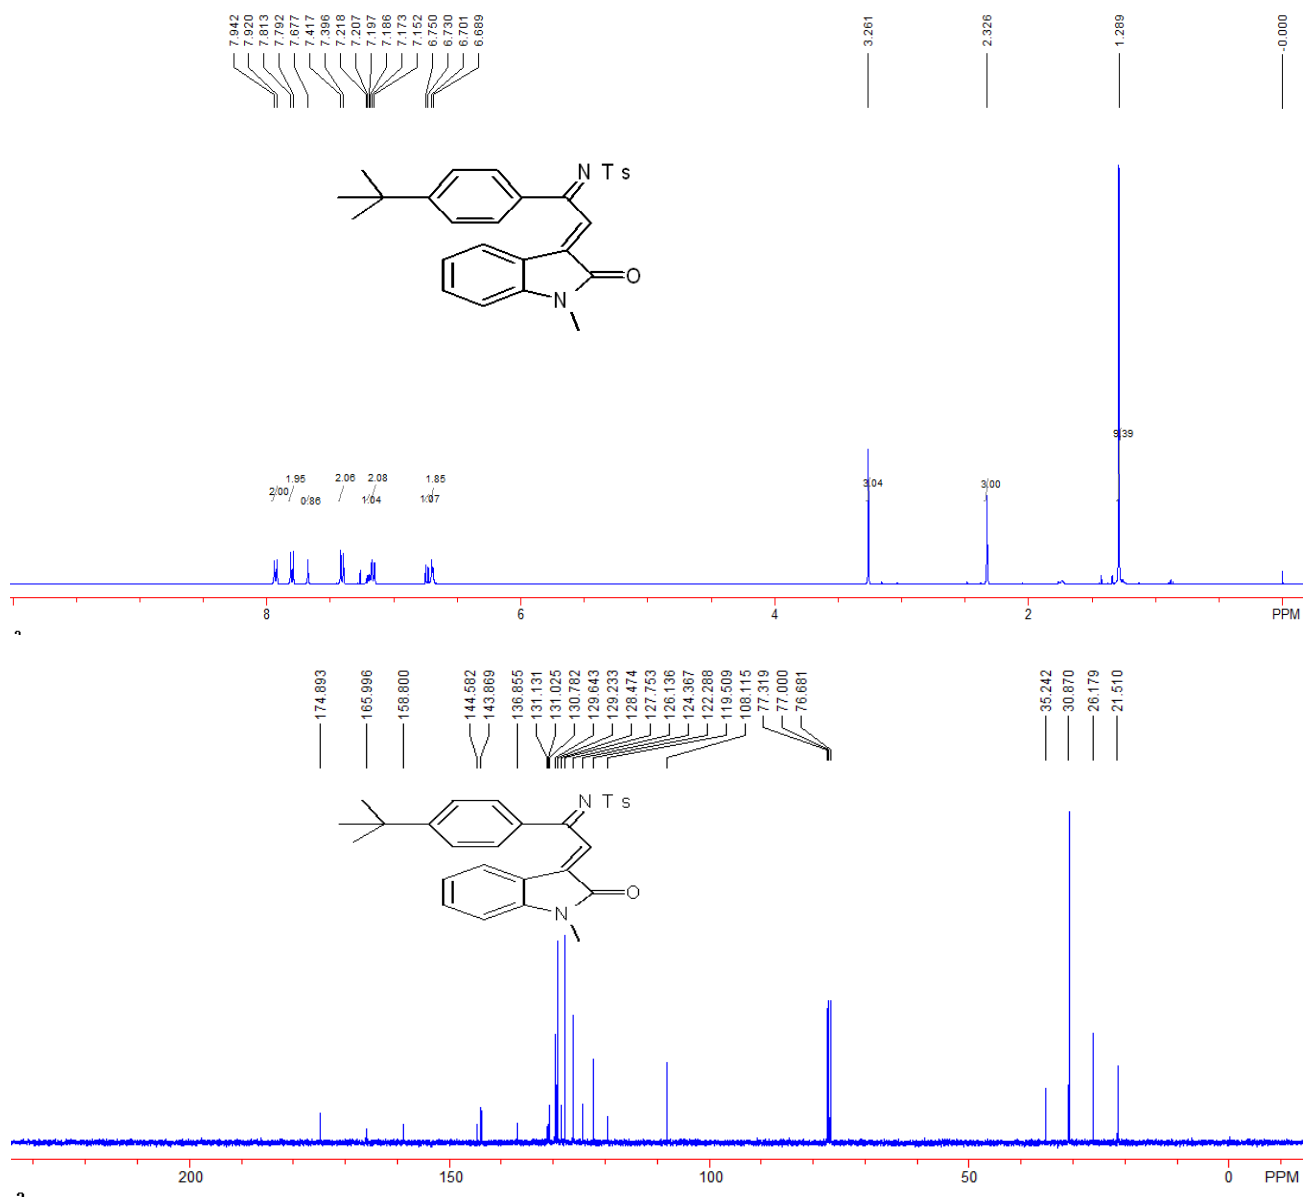

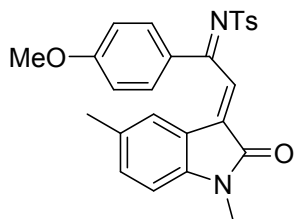

**Compound 1h:** A yellow solid, 377 mg, 41% yield; m.p. 192-193 °C;  $^1\text{H}$  NMR ( $\text{CDCl}_3$ , 400 MHz, TMS):  $\delta$  1.99 (s, 3H,  $\text{CH}_3$ ), 2.28 (s, 3H,  $\text{CH}_3$ ), 3.22 (s, 3H,  $\text{CH}_3$ ), 3.83 (s, 3H,  $\text{CH}_3$ ), 6.36 (s, 1H, Ar), 6.61 (d,  $J = 8.0$  Hz, 1H, Ar), 6.88 (d,  $J = 8.8$  Hz, 2H, Ar), 6.97 (d,  $J = 8.0$  Hz, 1H, Ar), 7.10 (d,  $J = 7.6$  Hz, 2H, Ar), 7.62 (s, 1H, =CH), 7.77 (d,  $J = 8.0$  Hz, 2H, Ar), 7.98 (d,  $J = 8.8$  Hz, 2H, Ar);  $^{13}\text{C}$  NMR ( $\text{CDCl}_3$ , 100 MHz, TMS):  $\delta$  20.7, 21.4, 26.1, 55.6, 107.8, 114.4, 119.4, 124.8, 126.2, 127.6, 128.1, 129.0, 131.1, 131.5, 132.1, 136.8, 142.2, 143.6, 165.0, 165.9, 174.6; HRMS (ESI) Calcd. For  $\text{C}_{26}\text{H}_{25}\text{N}_2\text{O}_4\text{S}^+$  ( $\text{M}+\text{H}$ ) $^+$  requires 461.1530, Found: 461.1535; IR ( $\text{CH}_2\text{Cl}_2$ ):  $\nu$  668, 735, 765, 807, 1015, 1089, 1155, 1171, 1259, 1319, 1533, 1710, 2922  $\text{cm}^{-1}$ .

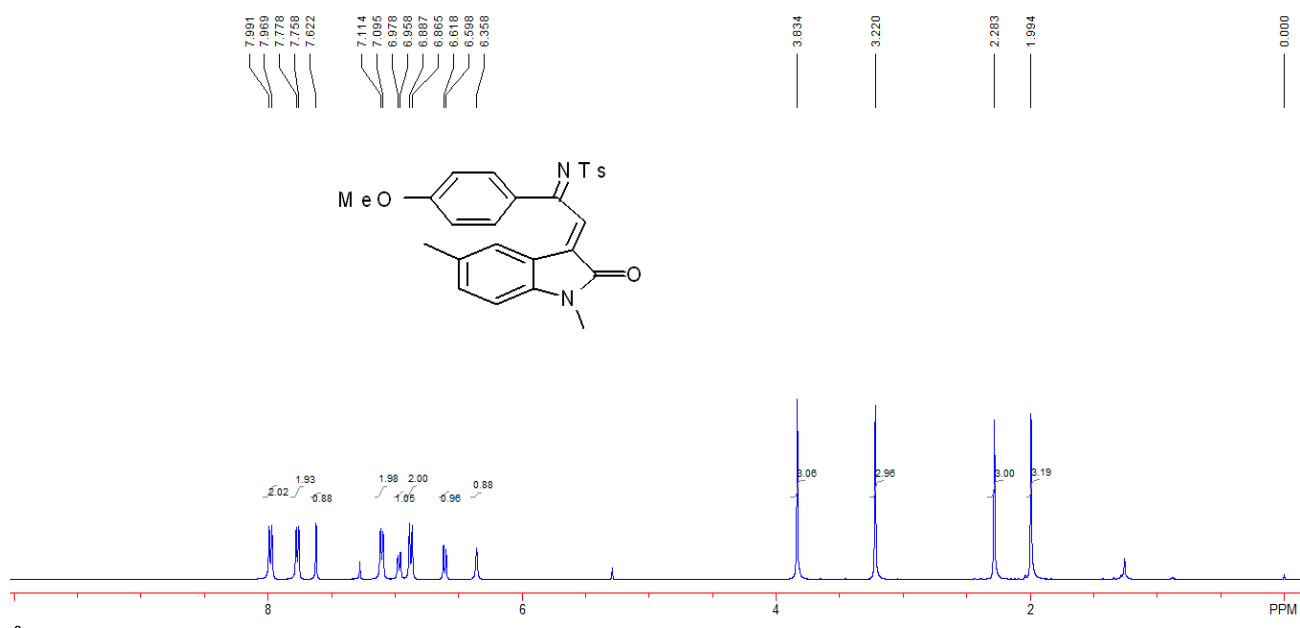

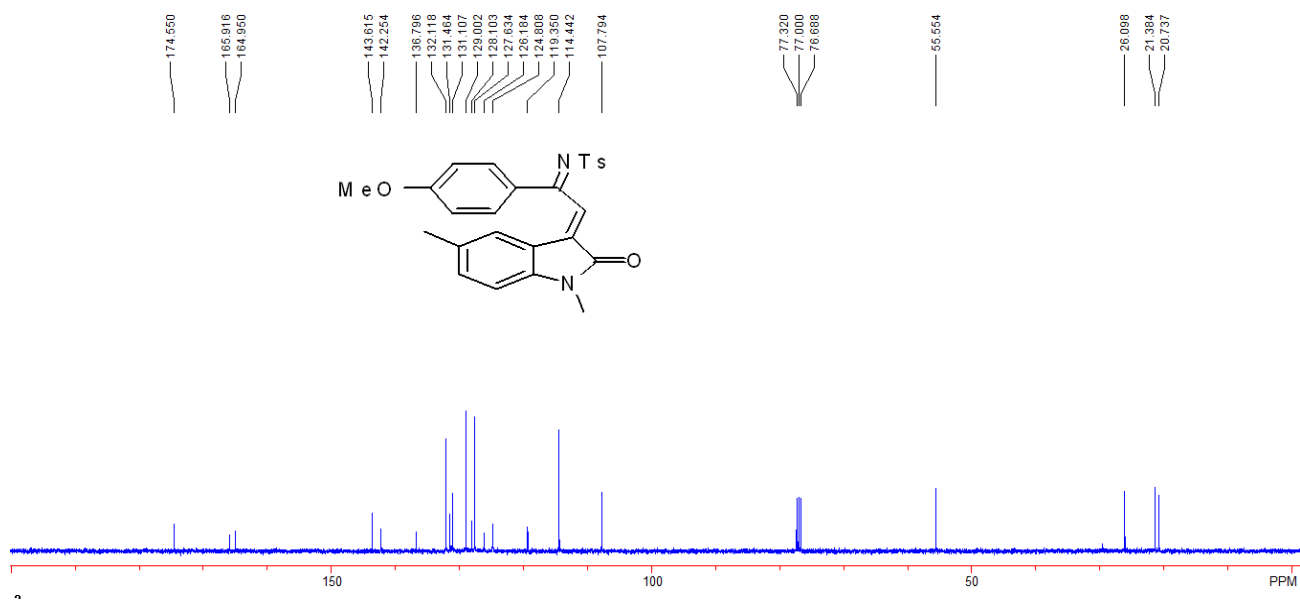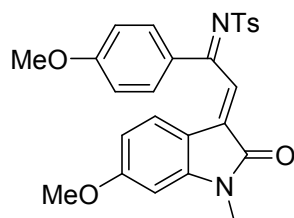

**Compound 1i:** A yellow solid, 428 mg, 45% yield; m.p. 201-202 °C;  $^1\text{H}$  NMR ( $\text{CDCl}_3$ , 400 MHz, TMS):  $\delta$  2.32 (s, 3H,  $\text{CH}_3$ ), 3.22 (s, 3H,  $\text{CH}_3$ ), 3.76 (s, 3H,  $\text{CH}_3$ ), 3.84 (s, 3H,  $\text{CH}_3$ ), 6.17 (dd,  $J_1 = 8.4$  Hz,  $J_2 = 2.0$  Hz, 1H, Ar), 6.28 (d,  $J = 2.0$  Hz, 1H, Ar), 6.54 (d,  $J = 8.4$  Hz, 1H, Ar), 6.87 (d,  $J = 8.8$  Hz, 2H, Ar), 7.15 (d,  $J = 8.0$  Hz, 2H, Ar), 7.49 (s, 1H, =CH), 7.79 (d,  $J = 8.0$  Hz, 2H, Ar), 7.97 (d,  $J = 9.2$  Hz, 2H, Ar);  $^{13}\text{C}$  NMR ( $\text{CDCl}_3$ , 100 MHz, TMS):  $\delta$  21.5, 26.1, 55.5, 55.6, 95.9, 106.3, 112.5, 114.0, 114.5, 125.1, 125.8, 126.5, 127.6, 127.7, 129.0, 129.1, 131.5, 132.2, 137.3, 143.6, 146.4, 162.3, 164.9, 166.8, 174.5; HRMS (ESI) Calcd. For  $\text{C}_{26}\text{H}_{25}\text{N}_2\text{O}_5\text{S}^+$  ( $\text{M}+\text{H}$ ) $^+$  requires 477.1479, Found: 477.1468; IR ( $\text{CH}_2\text{Cl}_2$ ):  $\nu$  668, 760, 801, 843, 1019, 1089, 1107, 1154, 1171, 1260, 1316, 1380, 1530, 1621, 1715, 2838, 2922  $\text{cm}^{-1}$ .

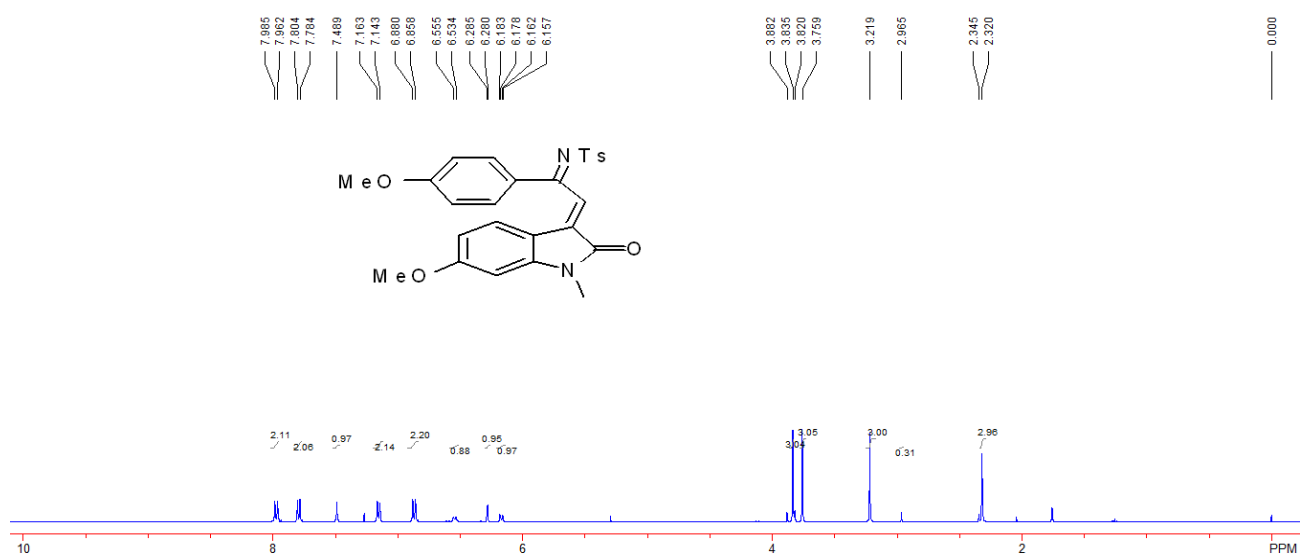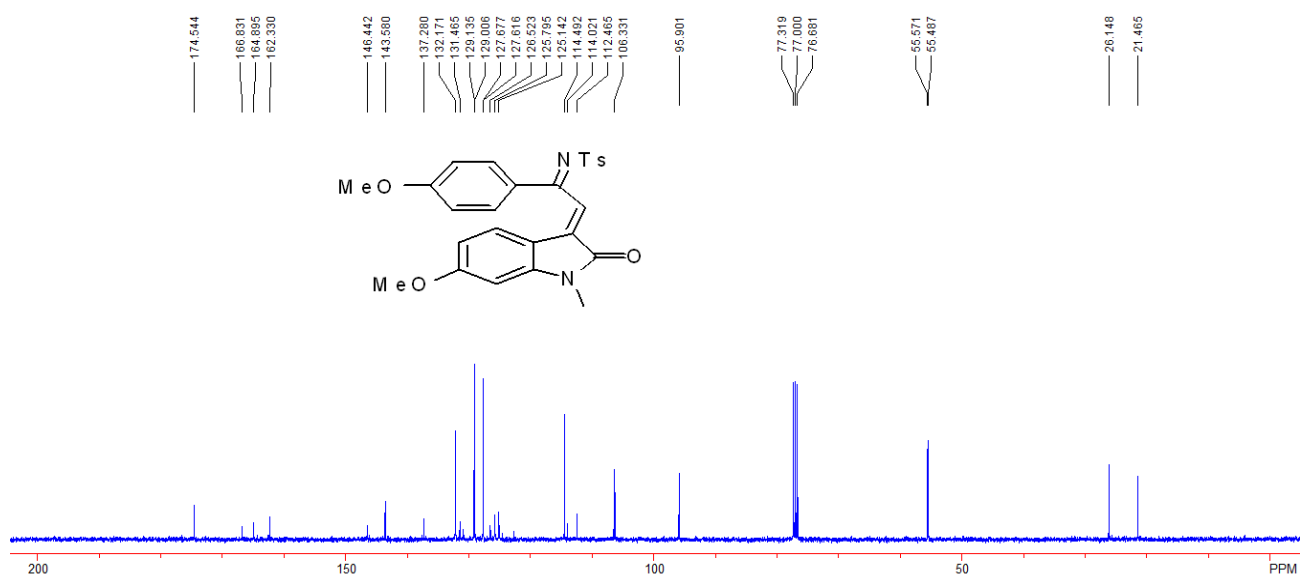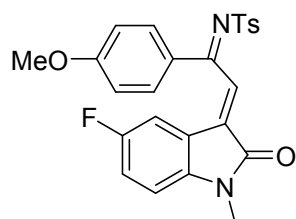

**Compound 1j:** A yellow solid, 389 mg, 42% yield; m.p. 183-184 °C; <sup>1</sup>H NMR (CDCl<sub>3</sub>, 400 MHz, TMS): δ 2.32 (s, 3H, CH<sub>3</sub>), 3.24 (s, 3H, CH<sub>3</sub>), 3.84 (s, 3H, CH<sub>3</sub>), 6.38 (d, *J* = 6.8 Hz, 1H, Ar), 6.66 (dd, *J*<sub>1</sub> = 8.8 Hz, *J*<sub>2</sub> = 4.0 Hz, 1H, Ar), 6.89 (d, *J* = 8.4 Hz, 3H, Ar), 7.17 (d, *J* = 7.6 Hz, 2H, Ar), 7.77 (s, 1H, =CH), 7.80 (d, *J* = 8.0 Hz, 2H, Ar), 7.97 (d, *J* = 8.8 Hz, 2H, Ar); <sup>13</sup>C NMR (CDCl<sub>3</sub>, 100 MHz, TMS): δ 21.4, 26.2, 55.6, 108.6 (d, *J* = 8.3 Hz), 111.7 (d, *J* = 25.8 Hz), 114.1, 114.6, 117.0 (d, *J* =

23.6 Hz), 120.3 (d,  $J = 8.7$  Hz), 125.7, 127.6, 129.2, 130.3, 130.4 (d,  $J = 2.7$  Hz), 132.1, 136.8, 140.6, 143.8, 158.4 (d,  $J = 239.1$  Hz), 165.2, 165.7, 173.5;  $^{19}\text{F}$  NMR ( $\text{CDCl}_3$ , 376 MHz,  $\text{CFCl}_3$ ):  $\delta$  -120.69 - 120.63(m); HRMS (ESI) Calcd. For  $\text{C}_{25}\text{H}_{22}\text{FN}_2\text{O}_4\text{S}^+$  ( $\text{M}+\text{H}$ ) $^+$  requires 465.1279, Found: 465.1278. IR ( $\text{CH}_2\text{Cl}_2$ ):  $\nu$  668, 737, 775, 808, 1089, 1155, 1172, 1262, 1317, 1468, 1487, 1534, 1602, 1714, 2922, 2955  $\text{cm}^{-1}$ .

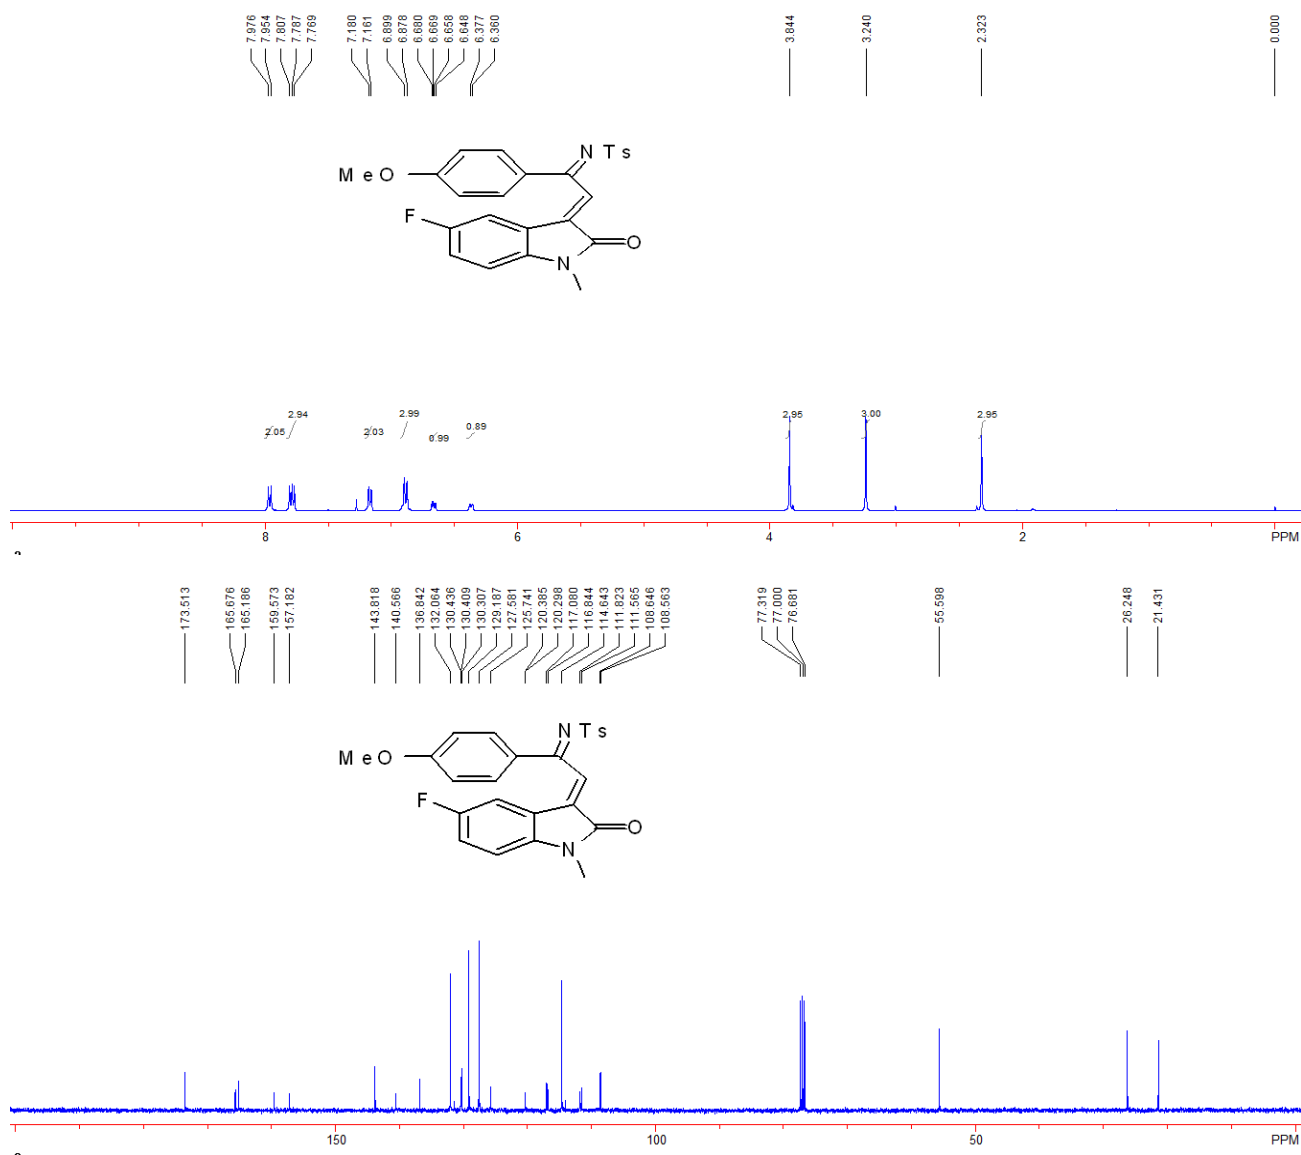



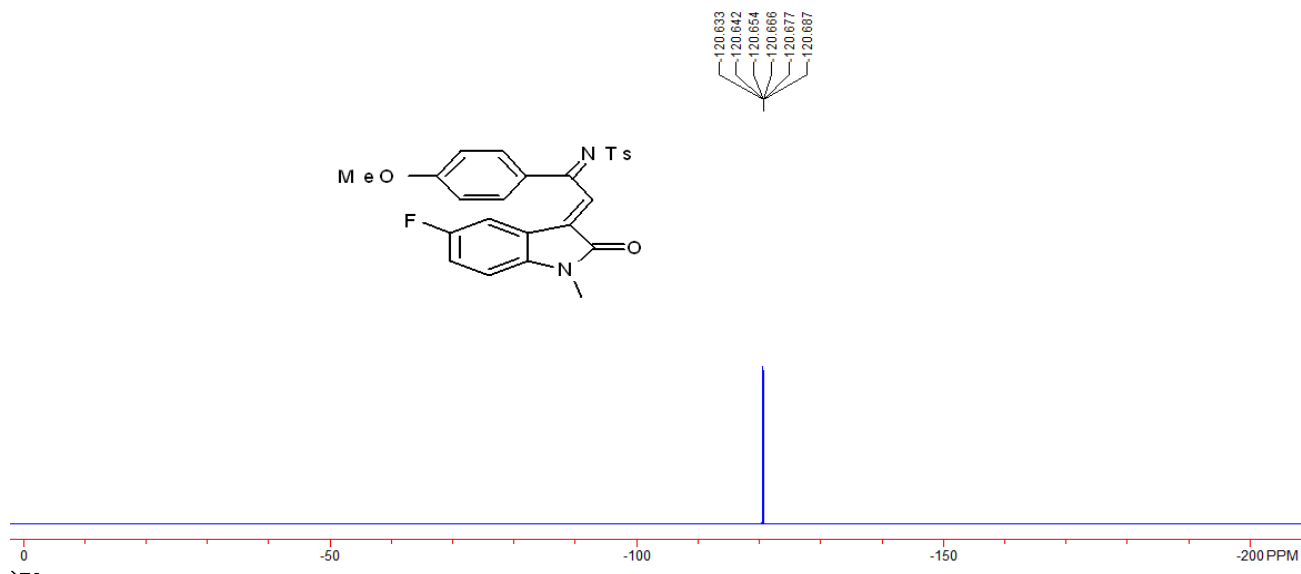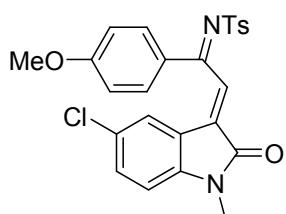

**Compound 1k:** A yellow solid, 451 mg, 47% yield; m.p. 194-195 °C;  $^1\text{H}$  NMR ( $\text{CDCl}_3$ , 400 MHz, TMS):  $\delta$  2.31 (s, 3H,  $\text{CH}_3$ ), 3.24 (s, 3H,  $\text{CH}_3$ ), 3.85 (s, 3H,  $\text{CH}_3$ ), 6.51 (s, 1H, Ar), 6.66 (d,  $J = 8.4$  Hz, 1H, Ar), 6.89 (d,  $J = 9.2$  Hz, 2H, Ar), 7.12-7.16 (m, 3H, Ar), 7.77-7.79 (m, 3H, Ar, =CH), 7.96 (d,  $J = 8.8$  Hz, 2H, Ar);  $^{13}\text{C}$  NMR ( $\text{CDCl}_3$ , 100 MHz, TMS):  $\delta$  21.4, 26.3, 55.6, 109.0, 114.7, 120.7, 124.0, 125.8, 127.2, 127.5, 127.6, 129.2, 129.8, 130.3, 130.7, 132.1, 136.7, 142.9, 143.8, 165.2, 165.5, 173.7; HRMS (ESI) Calcd. For  $\text{C}_{25}\text{H}_{22}\text{ClN}_2\text{O}_4\text{S}^+$  ( $\text{M}+\text{H}$ ) $^+$  requires 481.0983, Found: 481.0975; IR ( $\text{CH}_2\text{Cl}_2$ ):  $\nu$  669, 742, 763, 1017, 1088, 1154, 1171, 1262, 1319, 1533, 1606, 1716, 2926  $\text{cm}^{-1}$ .

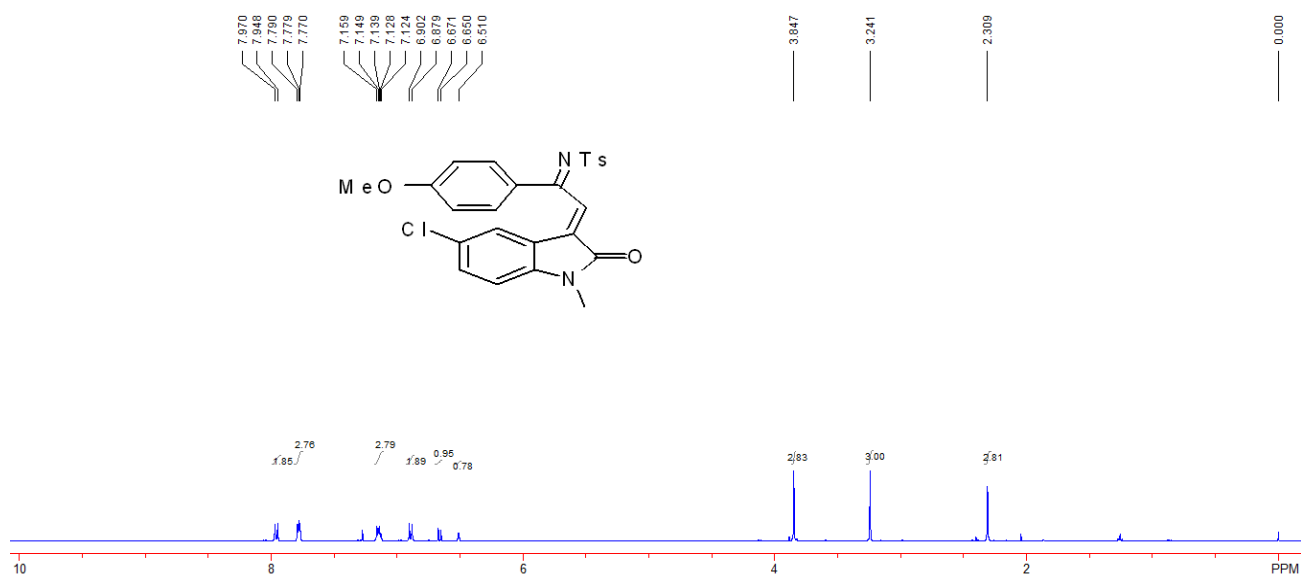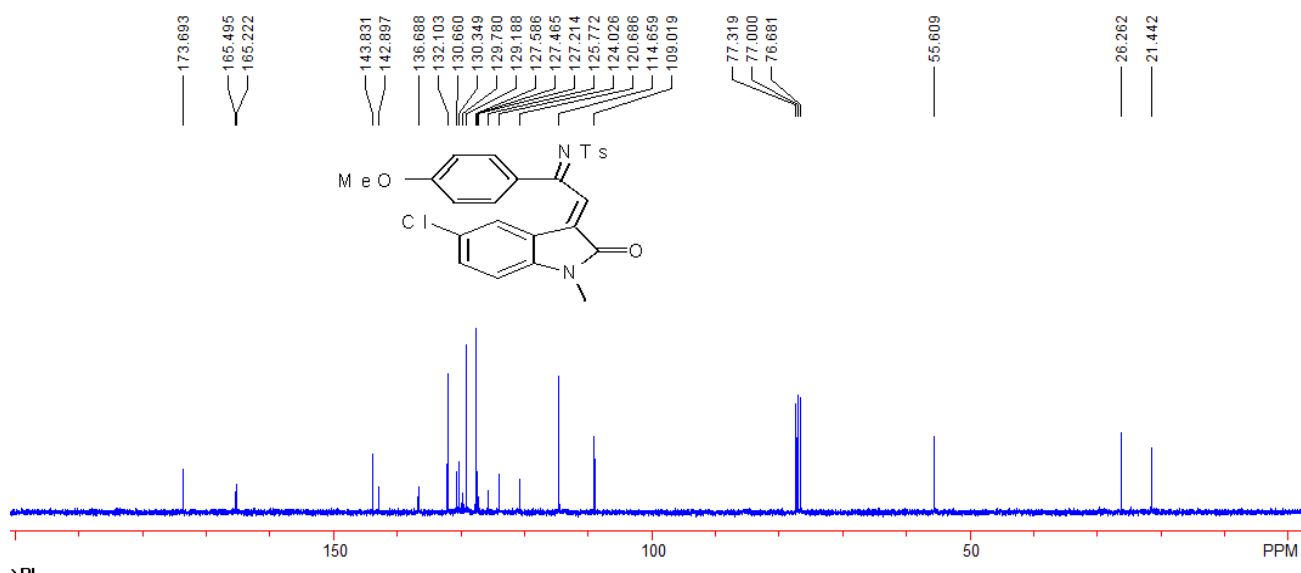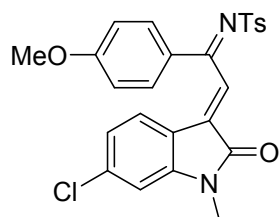

**Compound 11:** A yellow solid, 432 mg, 45% yield; m.p. 186-187 °C;  $^1\text{H}$  NMR ( $\text{CDCl}_3$ , 400 MHz, TMS):  $\delta$  2.33 (s, 3H,  $\text{CH}_3$ ), 3.24 (s, 3H,  $\text{CH}_3$ ), 3.83 (s, 3H,  $\text{CH}_3$ ), 6.56 (d,  $J = 8.0$  Hz, 1H, Ar), 6.64 (dd,  $J_1 = 8.0$  Hz,  $J_2 = 1.6$  Hz, 1H, Ar), 6.74 (d,  $J = 2.0$  Hz, 1H, Ar), 6.87 (d,  $J = 8.8$  Hz, 2H, Ar), 7.16 (d,  $J = 8.0$  Hz, 2H, Ar), 7.72 (s, 1H, =CH), 7.78 (d,  $J = 8.0$  Hz, 2H, Ar), 7.95 (d,  $J = 8.8$  Hz, 2H, Ar);  $^{13}\text{C}$  NMR ( $\text{CDCl}_3$ , 100 MHz, TMS):  $\delta$  21.4, 26.2, 55.6, 108.8, 114.5, 117.8, 122.1, 124.9, 125.8,

127.5, 129.1, 129.2, 129.9, 132.0, 136.6, 136.8, 143.8, 145.5, 165.1, 165.8, 173.7; HRMS (ESI) Calcd. For  $C_{25}H_{22}ClN_2O_4S^+$  (M+H)<sup>+</sup> requires 481.0983, Found: 481.0982; IR (CH<sub>2</sub>Cl<sub>2</sub>):  $\nu$  667, 742, 763, 1017, 1087, 1153, 1171, 1260, 1292, 1318, 1373, 1537, 1606, 1716, 2931 cm<sup>-1</sup>.

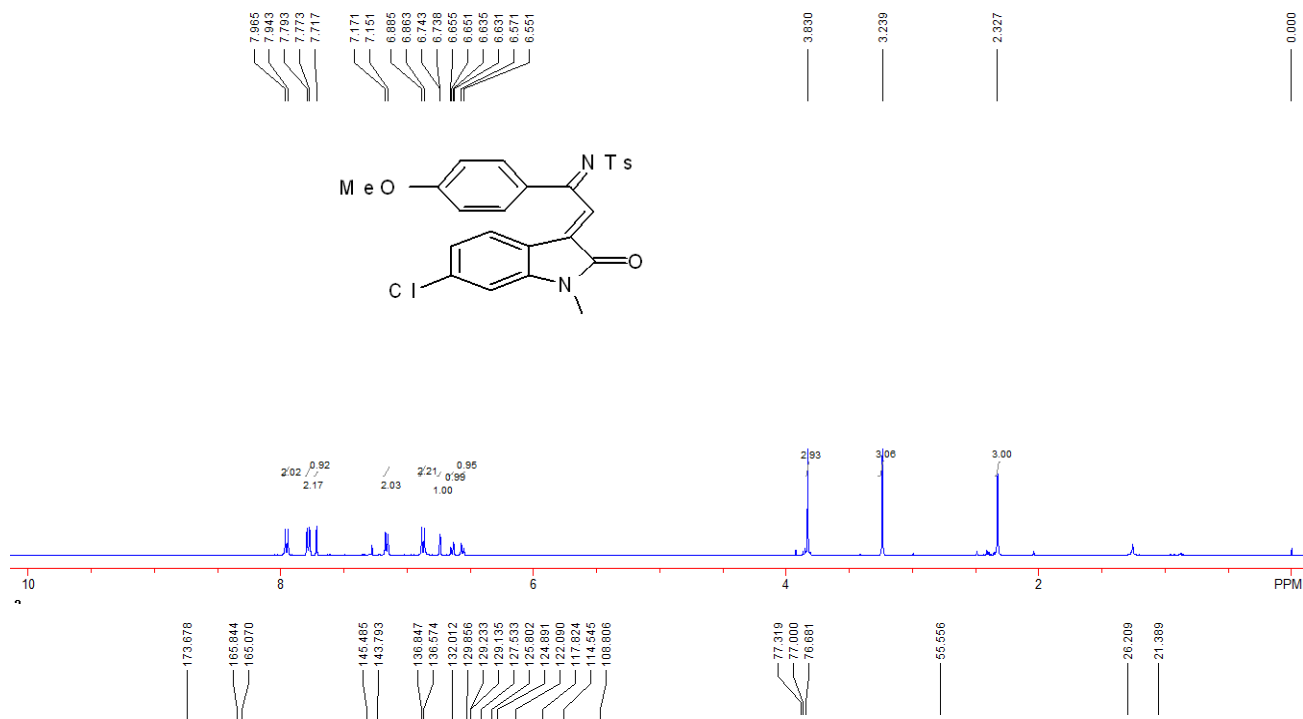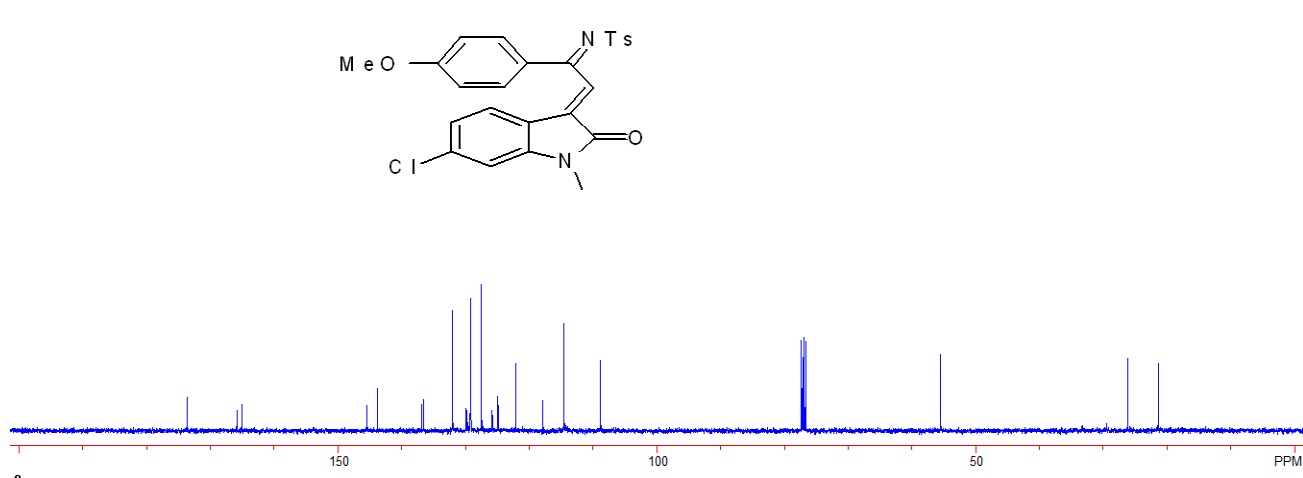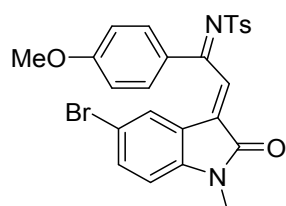

**Compound 1m:** A yellow solid, 377 mg, 36% yield; m.p. 206-207 °C; <sup>1</sup>H NMR (CDCl<sub>3</sub>, 400 MHz, TMS):  $\delta$  2.31 (s, 3H, CH<sub>3</sub>), 3.24 (s, 3H, CH<sub>3</sub>), 3.85 (s, 3H, CH<sub>3</sub>), 6.62 (d,  $J$  = 4.0 Hz, 2H, Ar), 6.89

(d,  $J = 8.8$  Hz, 2H, Ar), 7.15 (d,  $J = 7.6$  Hz, 2H, Ar), 7.29 (s, 1H, Ar), 7.76-7.79 (m, 3H, Ar, =CH), 7.96 (d,  $J = 8.4$  Hz, 2H, Ar);  $^{13}\text{C}$  NMR ( $\text{CDCl}_3$ , 100 MHz, TMS):  $\delta$  21.5, 26.3, 55.6, 109.5, 114.68, 114.75, 122.1, 125.8, 126.8, 127.6, 129.2, 129.6, 130.7, 132.1, 133.2, 136.6, 143.3, 143.8, 165.2, 165.4, 173.8; HRMS (ESI) Calcd. For  $\text{C}_{25}\text{H}_{22}\text{BrN}_2\text{O}_4\text{S}^+$  ( $\text{M}+\text{H}$ ) $^+$  requires 525.0478, Found: 525.0473; IR ( $\text{CH}_2\text{Cl}_2$ ):  $\nu$  669, 763, 1019, 1089, 1155, 1171, 1262, 1320, 1537, 1604, 1719, 2919  $\text{cm}^{-1}$ .

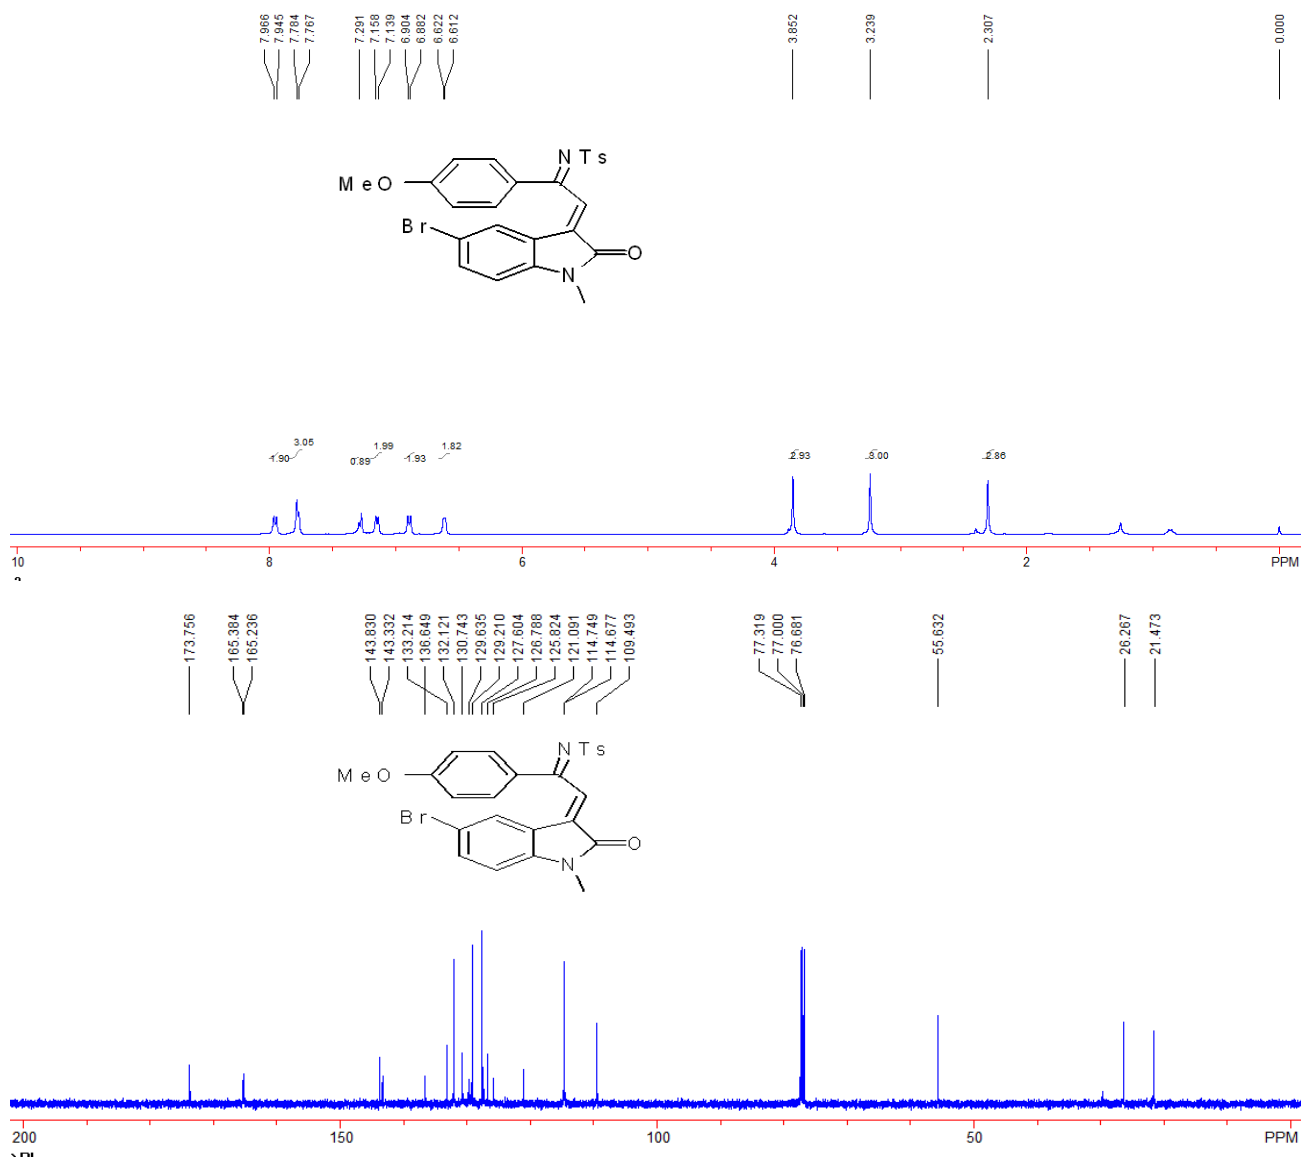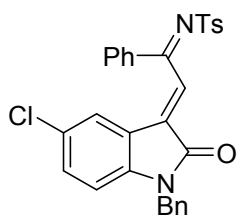

**Compound 1n:** A yellow solid, 368 mg, 35% yield; m.p. 177-178 °C; <sup>1</sup>H NMR (CDCl<sub>3</sub>, 400 MHz, TMS): δ 2.24 (s, 3H, CH<sub>3</sub>), 4.94 (s, 2H, CH<sub>2</sub>), 6.45 (s, 1H, Ar), 6.57 (d, *J* = 8.4 Hz, 1H, Ar), 7.01 (d, *J* = 8.4 Hz, 1H, Ar), 7.06 (d, *J* = 7.6 Hz, 2H, Ar), 7.31-7.47 (m, 7H, Ar), 7.61 (t, *J* = 7.2 Hz, 1H, Ar), 7.79 (d, *J* = 8.0 Hz, 2H, Ar), 7.90 (s, 1H, =CH), 8.00 (d, *J* = 7.6 Hz, 2H, Ar); <sup>13</sup>C NMR (CDCl<sub>3</sub>, 100 MHz, TMS): δ 21.4, 44.0, 110.0, 120.8, 124.2, 127.6, 127.7, 128.0, 128.9, 129.28, 129.33, 129.7, 129.9, 130.4, 130.6, 133.5, 134.9, 135.2, 136.2, 142.1, 144.1, 165.5, 175.0; HRMS (ESI) Calcd. For C<sub>30</sub>H<sub>27</sub>ClN<sub>3</sub>O<sub>3</sub>S<sup>+</sup> (M+NH<sub>4</sub>)<sup>+</sup> requires 544.1456, Found: 544.1453; IR (CH<sub>2</sub>Cl<sub>2</sub>): ν 685, 758, 815, 1089, 1158, 1327, 1475, 1548, 1716, 2920, 2954 cm<sup>-1</sup>.

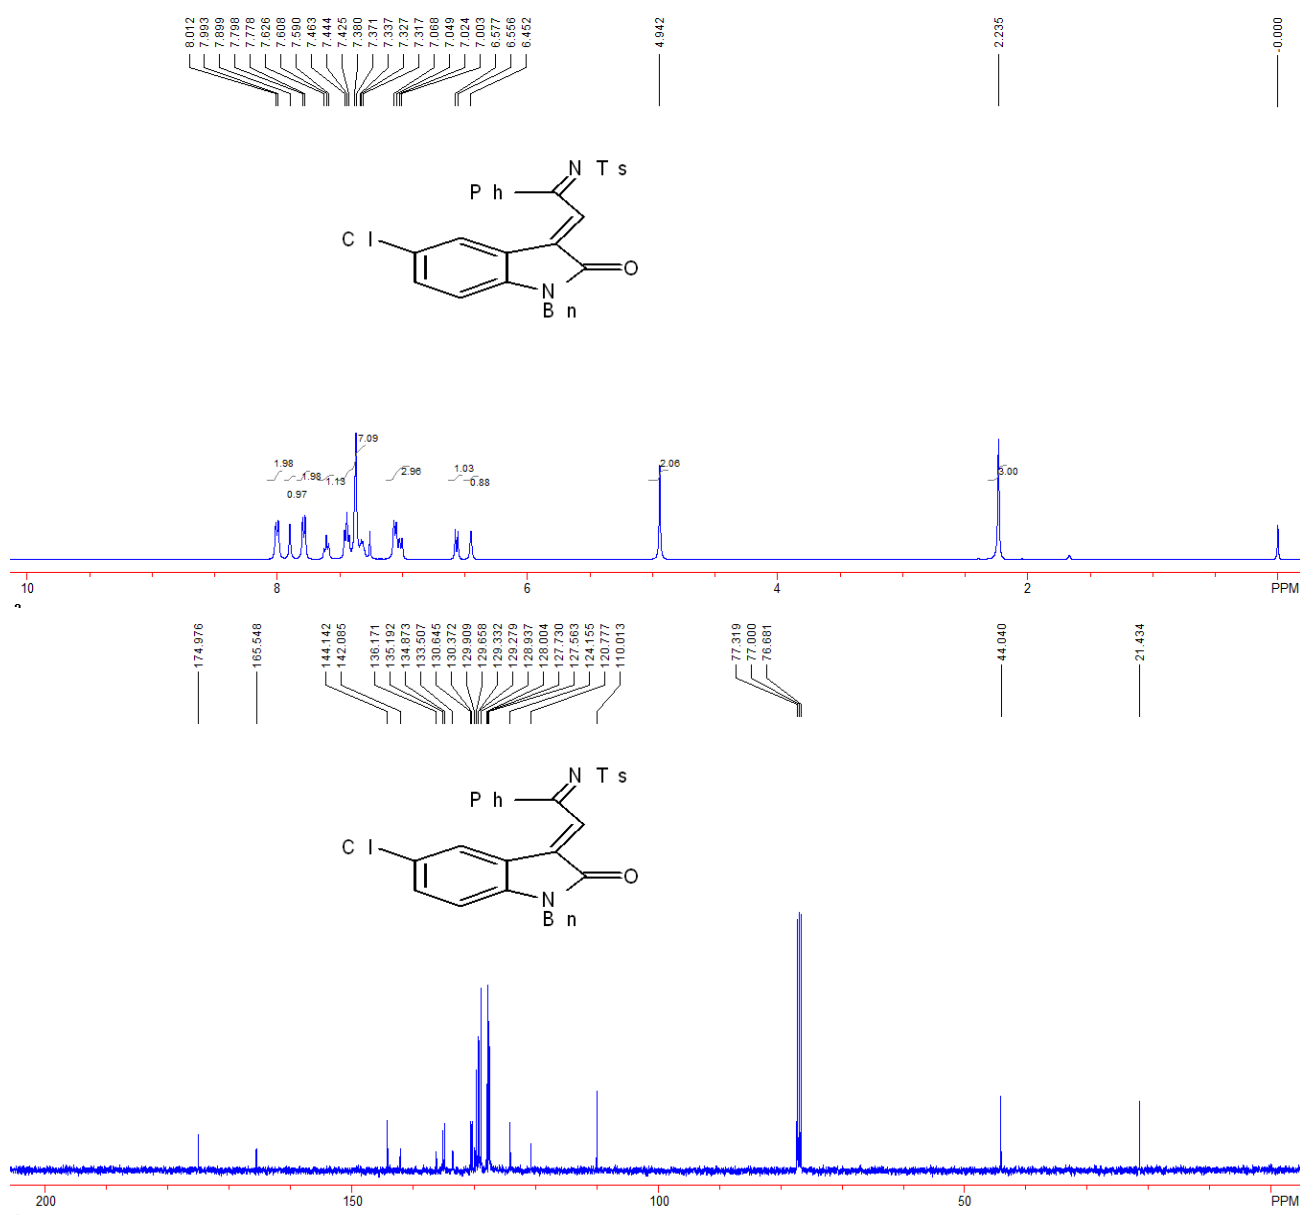

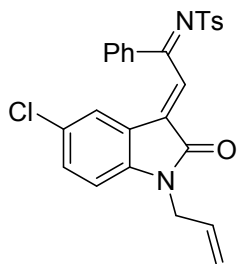

**Compound 10:** A yellow solid, 426 mg, 37% yield; m.p. 168-169 °C;  $^1\text{H}$  NMR ( $\text{CDCl}_3$ , 400 MHz, TMS):  $\delta$  2.33 (s, 3H,  $\text{CH}_3$ ), 4.38 (d,  $J = 5.2$  Hz, 2H,  $\text{CH}_2$ ), 5.27 (s, 1H,  $=\text{CH}_2$ ), 5.30 (d,  $J = 5.2$  Hz, 1H,  $=\text{CH}_2$ ), 5.81-5.91 (m, 1H,  $=\text{CH}$ ), 6.51 (s, 1H, Ar), 6.68 (d,  $J = 8.4$  Hz, 1H, Ar), 7.10 (dd,  $J_1 = 8.4$  Hz,  $J_2 = 1.6$  Hz, 1H, Ar), 7.19 (d,  $J = 8.4$  Hz, 2H, Ar), 7.43 (t,  $J = 7.6$  Hz, 2H, Ar), 7.60 (t,  $J = 7.6$  Hz, 1H, Ar), 7.82 (d,  $J = 8.0$  Hz, 2H, Ar), 7.84 (s, 1H,  $=\text{CH}$ ), 7.98 (d,  $J = 8.0$  Hz, 2H, Ar);  $^{13}\text{C}$  NMR ( $\text{CDCl}_3$ , 100 MHz, TMS):  $\delta$  21.5, 42.5, 110.0, 118.2, 120.6, 124.1, 126.3, 127.5, 127.7, 129.2, 129.3, 129.5, 129.6, 130.0, 130.3, 130.4, 130.9, 133.4, 134.8, 136.2, 142.2, 144.2, 165.1, 174.6; HRMS (ESI) Calcd. For  $\text{C}_{26}\text{H}_{22}\text{ClN}_2\text{O}_3\text{S}^+$  ( $\text{M}+\text{H}$ ) $^+$  requires 477.1034, Found: 477.1031; IR ( $\text{CH}_2\text{Cl}_2$ ):  $\nu$  684, 749, 765, 812, 1089, 1157, 1325, 1475, 1551, 1605, 1716, 2921, 2954  $\text{cm}^{-1}$ .

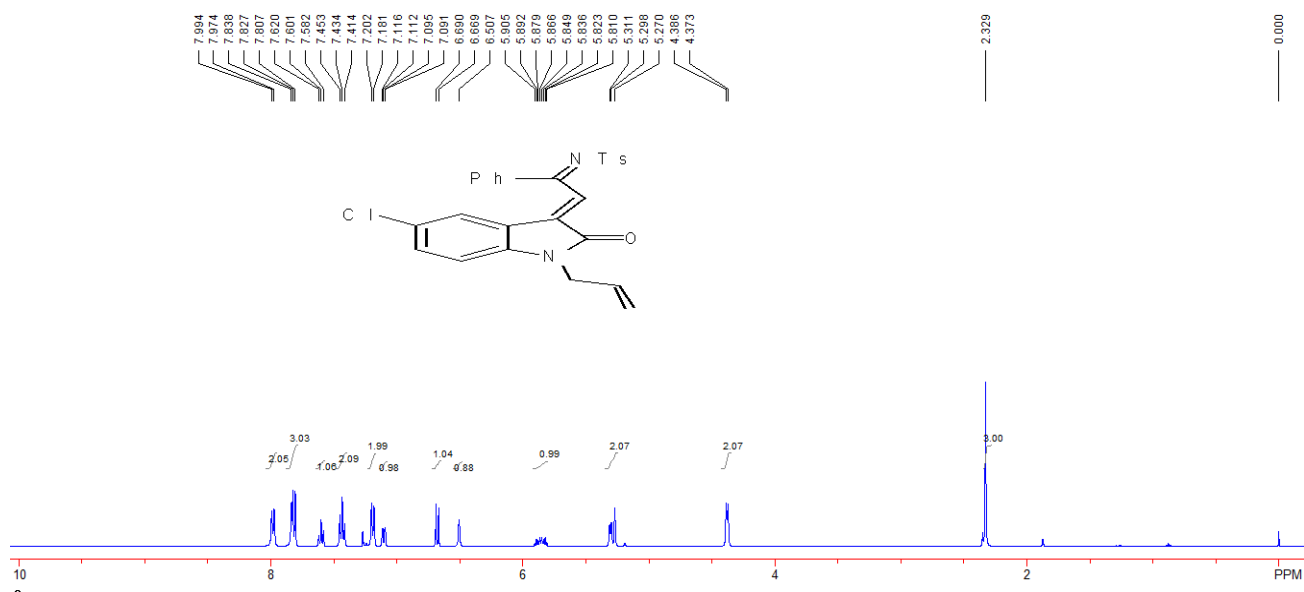

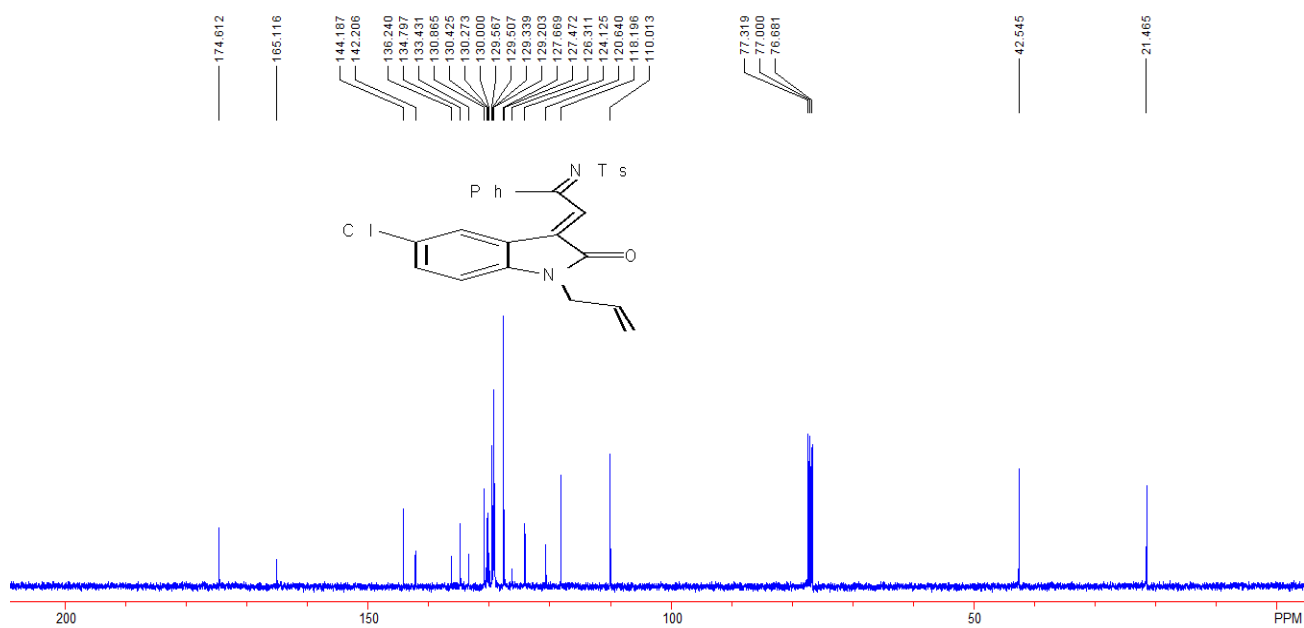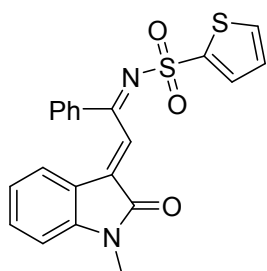

**Compound 1p:** A yellow solid, 350 mg, 43% yield (E:Z = 1.66:1); m.p. 161-162 °C; <sup>1</sup>H NMR (CDCl<sub>3</sub>, 400 MHz, TMS): δ 3.07 (s, 1.13H, CH<sub>3</sub>), 3.27 (s, 1.87H, CH<sub>3</sub>), 6.70-6.82 (m, 2H, Ar), 7.02 (t, *J* = 4.4 Hz, 1H, Ar), 7.11 (t, *J* = 7.6 Hz, 0.38H, Ar), 7.21 (t, *J* = 7.6 Hz, 0.65H, Ar), 7.35-7.74 (m, 7H, Ar, =CH), 7.99 (d, *J* = 8.0 Hz, 1H, Ar), 8.03 (d, *J* = 7.6 Hz, 1H, Ar); <sup>13</sup>C NMR (CDCl<sub>3</sub>, 100 MHz, TMS): δ 25.9, 26.2, 108.4, 108.5, 119.4, 120.6, 121.6, 122.4, 122.5, 124.5, 126.7, 127.0, 127.2, 127.6, 128.7, 129.19, 129.23, 129.8, 131.1, 131.3, 131.9, 132.8, 133.0, 133.3, 133.5, 133.6, 133.9, 134.7, 135.4, 140.6, 141.1, 144.8, 144.9, 164.6, 166.0, 174.9, 177.0; HRMS (ESI) Calcd. For C<sub>21</sub>H<sub>17</sub>N<sub>2</sub>O<sub>3</sub>S<sub>2</sub><sup>+</sup> (M+H)<sup>+</sup> requires 409.0675, Found: 409.0676; IR (CH<sub>2</sub>Cl<sub>2</sub>): ν 683, 747, 790, 812, 856, 1019, 1095, 1152, 1260, 1332, 1376, 1489, 1556, 1611, 1712, 2927, 3053 cm<sup>-1</sup>.

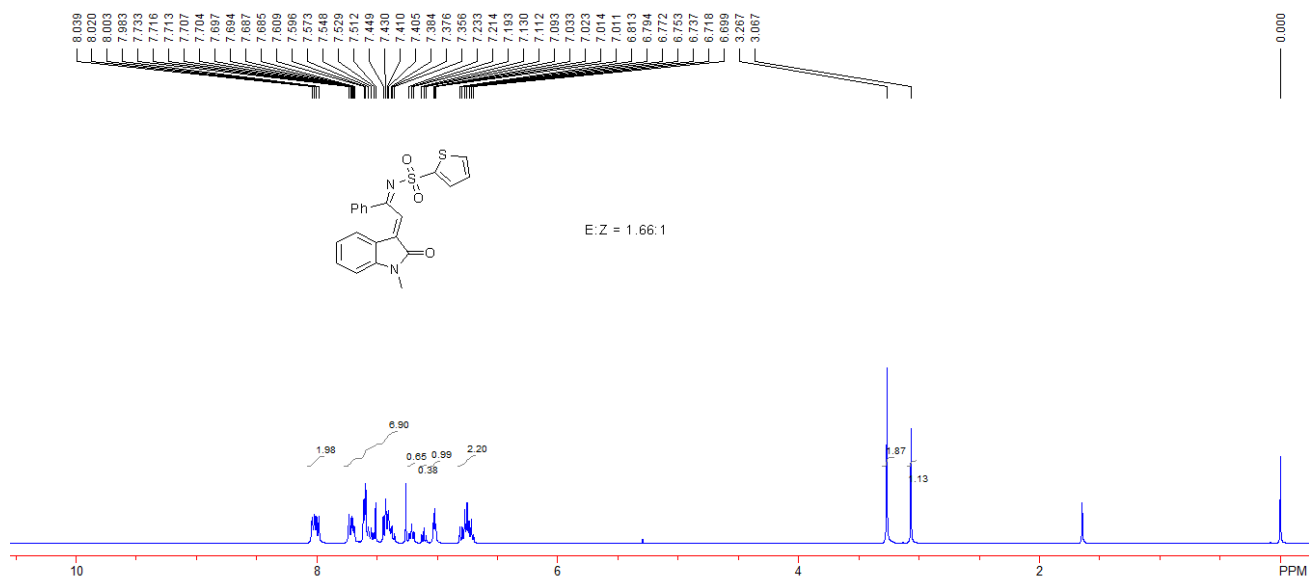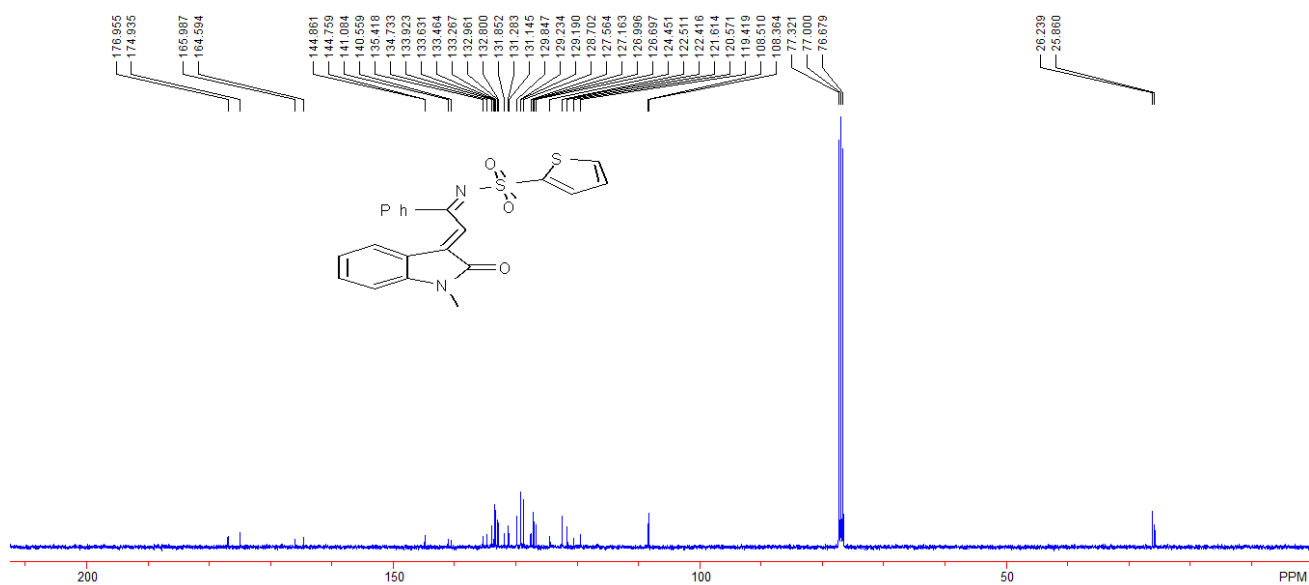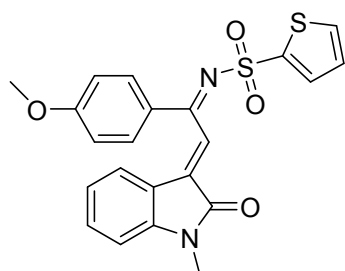

**Compound 1q:** A yellow solid, 341 mg, 39% yield; m.p. 196-197 °C; <sup>1</sup>H NMR (CDCl<sub>3</sub>, 400 MHz, TMS): δ 3.27 (s, 3H, CH<sub>3</sub>), 3.85 (s, 3H, CH<sub>3</sub>), 6.70-6.80 (m, 3H, Ar), 6.90 (d, *J* = 9.2 Hz, 2H, Ar), 6.98 (dd, *J*<sub>1</sub> = 4.8 Hz, *J*<sub>2</sub> = 4.0 Hz, 1H, Ar), 7.21 (dt, *J*<sub>1</sub> = 8.0 Hz, *J*<sub>2</sub> = 1.2 Hz, 1H, Ar), 7.55 (dd, *J*<sub>1</sub> =



4.8 Hz,  $J_2 = 1.2$  Hz, 1H, Ar), 7.67 (dd,  $J_1 = 3.6$  Hz,  $J_2 = 1.2$  Hz, 1H, Ar), 7.71 (s, 1H, =CH), 8.02 (d,  $J = 8.8$  Hz, 2H, Ar);  $^{13}\text{C}$  NMR ( $\text{CDCl}_3$ , 100 MHz, TMS):  $\delta$  26.3, 55.7, 108.3, 114.7, 119.5, 122.4, 124.5, 126.0, 127.0, 128.1, 131.0, 131.5, 132.4, 132.9, 133.1, 141.1, 144.8, 165.3, 166.1, 174.1; HRMS (ESI) Calcd. For  $\text{C}_{22}\text{H}_{19}\text{N}_2\text{O}_4\text{S}_2^+$  ( $\text{M}+\text{H}$ ) $^+$  requires 439.0781, Found: 439.0780; IR ( $\text{CH}_2\text{Cl}_2$ ):  $\nu$  745, 769, 784, 1017, 1149, 1173, 1262, 1327, 1376, 1468, 1538, 1609, 1714, 2921, 2954  $\text{cm}^{-1}$ .

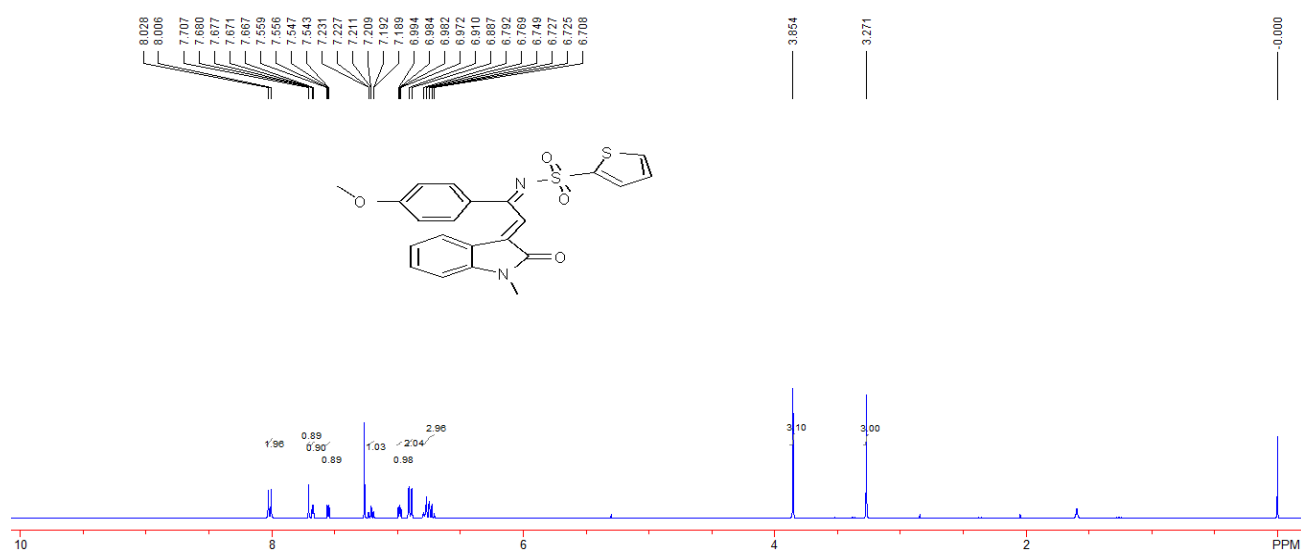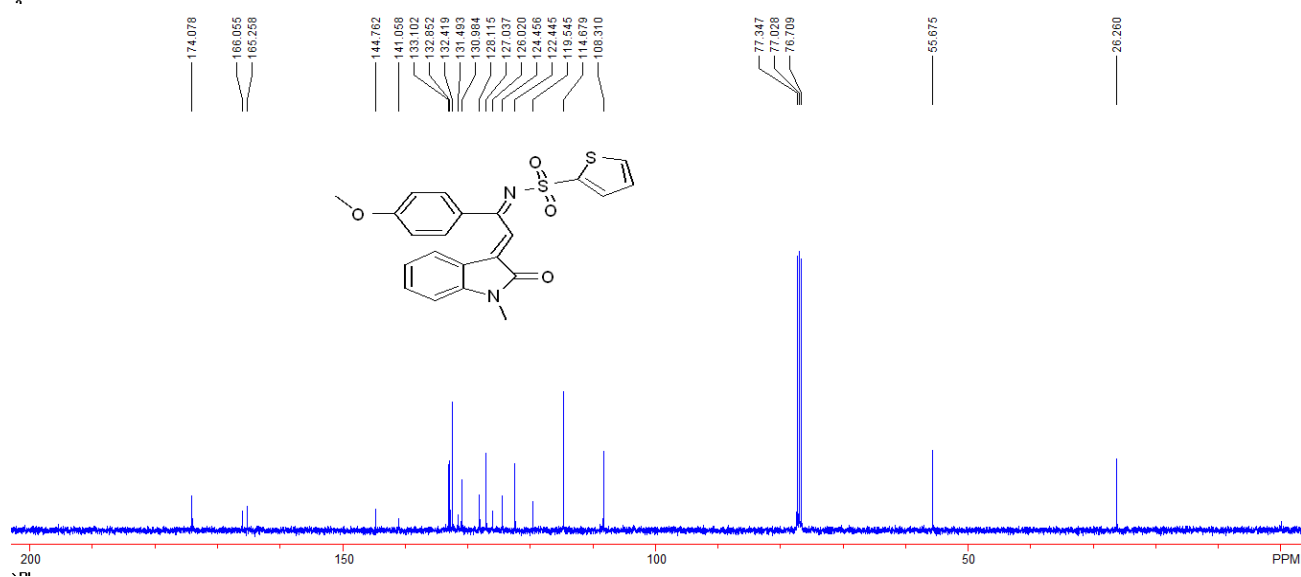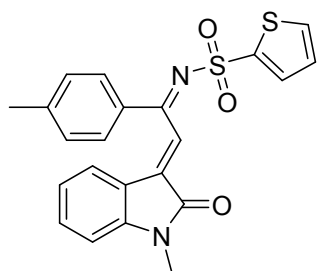

**Compound 1r:** A yellow solid, 303 mg, 36% yield; m.p. 173-174 °C; <sup>1</sup>H NMR (CDCl<sub>3</sub>, 400 MHz, TMS): δ 2.40 (s, 3H, CH<sub>3</sub>), 3.26 (s, 3H, CH<sub>3</sub>), 6.69-6.77 (m, 3H, Ar), 7.00 (dd, *J*<sub>1</sub> = 8.8 Hz, *J*<sub>2</sub> = 4.0 Hz, 1H, Ar), 7.18-7.24 (m, 3H, Ar), 7.58 (dd, *J*<sub>1</sub> = 4.8 Hz, *J*<sub>2</sub> = 1.2 Hz, 1H, Ar), 7.69 (dd, *J*<sub>1</sub> = 4.0 Hz, *J*<sub>2</sub> = 1.2 Hz, 1H, Ar), 7.71 (s, 1H, =CH), 7.93 (d, *J* = 8.4 Hz, 2H, Ar); <sup>13</sup>C NMR (CDCl<sub>3</sub>, 100 MHz, TMS): δ 21.8, 26.2, 108.3, 119.4, 122.4, 124.4, 127.1, 127.9, 129.9, 130.0, 130.9, 131.0, 131.6, 133.1, 133.3, 140.7, 144.7, 146.3, 166.0, 174.8; HRMS (ESI) Calcd. For C<sub>22</sub>H<sub>19</sub>N<sub>2</sub>O<sub>3</sub>S<sub>2</sub><sup>+</sup> (M+H)<sup>+</sup> requires 423.0832, Found: 423.0826; IR (CH<sub>2</sub>Cl<sub>2</sub>): ν 669, 744, 775, 1016, 1152, 1332, 1376, 1469, 1540, 1610, 1715, 2923, 2954 cm<sup>-1</sup>.

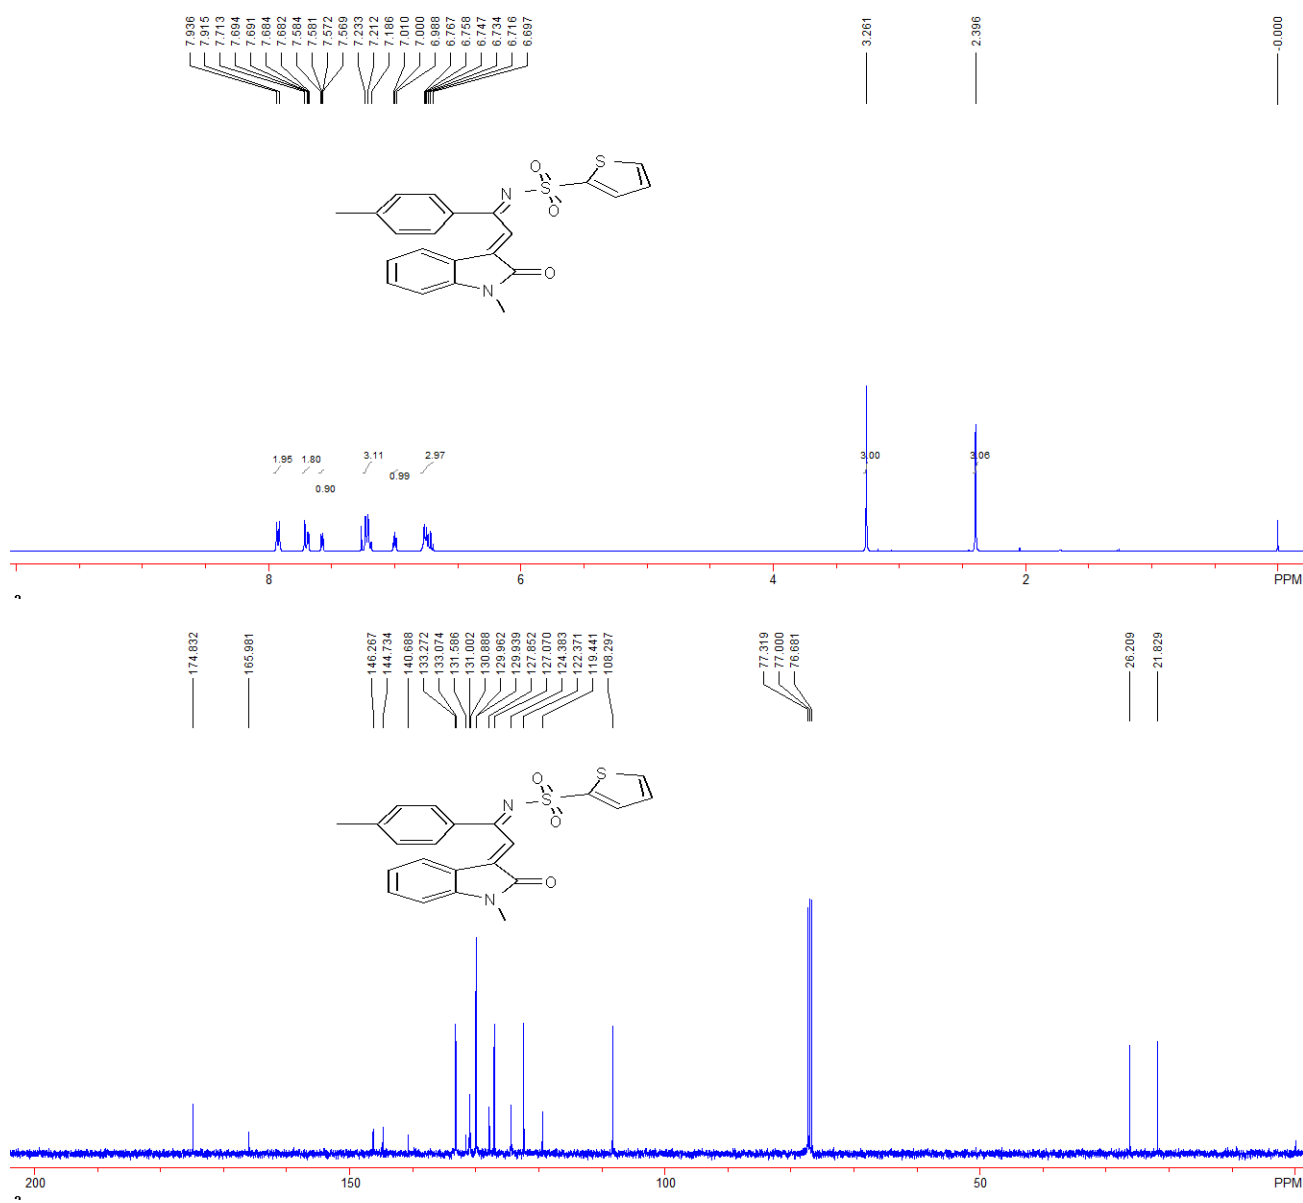

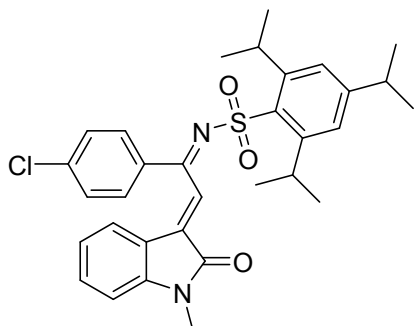

**Compound 1s:** A yellow solid, 505 mg, 45% yield; m. p. 230-231 °C;  $^1\text{H}$  NMR (400 MHz,  $\text{CDCl}_3$ , TMS):  $\delta$  1.19-1.22 (m, 18H, 6 $\text{CH}_3$ ), 2.81-2.88 (m, 1H, CH), 3.24 (s, 3H,  $\text{CH}_3$ ), 4.12-4.19 (m, 2H, 2CH), 6.66-6.72 (m, 2H, Ar), 6.74 (d, 1H,  $J = 8.0$  Hz, Ar), 7.10 (s, 2H, Ar), 7.18-7.22 (m, 1H, Ar), 7.38 (d, 2H,  $J = 8.8$  Hz, Ar), 7.48 (s, 1H, =CH), 7.95 (d, 2H,  $J = 8.8$  Hz, Ar);  $^{13}\text{C}$  NMR (100 MHz,  $\text{CDCl}_3$ , TMS):  $\delta$  23.5, 24.6, 26.1, 30.0, 34.1, 108.3, 119.2, 122.2, 123.4, 124.3, 127.2, 129.5, 130.7, 131.1, 131.4, 132.3, 132.9, 140.8, 144.6, 150.0, 153.3, 165.7, 172.8; HRMS (ESI) Calcd. For  $\text{C}_{32}\text{H}_{36}\text{ClN}_2\text{O}_3\text{S}^+$  ( $\text{M}+\text{H}$ ) $^+$  requires 563.2135, Found: 563.2119; IR ( $\text{CH}_2\text{Cl}_2$ ):  $\nu$  667, 775, 882, 1101, 1150, 1320, 1470, 1552, 1597, 1610, 1716, 2869, 2959  $\text{cm}^{-1}$ .

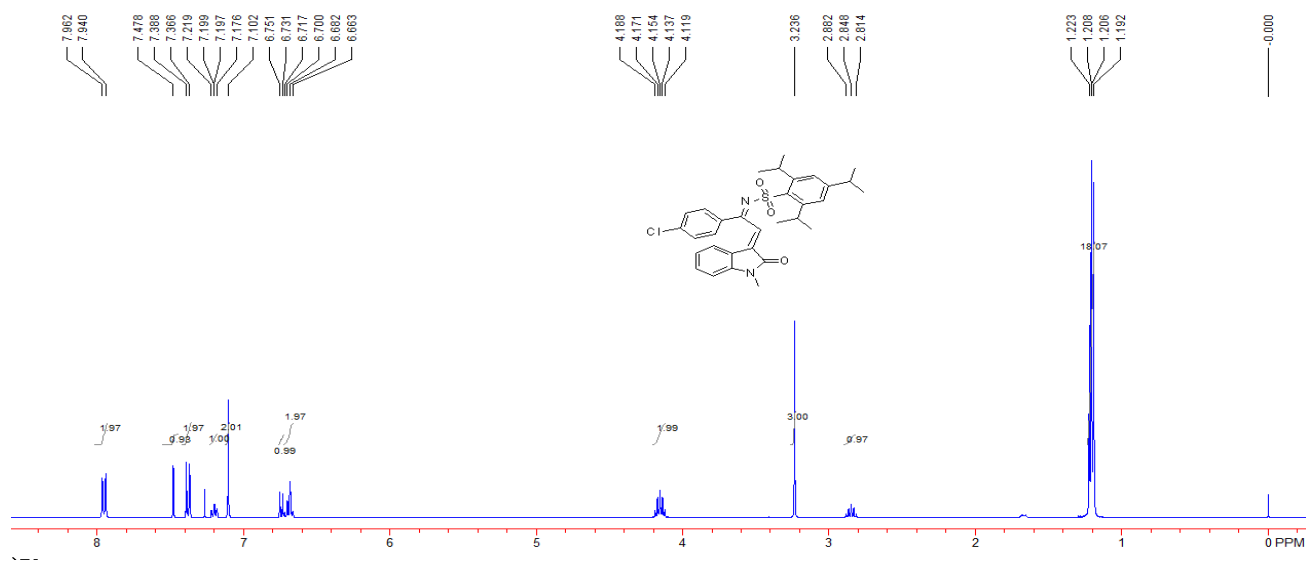

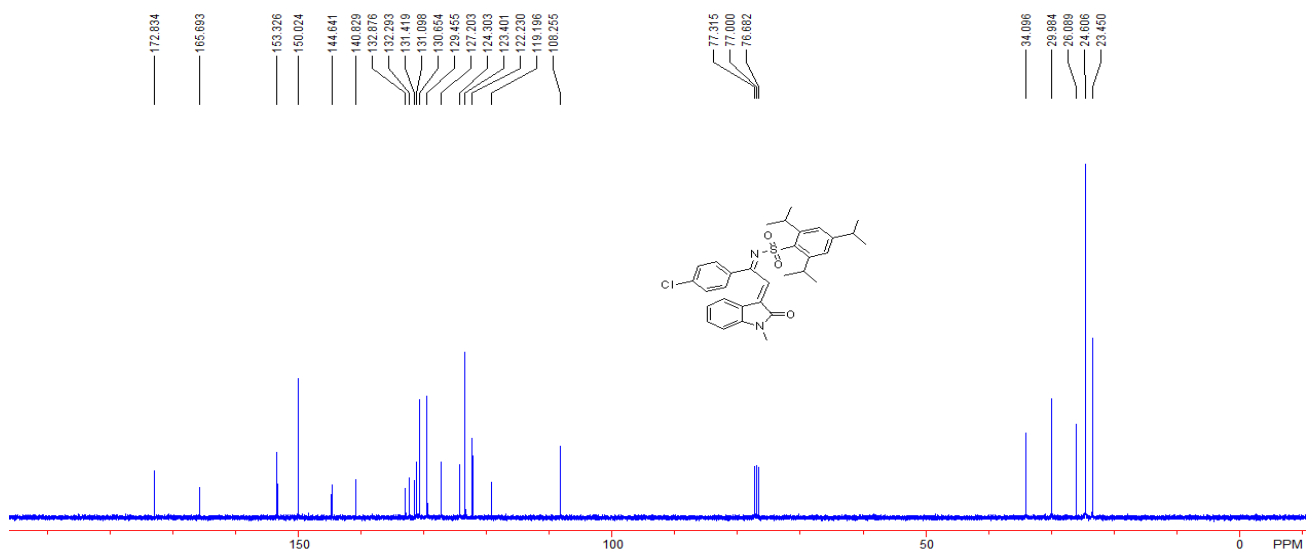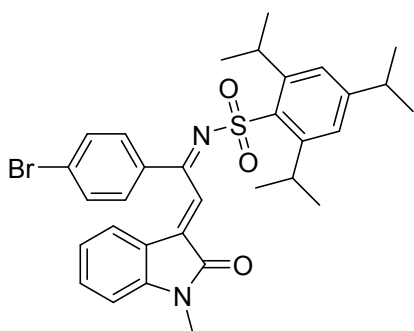

**Compound 1t:** A yellow solid, 412 mg, 34% yield; m. p. 231-232 °C; <sup>1</sup>H NMR (400 MHz, CDCl<sub>3</sub>, TMS): δ 1.19-1.22 (m, 18H, 6CH<sub>3</sub>), 2.81-2.88 (m, 1H, CH), 3.24 (s, 3H, CH<sub>3</sub>), 4.11-4.18 (m, 2H, 2CH), 6.66-6.75 (m, 3H, Ar), 7.10 (s, 2H, Ar), 7.18-7.22 (m, 1H, Ar), 7.47 (s, 1H, =CH), 7.54 (d, 2H, *J* = 8.4 Hz, Ar), 7.87 (d, 2H, *J* = 8.4 Hz, Ar); <sup>13</sup>C NMR (100 MHz, CDCl<sub>3</sub>, TMS): δ 23.5, 24.6, 26.1, 30.0, 34.1, 108.3, 119.2, 122.3, 123.4, 124.3, 127.2, 129.7, 130.7, 131.1, 131.4, 132.4, 132.7, 132.9, 144.6, 150.0, 153.3, 165.7, 173.0; HRMS (ESI) Calcd. For C<sub>32</sub>H<sub>36</sub>BrN<sub>2</sub>O<sub>3</sub>S<sup>+</sup> (M+H)<sup>+</sup> requires 607.1630, Found: 607.1609; IR (CH<sub>2</sub>Cl<sub>2</sub>): ν 669, 692, 776, 1073, 1152, 1322, 1376, 1470, 1544, 1574, 1611, 1717, 2959, 3726 cm<sup>-1</sup>.

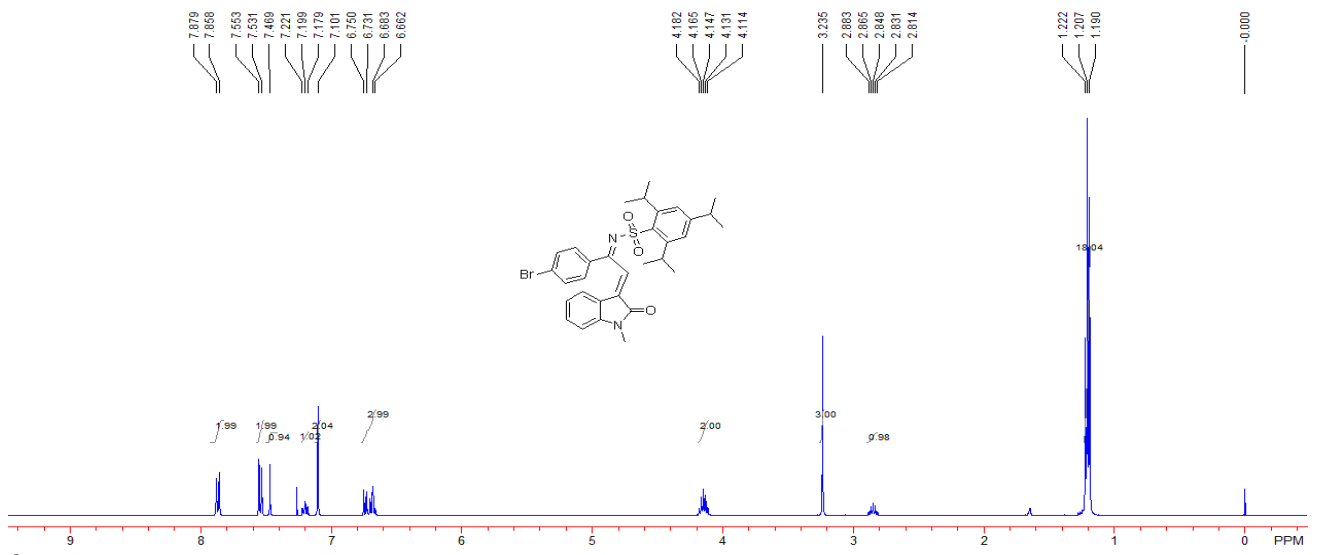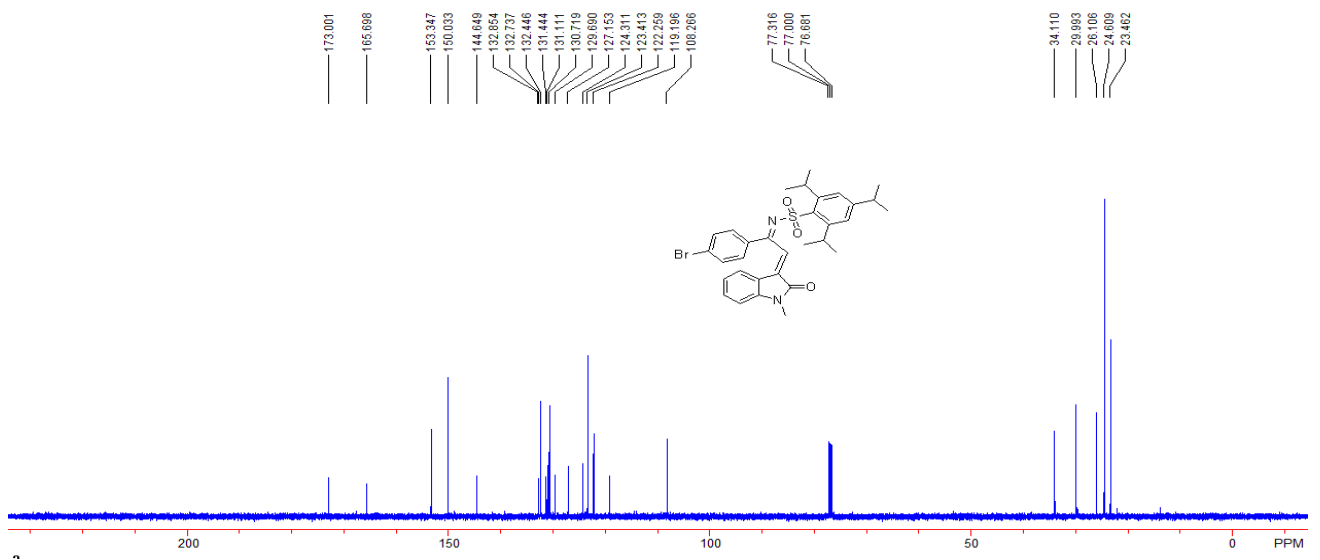

### 3. General Procedure for the [4+1] annulations of $\alpha,\beta$ -unsaturated ketones **1** with MBH Carbonates **2** and Spectroscopic Data of the Products.

*General Procedure:* Under argon atmosphere, to a solution of oxindole-derived  $\alpha,\beta$ -unsaturated imines **1** (0.2 mmol) and catalyst (0.04 mmol) in toluene (1.0 mL) was added the corresponding vinyl ketones **2** (0.3 mmol), and the reaction mixture was stirred at 0 °C until the reaction completed (monitoring by TLC). Then the solvent was removed under reduced pressure and the residue was purified by a flash column chromatography to afford the desired cyclic products **3**.

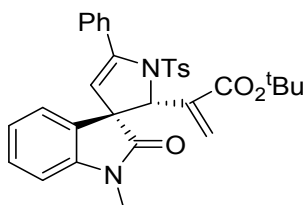

**Compound 3a:** A pale yellow solid, 98 mg, 88% yield; m.p. 104-105 °C;  $^1\text{H}$  NMR ( $\text{CDCl}_3$ , 400 MHz, TMS):  $\delta$  1.32 (s, 9H, 3 $\text{CH}_3$ ), 2.54 (s, 3H,  $\text{CH}_3$ ), 3.06 (s, 3H,  $\text{CH}_3$ ), 4.83 (s, 1H, CH), 5.26 (s, 1H, =CH), 5.53 (d,  $J = 7.2$  Hz, 1H, Ar), 6.48 (s, 1H, = $\text{CH}_2$ ), 6.63 (s, 1H, = $\text{CH}_2$ ), 6.68-6.74 (m, 2H, Ar), 7.21 (t,  $J = 8.4$  Hz, 1H, Ar), 7.34-7.39 (m, 5H, Ar), 7.53-7.56 (m, 4H, Ar);  $^{13}\text{C}$  NMR ( $\text{CDCl}_3$ , 100 MHz, TMS):  $\delta$  21.6, 26.4, 27.8, 60.4, 69.4, 80.9, 107.6, 115.1, 122.5, 123.3, 127.1, 127.7, 128.5, 128.6, 128.8, 129.3, 129.9, 131.9, 132.3, 133.1, 137.6, 142.6, 144.4, 147.5, 164.7, 174.2; HRMS (ESI) Calcd. For  $\text{C}_{32}\text{H}_{33}\text{N}_2\text{O}_5\text{S}^+$  ( $\text{M}+\text{H}$ ) $^+$  requires 557.2015, Found: 557.2013; IR ( $\text{CH}_2\text{Cl}_2$ ):  $\nu$  669, 752, 1086, 1150, 1171, 1366, 1467, 1611, 1719, 2923, 2954  $\text{cm}^{-1}$ .

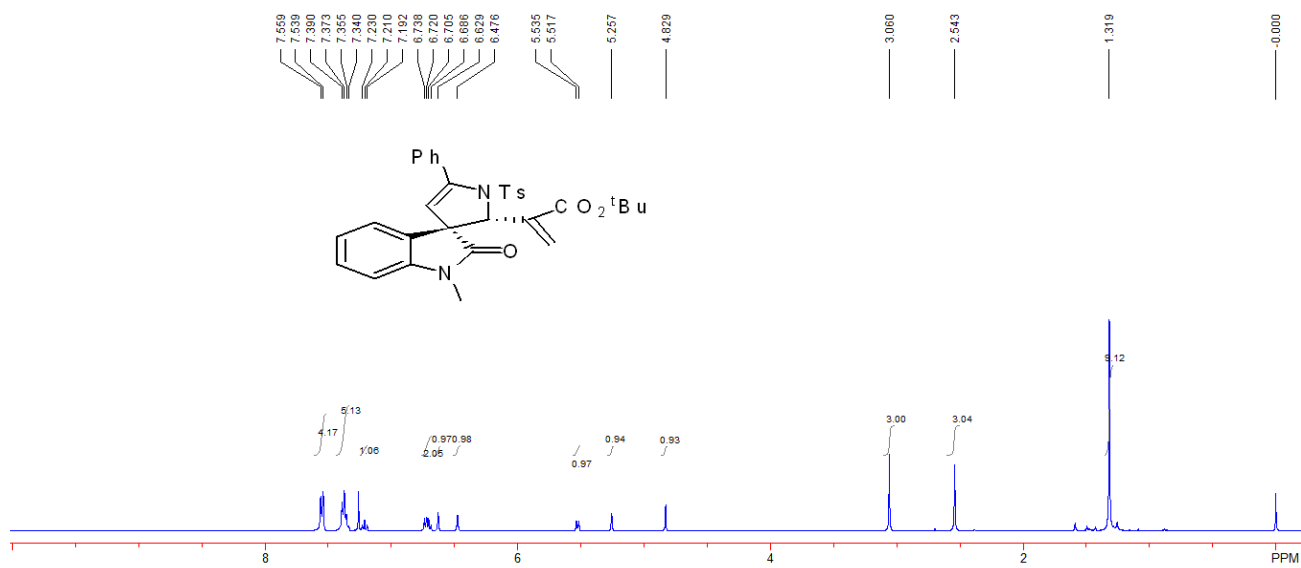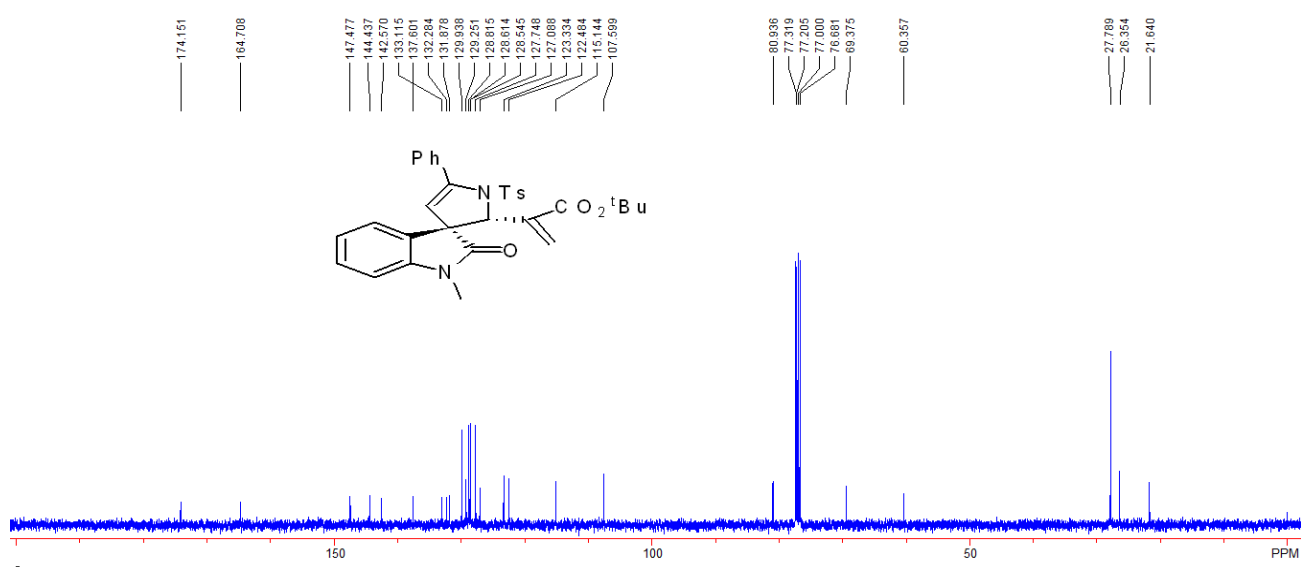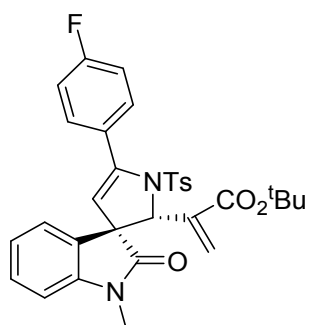

**Compound 3b:** A pale yellow solid, 82 mg, 72% yield; m.p. 125-126 °C; <sup>1</sup>H NMR (CDCl<sub>3</sub>, 400 MHz, TMS): δ 1.32 (s, 9H, 3CH<sub>3</sub>), 2.55 (s, 3H, CH<sub>3</sub>), 3.06 (s, 3H, CH<sub>3</sub>), 4.81 (s, 1H, CH), 5.24 (s, 1H, =CH), 5.50 (d, *J* = 7.2 Hz, 1H, Ar), 6.44 (s, 1H, =CH<sub>2</sub>), 6.62 (s, 1H, =CH<sub>2</sub>), 6.68-6.74 (m, 2H,

Ar), 7.05 (t,  $J = 8.4$  Hz, 2H, Ar), 7.21 (t,  $J = 8.0$  Hz, 1H, Ar), 7.39 (d,  $J = 8.0$  Hz, 2H, Ar), 7.52-7.56 (m, 4H, Ar);  $^{13}\text{C}$  NMR ( $\text{CDCl}_3$ , 100 MHz, TMS):  $\delta$  21.6, 26.4, 27.8, 60.3, 69.3, 81.0, 107.7, 114.9 (d,  $J = 21.7$  Hz), 115.1, 122.5, 123.3, 127.0, 127.9 (d,  $J = 3.4$  Hz), 128.68, 128.75, 130.0, 130.3 (d,  $J = 8.3$  Hz), 132.1, 133.0, 137.5, 142.5, 144.6, 146.4, 163.3 (d,  $J = 247.8$  Hz), 164.4, 174.1;  $^{19}\text{F}$  NMR ( $\text{CDCl}_3$ , 376 MHz,  $\text{CFCl}_3$ ):  $\delta$  -111.43; HRMS (ESI) Calcd. For  $\text{C}_{32}\text{H}_{32}\text{FN}_2\text{O}_5\text{S}^+$  ( $\text{M}+\text{H}$ ) $^+$  requires 575.2017, Found: 575.2024; IR ( $\text{CH}_2\text{Cl}_2$ ):  $\nu$  680, 716, 750, 815, 843, 1087, 1150, 1171, 1365, 1492, 1507, 1611, 1718, 2927, 2974  $\text{cm}^{-1}$ .

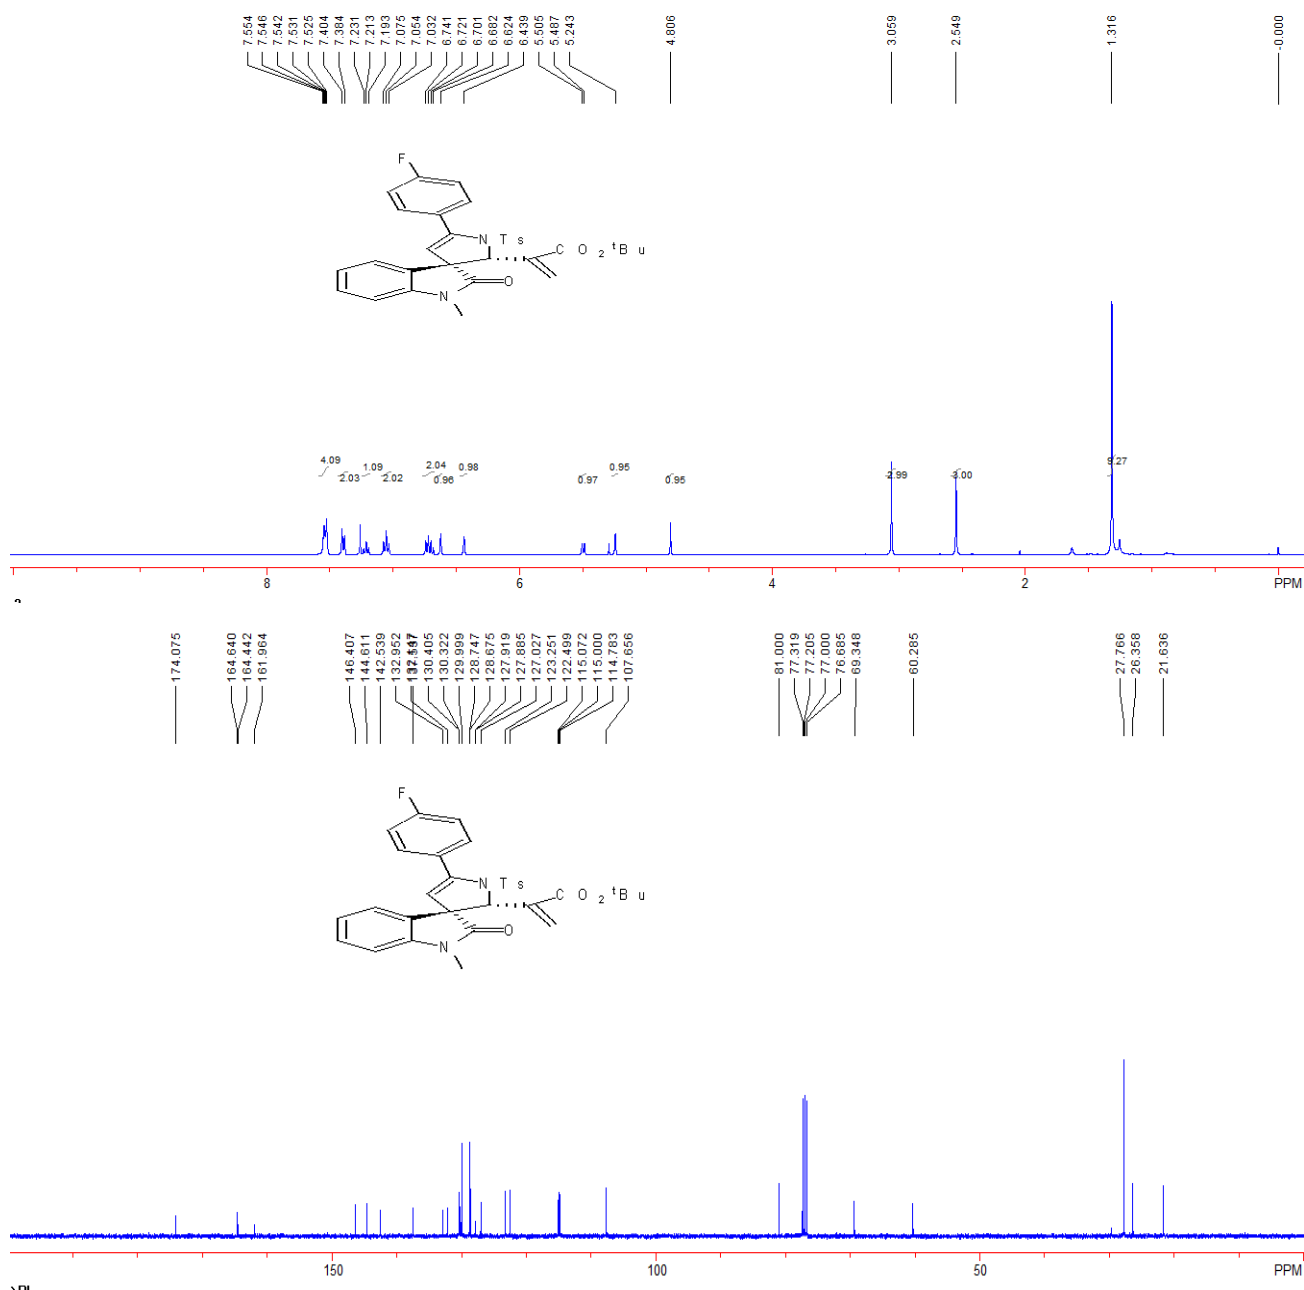



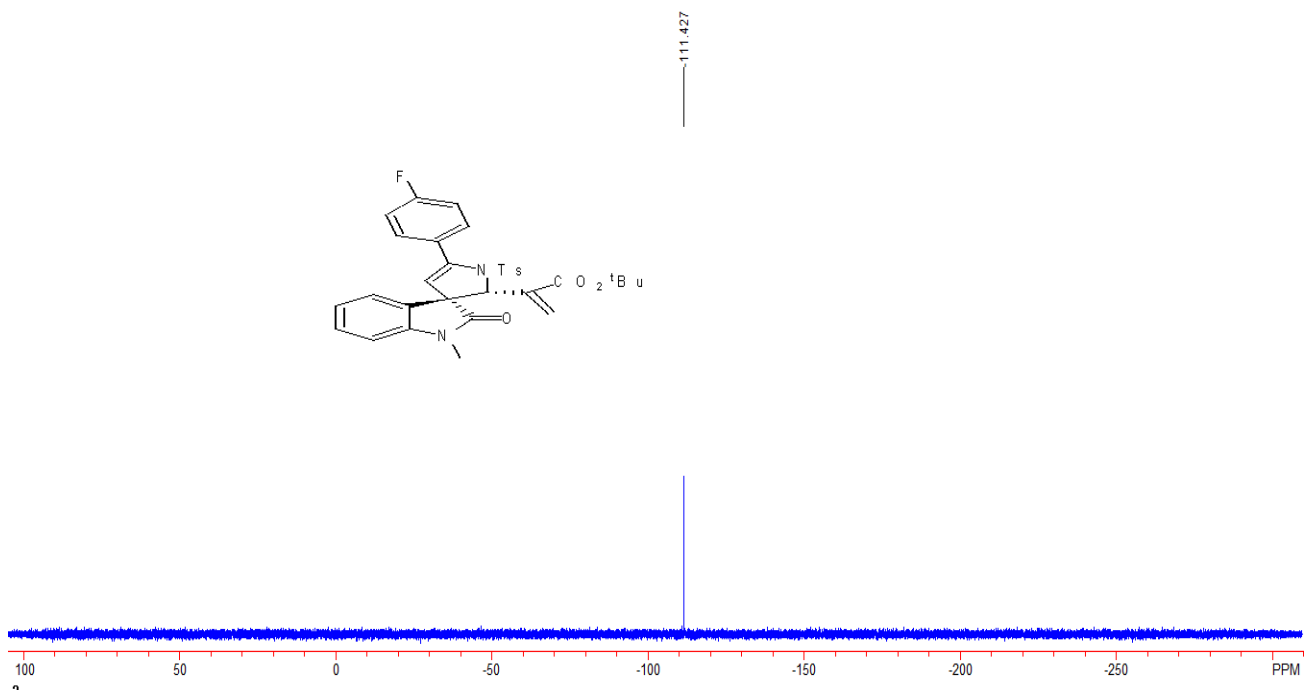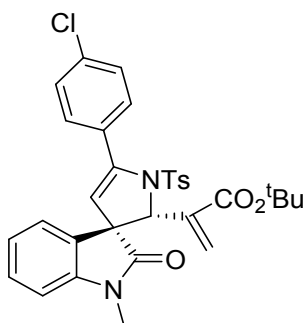

**Compound 3c:** A pale yellow solid, 99 mg, 84% yield; m.p. 113-114 °C;  $^1\text{H}$  NMR ( $\text{CDCl}_3$ , 400 MHz, TMS):  $\delta$  1.31 (s, 9H, 3 $\text{CH}_3$ ), 2.54 (s, 3H,  $\text{CH}_3$ ), 3.05 (s, 3H,  $\text{CH}_3$ ), 4.83 (s, 1H, CH), 5.24 (s, 1H, =CH), 5.47 (d,  $J = 7.6$  Hz, 1H, Ar), 6.43 (s, 1H, = $\text{CH}_2$ ), 6.62 (s, 1H, = $\text{CH}_2$ ), 6.67-6.74 (m, 2H, Ar), 7.21 (t,  $J = 8.0$  Hz, 1H, Ar), 7.33 (d,  $J = 8.4$  Hz, 2H, Ar), 7.39 (d,  $J = 8.4$  Hz, 2H, Ar), 7.49 (d,  $J = 8.4$  Hz, 2H, Ar), 7.54 (d,  $J = 8.4$  Hz, 2H, Ar);  $^{13}\text{C}$  NMR ( $\text{CDCl}_3$ , 100 MHz, TMS):  $\delta$  21.6, 26.3, 27.7, 60.3, 69.3, 81.0, 107.6, 115.6, 122.5, 123.2, 127.0, 128.0, 128.68, 128.71, 129.7, 130.0, 130.3, 132.0, 132.7, 135.1, 137.4, 142.5, 144.7, 146.3, 164.6, 173.9; HRMS (ESI) Calcd. For  $\text{C}_{32}\text{H}_{32}\text{ClN}_2\text{O}_5\text{S}^+$  ( $\text{M}+\text{H}$ ) $^+$  requires 591.1715, Found: 591.1727; IR ( $\text{CH}_2\text{Cl}_2$ ):  $\nu$  663, 677, 750, 814, 1014, 1088, 1149, 1170, 1491, 1610, 1716, 2930, 3054  $\text{cm}^{-1}$ .

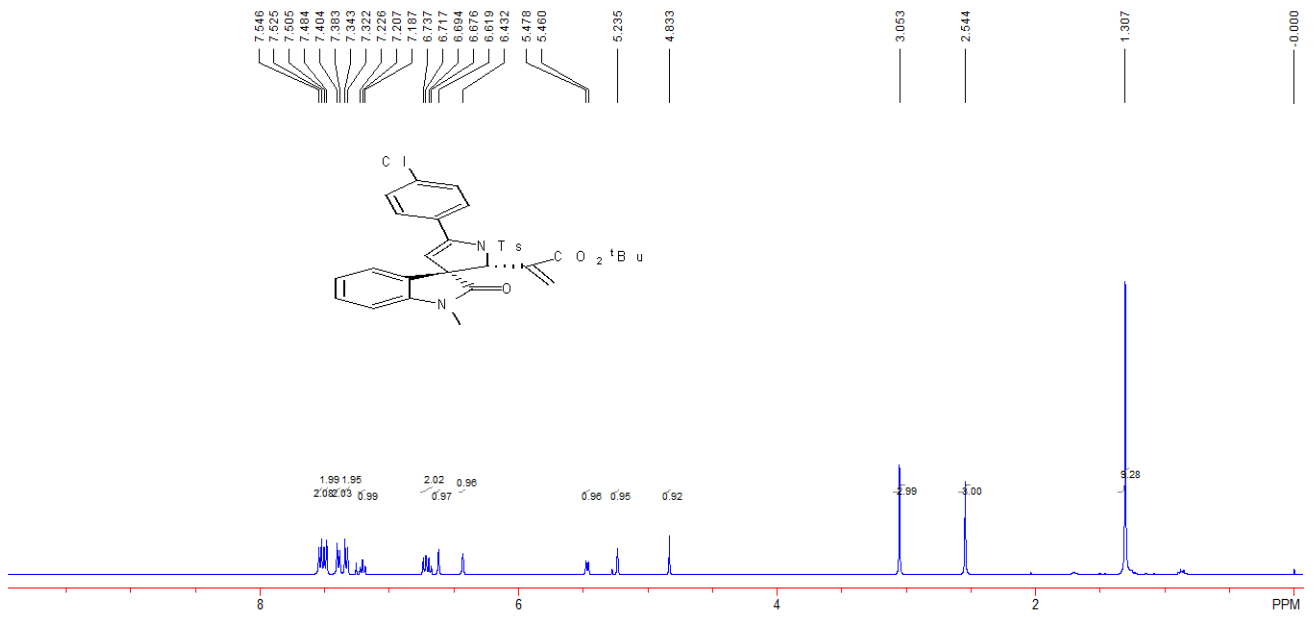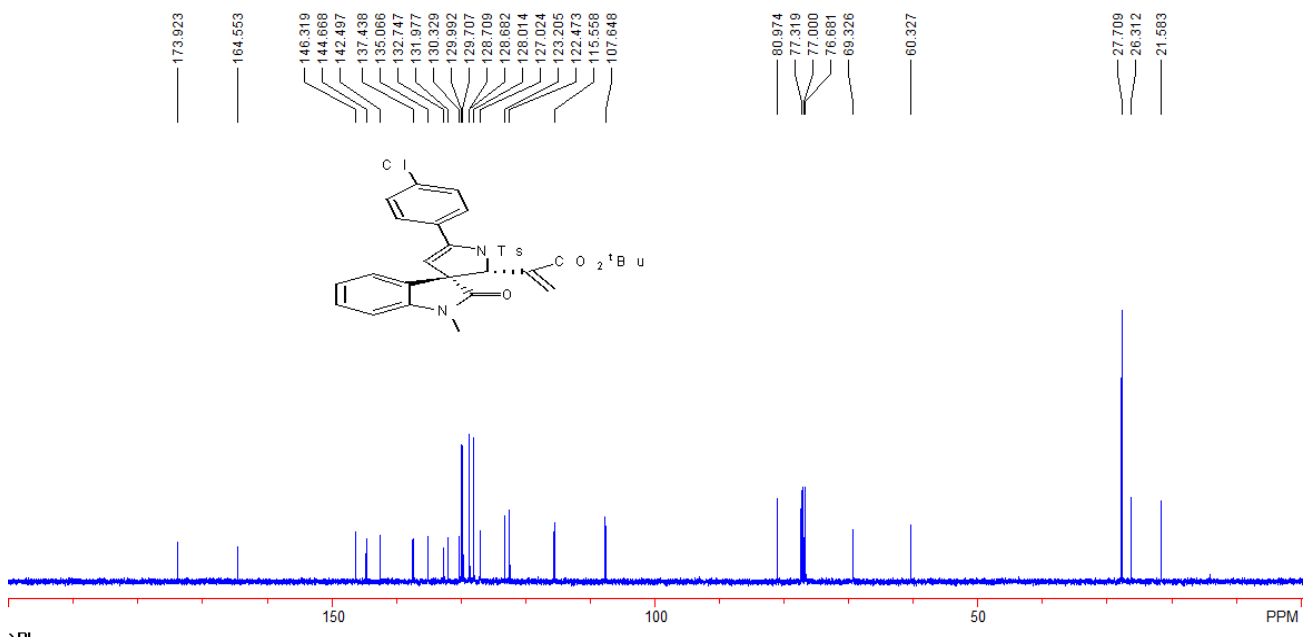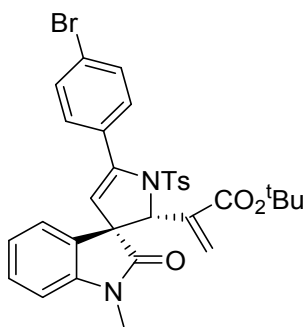

**Compound 3d:** A pale yellow solid, 99 mg, 78% yield; m.p. 129-130 °C;  $^1\text{H}$  NMR ( $\text{CDCl}_3$ , 400 MHz, TMS):  $\delta$  1.31 (s, 9H, 3 $\text{CH}_3$ ), 2.55 (s, 3H,  $\text{CH}_3$ ), 3.06 (s, 3H,  $\text{CH}_3$ ), 4.84 (s, 1H, CH), 5.23 (s, 1H, =CH), 5.46 (d,  $J = 7.2$  Hz, 1H, Ar), 6.43 (s, 1H, = $\text{CH}_2$ ), 6.62 (s, 1H, = $\text{CH}_2$ ), 6.67-6.74 (m, 2H, Ar), 7.21 (t,  $J = 8.0$  Hz, 1H, Ar), 7.40 (d,  $J = 8.0$  Hz, 2H, Ar), 7.43 (d,  $J = 8.4$  Hz, 2H, Ar), 7.50 (d,  $J = 8.4$  Hz, 2H, Ar), 7.54 (d,  $J = 8.0$  Hz, 2H, Ar);  $^{13}\text{C}$  NMR ( $\text{CDCl}_3$ , 100 MHz, TMS):  $\delta$  21.6, 26.4, 27.7, 60.4, 69.4, 81.0, 107.7, 115.6, 122.5, 123.2, 123.4, 127.1, 128.71, 128.76, 129.98, 130.04, 130.8, 131.0, 132.0, 132.8, 137.4, 142.5, 144.7, 146.4, 164.6, 173.9; HRMS (ESI) Calcd. For  $\text{C}_{32}\text{H}_{32}\text{BrN}_2\text{O}_5\text{S}^+$  ( $\text{M}+\text{H}$ ) $^+$  requires 635.1210, Found: 635.1224; IR ( $\text{CH}_2\text{Cl}_2$ ):  $\nu$  663, 705, 764, 814, 1010, 1085, 1150, 1170, 1365, 1393, 1491, 1611, 1717, 2930, 2976  $\text{cm}^{-1}$ .

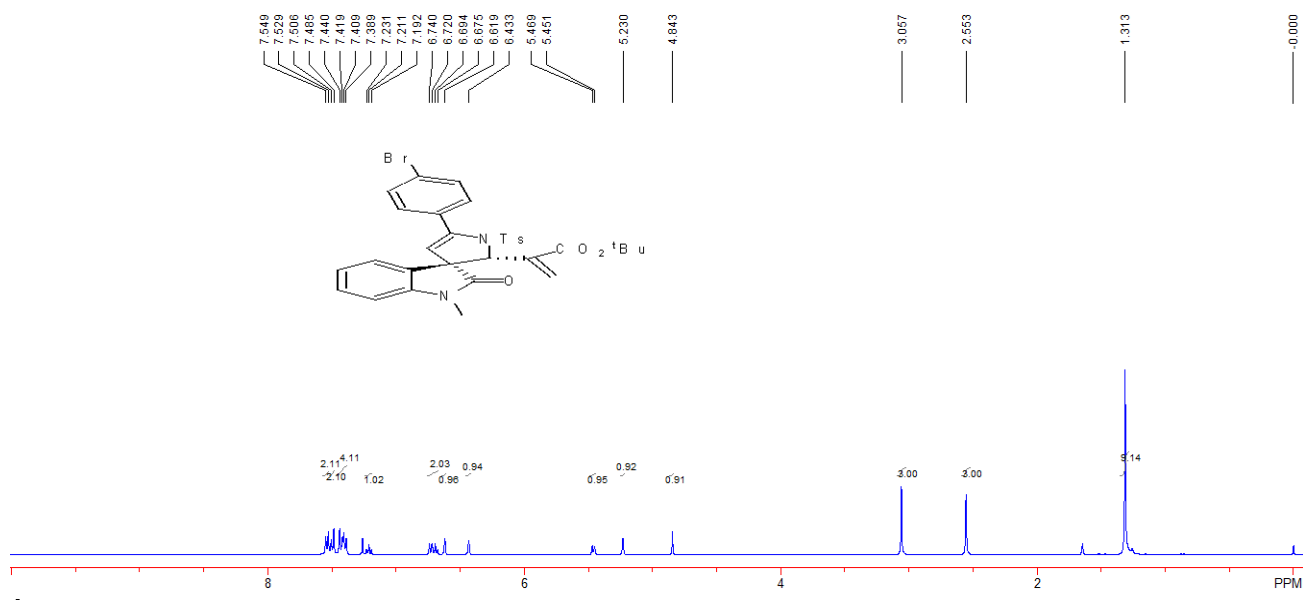

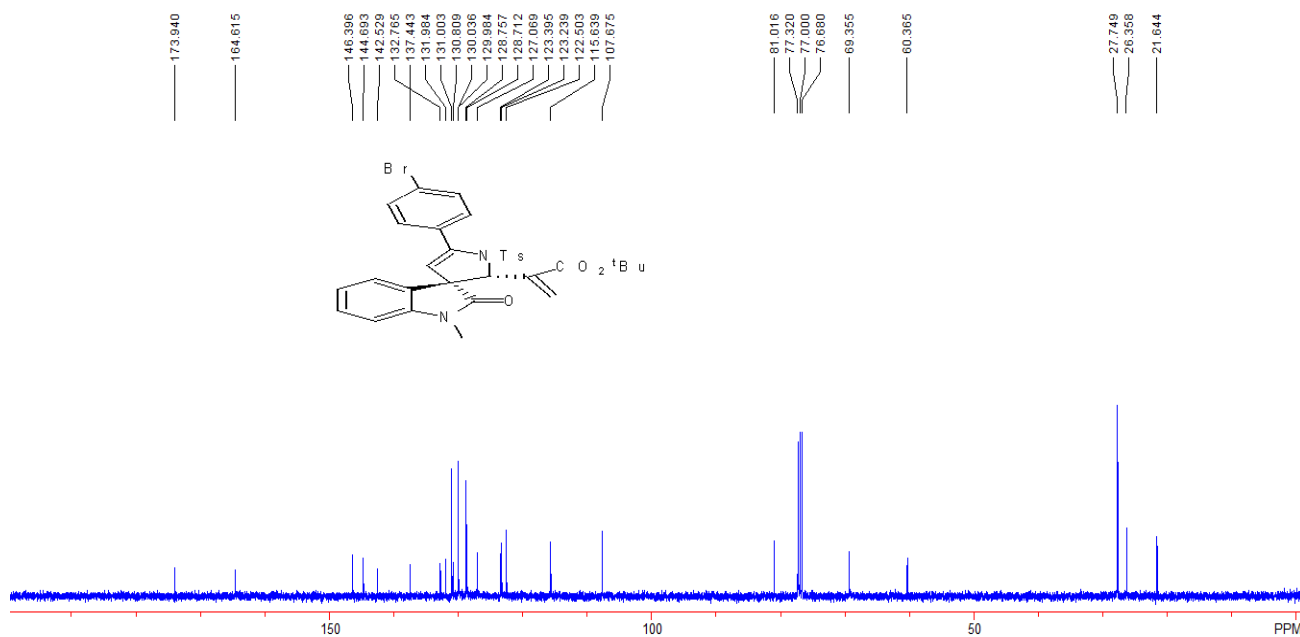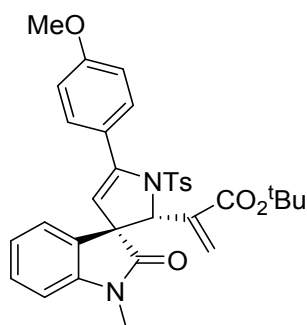

**Compound 3e:** A pale yellow solid, 111 mg, 95% yield; m.p. 167-168 °C;  $^1\text{H}$  NMR ( $\text{CDCl}_3$ , 400 MHz, TMS):  $\delta$  1.31 (s, 9H, 3 $\text{CH}_3$ ), 2.54 (s, 3H,  $\text{CH}_3$ ), 3.05 (s, 3H,  $\text{CH}_3$ ), 3.84 (s, 3H,  $\text{CH}_3$ ), 4.74 (s, 1H, CH), 5.22 (s, 1H, =CH), 5.46 (d,  $J = 7.2$  Hz, 1H, Ar), 6.46 (s, 1H, = $\text{CH}_2$ ), 6.63 (s, 1H, = $\text{CH}_2$ ), 6.66-6.73 (m, 2H, Ar), 6.88 (d,  $J = 8.8$  Hz, 2H, Ar), 7.20 (t,  $J = 7.6$  Hz, 1H, Ar), 7.38 (d,  $J = 8.0$  Hz, 2H, Ar), 7.49 (d,  $J = 8.4$  Hz, 2H, Ar), 7.55 (d,  $J = 8.0$  Hz, 2H, Ar);  $^{13}\text{C}$  NMR ( $\text{CDCl}_3$ , 100 MHz, TMS):  $\delta$  21.6, 26.3, 27.7, 55.2, 60.2, 69.3, 80.9, 107.5, 113.1, 113.7, 122.4, 123.2, 124.1, 127.0, 128.5, 128.8, 129.89, 129.94, 132.4, 133.1, 137.7, 142.5, 144.4, 147.1, 160.3, 164.7, 174.3; HRMS (ESI) Calcd. For  $\text{C}_{33}\text{H}_{35}\text{N}_2\text{O}_6\text{S}^+$  ( $\text{M}+\text{H}$ ) $^+$  requires 587.2210, Found: 587.2225; IR ( $\text{CH}_2\text{Cl}_2$ ):  $\nu$  663, 679, 706, 815, 837, 1031, 1086, 1149, 1169, 1250, 1364, 1510, 1609, 1716, 2931, 2975  $\text{cm}^{-1}$ .

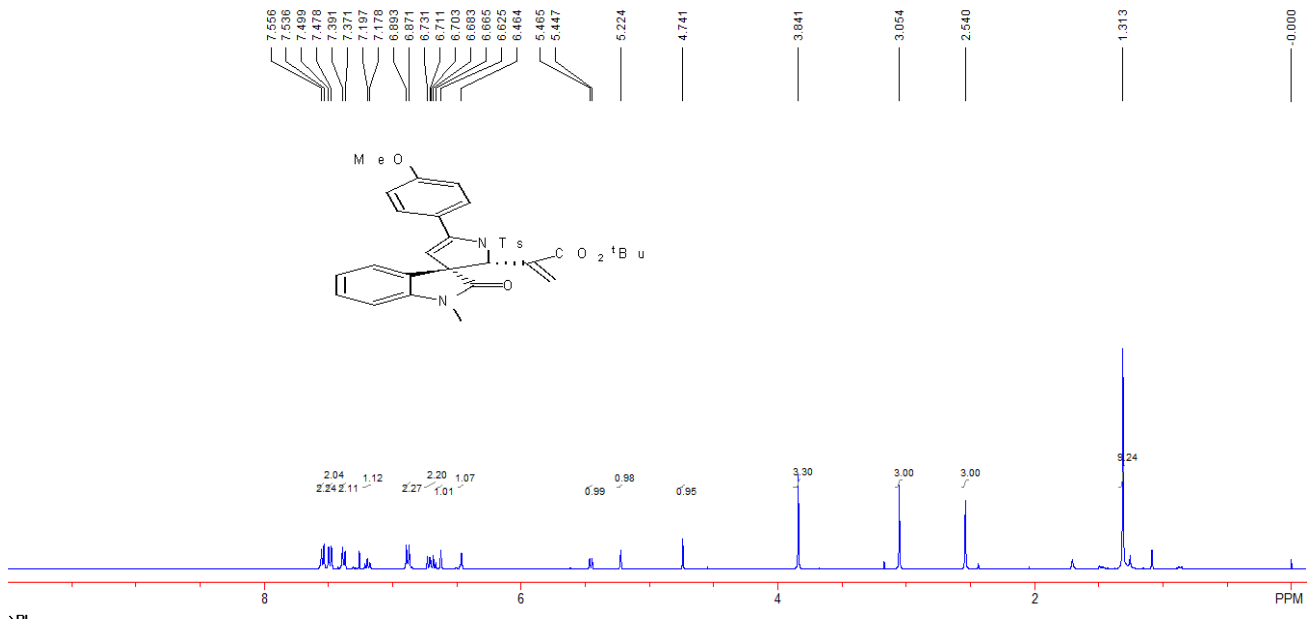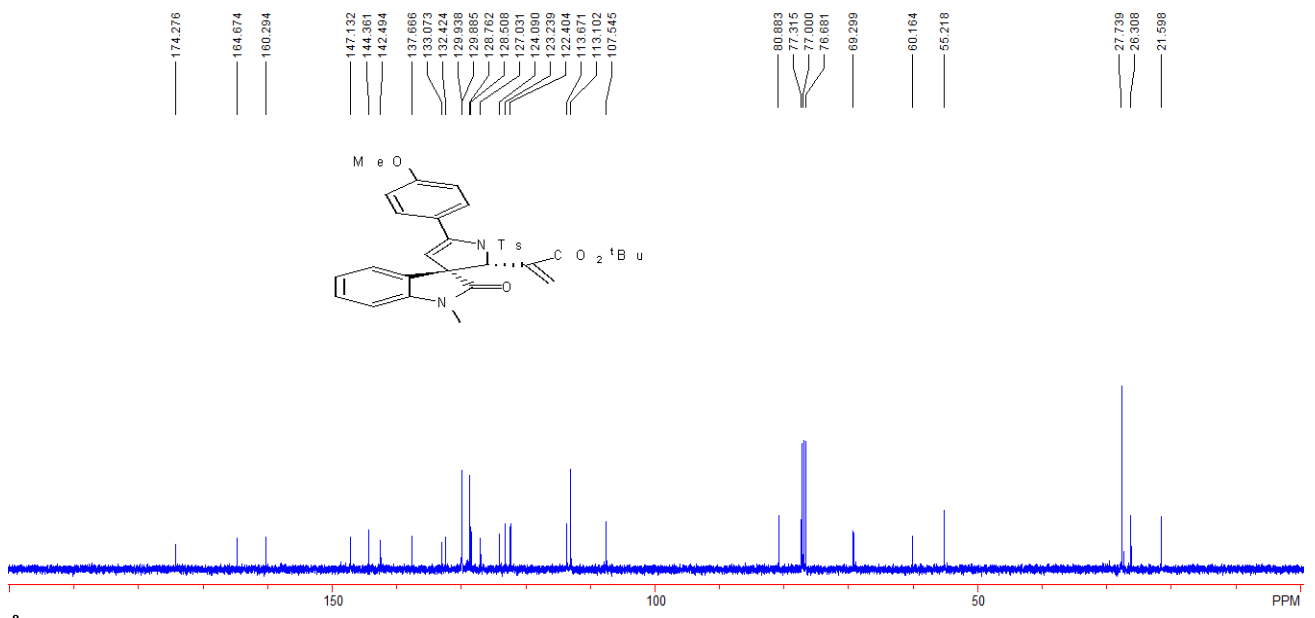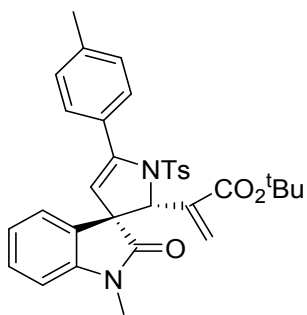

**Compound 3f:** A pale yellow solid, 98 mg, 86% yield; m.p. 126-127 °C; <sup>1</sup>H NMR (CDCl<sub>3</sub>, 400 MHz, TMS): δ 1.31 (s, 9H, 3CH<sub>3</sub>), 2.39 (s, 3H, CH<sub>3</sub>), 2.54 (s, 3H, CH<sub>3</sub>), 3.05 (s, 3H, CH<sub>3</sub>), 4.78 (s, 1H, CH), 5.21 (s, 1H, =CH), 5.42 (d, *J* = 7.6 Hz, 1H, Ar), 6.48 (s, 1H, =CH<sub>2</sub>), 6.63 (s, 1H, =CH<sub>2</sub>), 6.65-6.73 (m, 2H, Ar), 7.16-7.22 (m, 3H, Ar), 7.38 (d, *J* = 8.0 Hz, 2H, Ar), 7.45 (d, *J* = 7.6 Hz, 2H, Ar), 7.56 (d, *J* = 8.0 Hz, 2H, Ar); <sup>13</sup>C NMR (CDCl<sub>3</sub>, 100 MHz, TMS): δ 21.4, 21.6, 26.3, 27.8, 60.3, 69.3, 80.9, 107.5, 114.4, 122.4, 123.3, 127.1, 128.40, 128.46, 128.53, 128.8, 129.0, 129.9, 132.4, 133.0, 137.6, 139.3, 142.5, 144.4, 147.5, 164.7, 174.2; HRMS (ESI) Calcd. For C<sub>33</sub>H<sub>35</sub>N<sub>2</sub>O<sub>5</sub>S<sup>+</sup> (M+H)<sup>+</sup> requires 571.2261, Found: 571.2260; IR (CH<sub>2</sub>Cl<sub>2</sub>): ν 663, 679, 750, 813, 1034, 1086, 1148, 1170, 1364, 1491, 1610, 1716, 2927, 2976 cm<sup>-1</sup>.

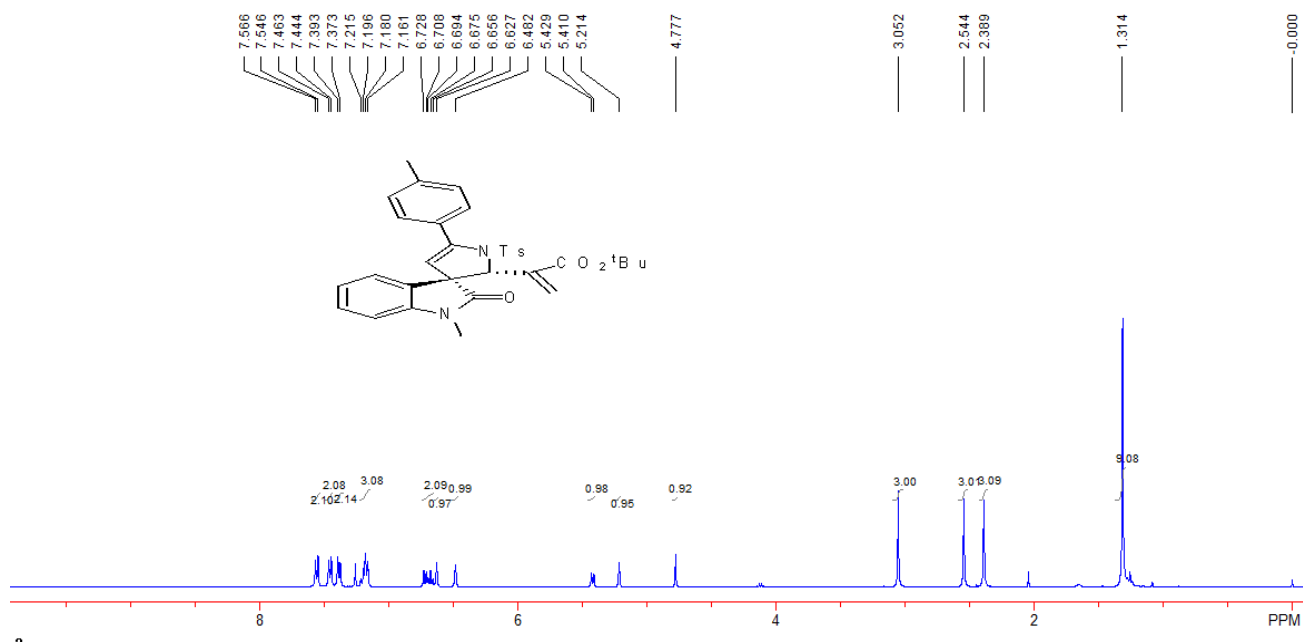

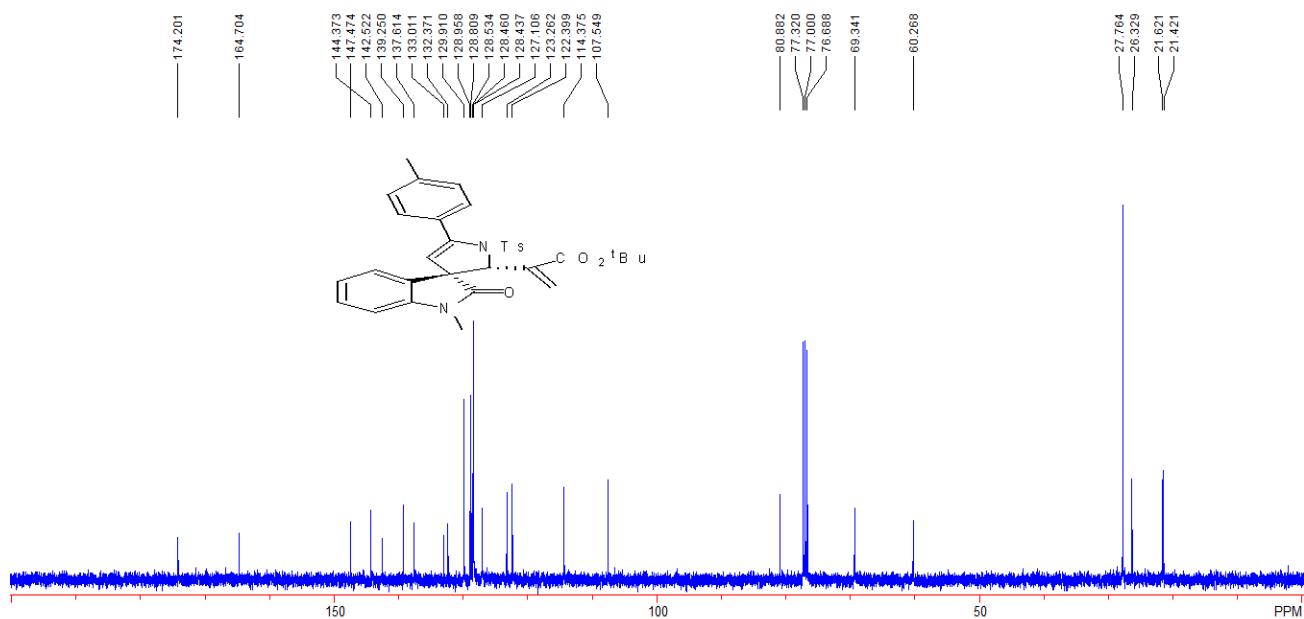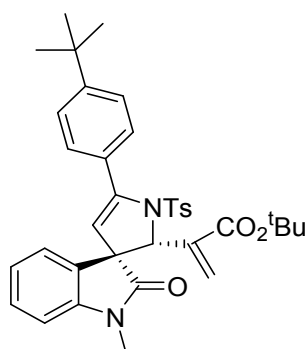

**Compound 3g:** A pale yellow solid, 107 mg, 88% yield; m.p. 116-117 °C;  $^1\text{H}$  NMR ( $\text{CDCl}_3$ , 400 MHz, TMS):  $\delta$  1.31 (s, 9H, 3CH<sub>3</sub>), 1.34 (s, 9H, 3CH<sub>3</sub>), 2.52 (s, 3H, CH<sub>3</sub>), 3.05 (s, 3H, CH<sub>3</sub>), 4.79 (s, 1H, CH), 5.29 (s, 1H, =CH), 5.66 (dd,  $J_1 = 7.6$  Hz,  $J_2 = 0.8$  Hz, 1H, Ar), 6.46 (s, 1H, =CH<sub>2</sub>), 6.62 (s, 1H, =CH<sub>2</sub>), 6.70-6.75 (m, 2H, Ar), 7.20 (dt,  $J_1 = 8.0$  Hz,  $J_2 = 0.8$  Hz, 1H, Ar), 7.32-7.36 (m, 4H, Ar), 7.45 (d,  $J = 8.4$  Hz, 2H, Ar), 7.53 (d,  $J = 8.0$  Hz, 2H, Ar);  $^{13}\text{C}$  NMR ( $\text{CDCl}_3$ , 100 MHz, TMS):  $\delta$  21.6, 26.3, 27.7, 31.2, 34.6, 60.2, 69.2, 80.8, 107.5, 114.7, 122.5, 123.3, 124.6, 126.9, 128.2, 128.5, 128.7, 128.8, 129.8, 132.3, 133.3, 137.7, 142.5, 144.3, 147.4, 152.2, 164.6, 174.2; HRMS (ESI) Calcd. For  $\text{C}_{36}\text{H}_{41}\text{N}_2\text{O}_5\text{S}^+$  ( $\text{M}+\text{H}$ )<sup>+</sup> requires 613.2731, Found: 613.2751; IR ( $\text{CH}_2\text{Cl}_2$ ):  $\nu$  663, 678, 750, 814, 1018, 1086, 1150, 1171, 1365, 1470, 1492, 1611, 1718, 2930, 2963  $\text{cm}^{-1}$ .

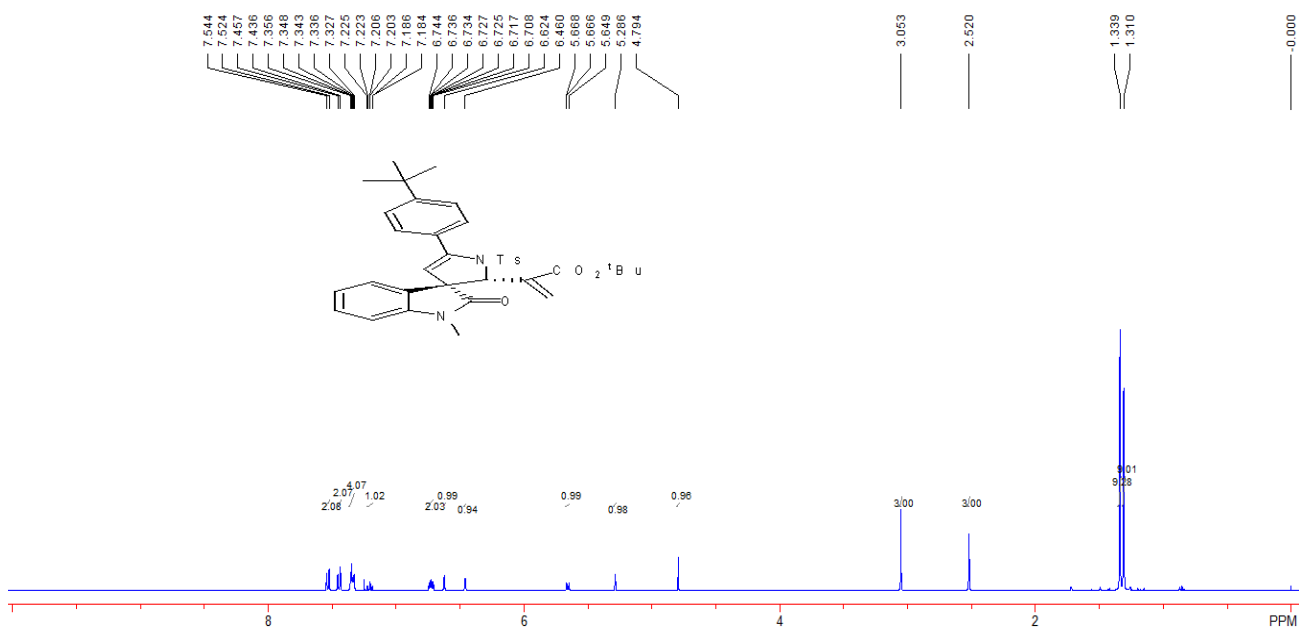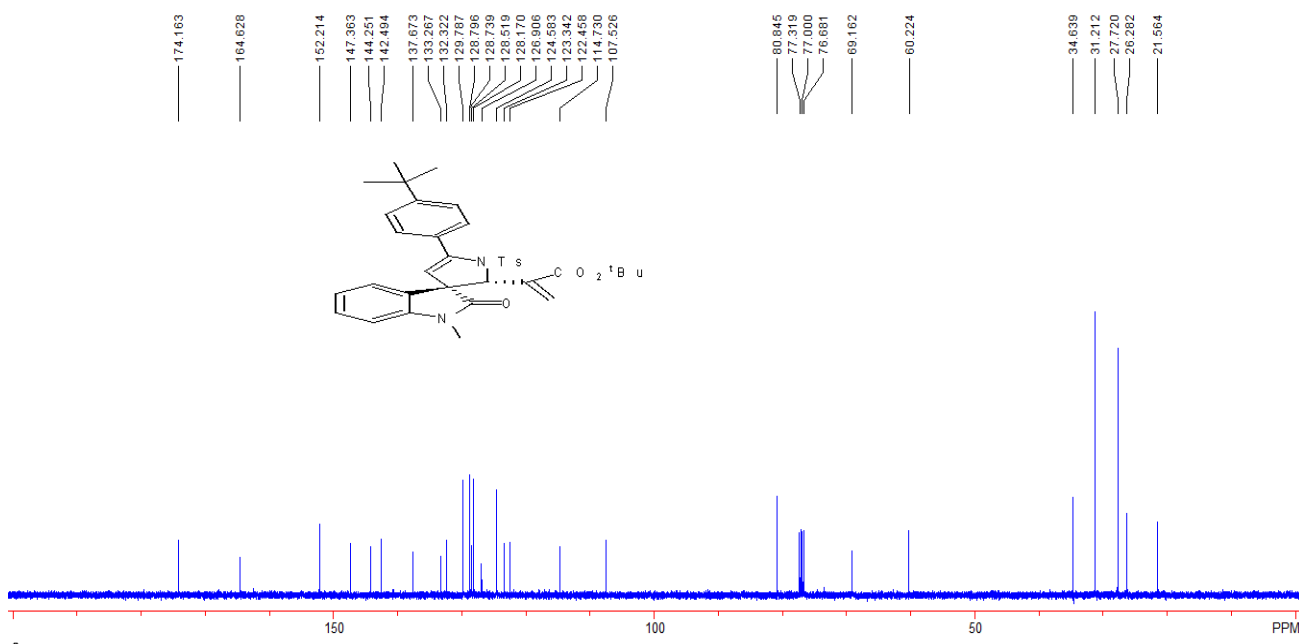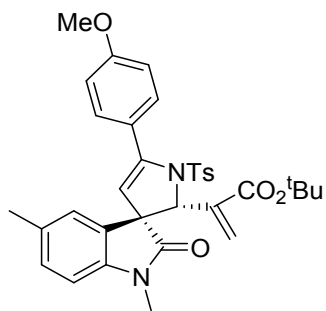



**Compound 3h:** A pale yellow solid, 105 mg, 88% yield; m.p. 158-159 °C; <sup>1</sup>H NMR (CDCl<sub>3</sub>, 400 MHz, TMS): δ 1.30 (s, 9H, 3CH<sub>3</sub>), 2.08 (s, 3H, CH<sub>3</sub>), 2.51 (s, 3H, CH<sub>3</sub>), 3.03 (s, 3H, CH<sub>3</sub>), 3.84 (s, 3H, CH<sub>3</sub>), 4.72 (s, 1H, CH), 5.21 (s, 1H, =CH), 5.37 (s, 1H, Ar), 6.50 (s, 1H, =CH<sub>2</sub>), 6.61 (d, *J* = 8.0 Hz, 1H, Ar), 6.64 (s, 1H, =CH<sub>2</sub>), 6.90 (d, *J* = 8.8 Hz, 2H, Ar), 7.00 (d, *J* = 8.0 Hz, 1H, Ar), 7.39 (d, *J* = 8.0 Hz, 2H, Ar), 7.53 (d, *J* = 8.8 Hz, 2H, Ar), 7.57 (d, *J* = 8.0 Hz, 2H, Ar); <sup>13</sup>C NMR (CDCl<sub>3</sub>, 100 MHz, TMS): δ 21.1, 21.8, 26.3, 27.7, 55.2, 60.3, 69.4, 80.8, 107.3, 113.1, 114.0, 123.8, 124.1, 127.2, 128.80, 128.85, 129.8, 130.0, 131.9, 132.5, 132.9, 137.7, 140.2, 144.3, 147.0, 160.3, 164.7, 174.2; HRMS (ESI) Calcd. For C<sub>34</sub>H<sub>37</sub>N<sub>2</sub>O<sub>6</sub>S<sup>+</sup> (M+H)<sup>+</sup> requires 601.2367, Found: 601.2364; IR (CH<sub>2</sub>Cl<sub>2</sub>): ν 662, 705, 763, 809, 835, 1031, 1088, 1149, 1169, 1250, 1362, 1499, 1510, 1606, 1713, 2926, 2974 cm<sup>-1</sup>.

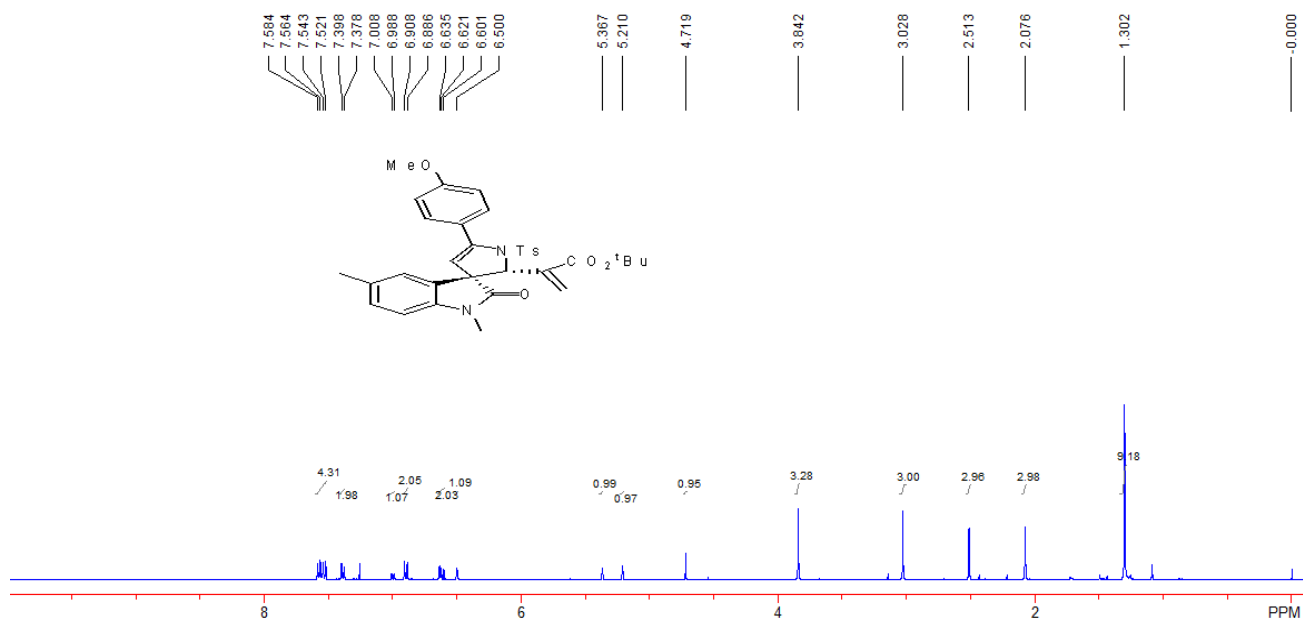

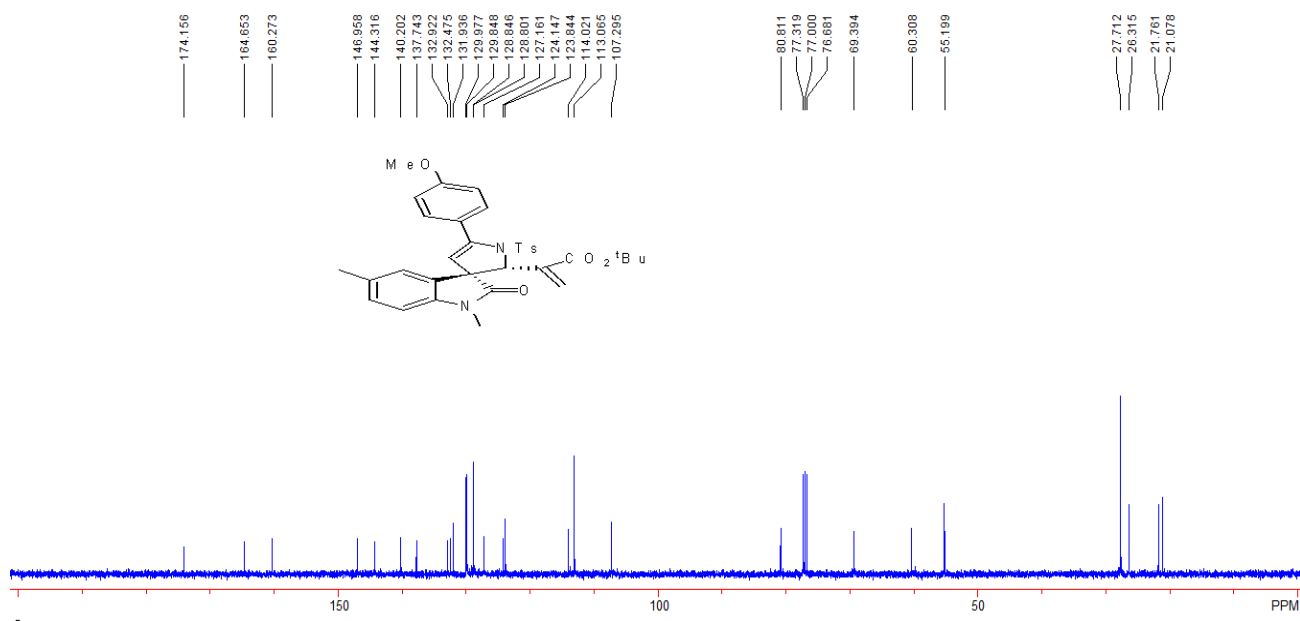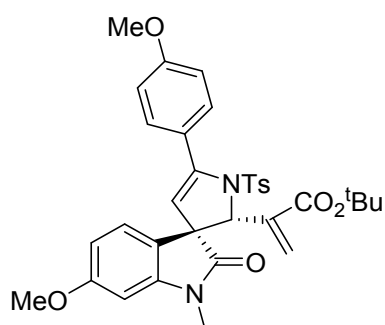

**Compound 3i:** A pale yellow solid, 103 mg, 84% yield; m.p. 188-189 °C;  $^1\text{H}$  NMR ( $\text{CDCl}_3$ , 400 MHz, TMS):  $\delta$  1.35 (s, 9H, 3 $\text{CH}_3$ ), 2.54 (s, 3H,  $\text{CH}_3$ ), 3.03 (s, 3H,  $\text{CH}_3$ ), 3.79 (s, 3H,  $\text{CH}_3$ ), 3.84 (s, 3H,  $\text{CH}_3$ ), 4.74 (s, 1H, CH), 5.20 (s, 1H, =CH), 5.40 (d,  $J = 8.4$  Hz, 1H, Ar), 6.17 (dd,  $J_1 = 8.0$  Hz,  $J_2 = 2.0$  Hz, 1H, Ar), 6.31 (d,  $J = 2.4$  Hz, 1H, Ar), 6.44 (s, 1H, = $\text{CH}_2$ ), 6.60 (s, 1H, = $\text{CH}_2$ ), 6.88 (d,  $J = 8.8$  Hz, 2H, Ar), 7.37 (d,  $J = 8.4$  Hz, 2H, Ar), 7.47 (d,  $J = 8.4$  Hz, 2H, Ar), 7.54 (d,  $J = 8.0$  Hz, 2H, Ar);  $^{13}\text{C}$  NMR ( $\text{CDCl}_3$ , 100 MHz, TMS):  $\delta$  21.6, 26.3, 27.8, 55.2, 55.4, 59.8, 69.5, 80.9, 95.3, 106.4, 113.1, 114.0, 124.0, 124.2, 124.5, 126.8, 128.7, 129.87, 129.93, 133.3, 137.8, 143.8, 144.2, 146.7, 160.3, 160.4, 164.8, 174.9; HRMS (ESI) Calcd. For  $\text{C}_{34}\text{H}_{37}\text{N}_2\text{O}_7\text{S}^+$  ( $\text{M}+\text{H}$ ) $^+$  requires 617.2316, Found: 617.2314; IR ( $\text{CH}_2\text{Cl}_2$ ):  $\nu$  663, 677, 815, 834, 1032, 1087, 1150, 1171, 1251, 1366, 1459, 1508, 1624, 1719, 2926, 2951  $\text{cm}^{-1}$ .

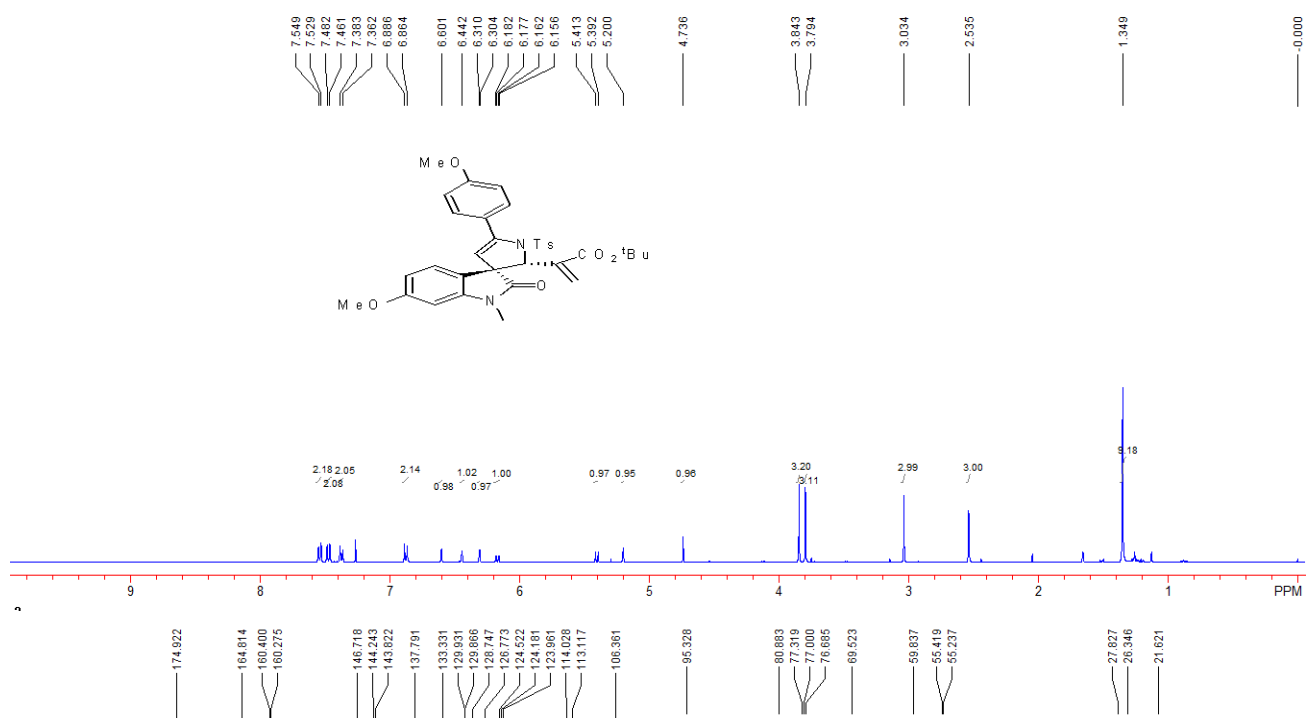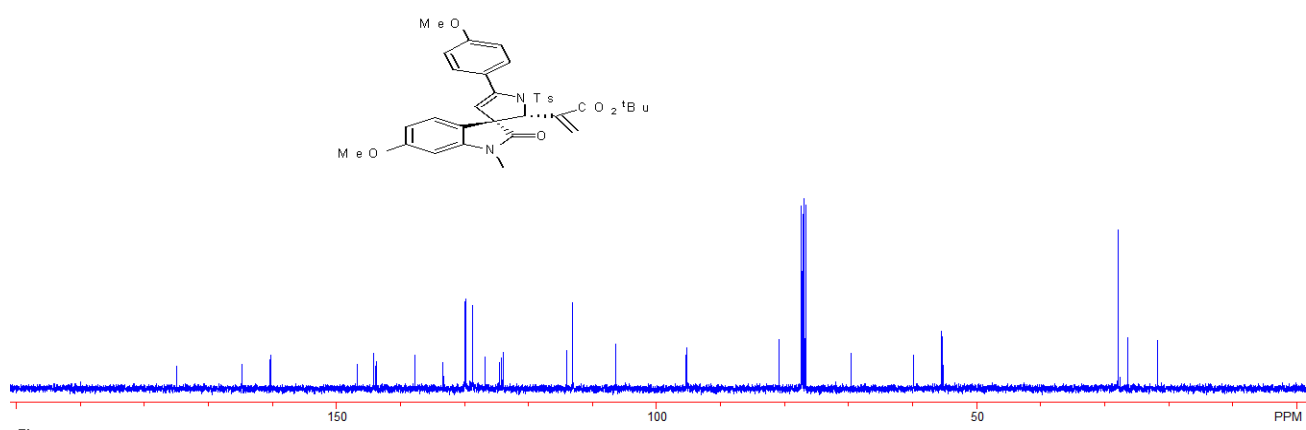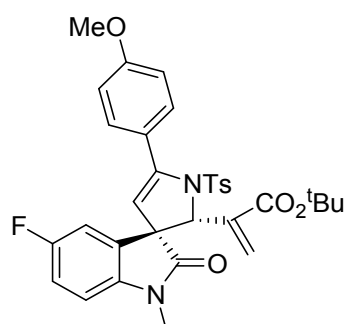

**Compound 3j:** A pale yellow solid, 76 mg, 63% yield; m.p. 173-174 °C; <sup>1</sup>H NMR (CDCl<sub>3</sub>, 400 MHz, TMS): δ 1.35 (s, 9H, 3CH<sub>3</sub>), 2.53 (s, 3H, CH<sub>3</sub>), 3.03 (s, 3H, CH<sub>3</sub>), 3.85 (s, 3H, CH<sub>3</sub>), 4.71 (s, 1H, CH), 4.79 (d, *J* = 7.2 Hz, 1H, Ar), 5.09 (s, 1H, =CH), 6.52 (s, 1H, =CH<sub>2</sub>), 6.60-6.64 (m, 2H, =CH<sub>2</sub>,

Ar), 6.87 (d,  $J = 8.0$  Hz, 1H, Ar), 6.92 (d,  $J = 8.0$  Hz, 2H, Ar), 7.42 (d,  $J = 8.0$  Hz, 2H, Ar), 7.55 (d,  $J = 8.8$  Hz, 2H, Ar), 7.57 (d,  $J = 8.4$  Hz, 2H, Ar);  $^{13}\text{C}$  NMR ( $\text{CDCl}_3$ , 100 MHz, TMS):  $\delta$  21.5, 26.4, 27.8, 55.2, 60.5, 69.2, 81.0, 107.9 (d,  $J = 8.2$  Hz), 111.3 (d,  $J = 25.3$  Hz), 113.0, 113.2, 114.6 (d,  $J = 23.0$  Hz), 124.0, 127.3, 128.6, 130.0, 130.2, 132.1, 133.9 (d,  $J = 8.1$  Hz), 137.4, 138.4, 145.5, 147.6, 159.2 (d,  $J = 238.7$  Hz), 160.5, 164.9, 174.0;  $^{19}\text{F}$  NMR ( $\text{CDCl}_3$ , 376 MHz,  $\text{CFCl}_3$ ):  $\delta$  -120.01 - 119.98 (m); HRMS (ESI) Calcd. For  $\text{C}_{33}\text{H}_{34}\text{FN}_2\text{O}_6\text{S}^+$  ( $\text{M}+\text{H}$ ) $^+$  requires 605.2116, Found: 605.2115. IR ( $\text{CH}_2\text{Cl}_2$ ):  $\nu$  662, 706, 812, 836, 1032, 1087, 1149, 1171, 1251, 1365, 1494, 1510, 1608, 1719, 2926, 2977  $\text{cm}^{-1}$ .

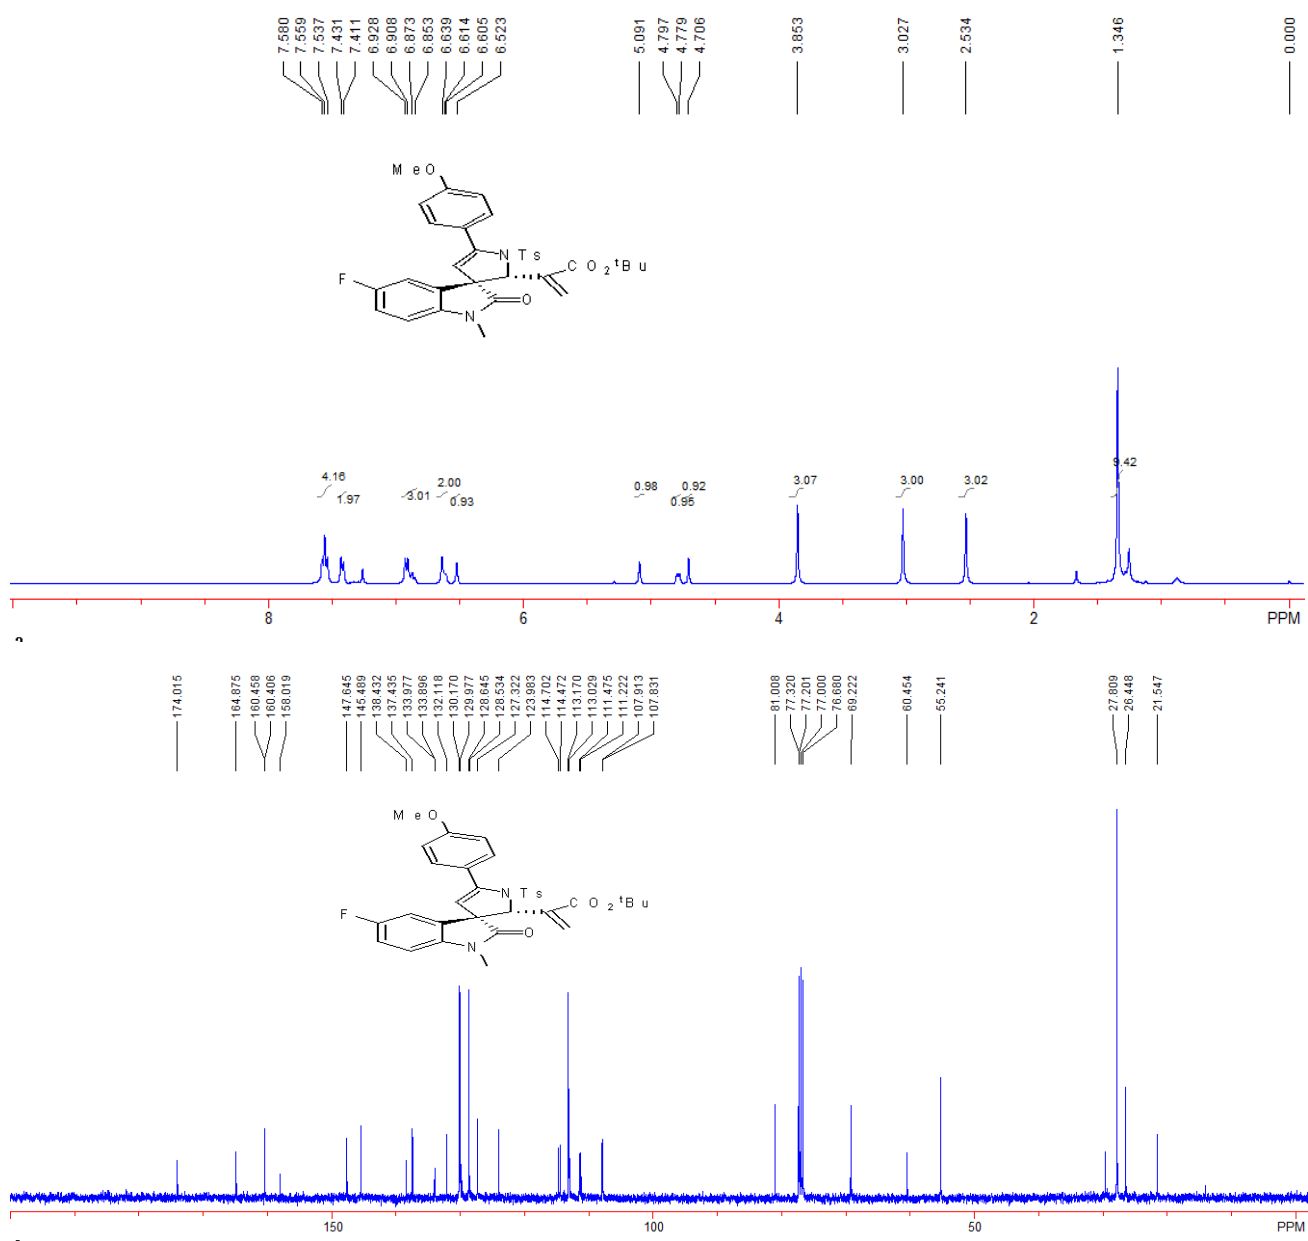

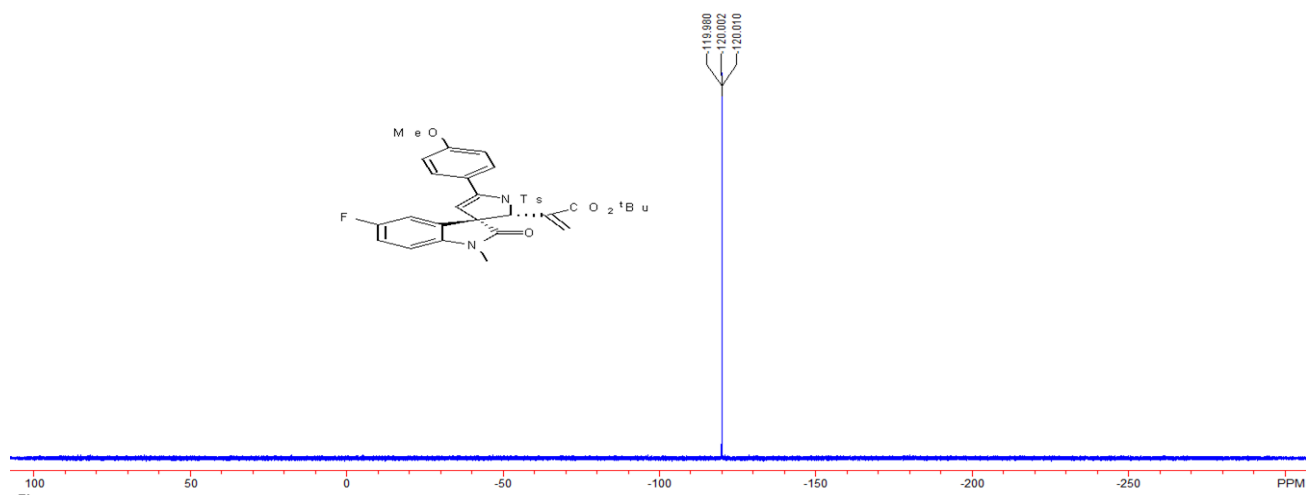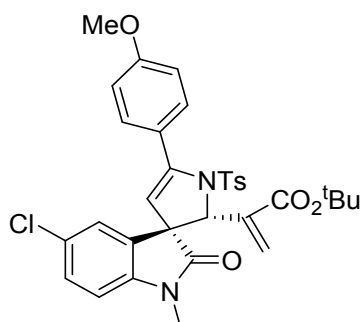

**Compound 3k:** A pale yellow solid, 80 mg, 65% yield; m.p. 168-169 °C;  $^1\text{H}$  NMR ( $\text{CDCl}_3$ , 400 MHz, TMS):  $\delta$  1.34 (s, 9H, 3 $\text{CH}_3$ ), 2.53 (s, 3H,  $\text{CH}_3$ ), 3.03 (s, 3H,  $\text{CH}_3$ ), 3.86 (s, 3H,  $\text{CH}_3$ ), 4.68 (s, 1H, CH), 5.13 (s, 1H, =CH), 5.28 (d,  $J = 1.6$  Hz, 1H, Ar), 6.54 (s, 1H, = $\text{CH}_2$ ), 6.63-6.65 (m, 2H, = $\text{CH}_2$ , Ar), 6.92 (d,  $J = 8.8$  Hz, 2H, Ar), 7.17 (dd,  $J_1 = 8.0$  Hz,  $J_2 = 1.6$  Hz, 1H, Ar), 7.43 (d,  $J = 8.0$  Hz, 2H, Ar), 7.56 (d,  $J = 8.4$  Hz, 2H, Ar), 7.57 (d,  $J = 7.6$  Hz, 2H, Ar);  $^{13}\text{C}$  NMR ( $\text{CDCl}_3$ , 100 MHz, TMS):  $\delta$  22.0, 26.4, 27.8, 55.3, 60.4, 69.3, 81.0, 108.5, 112.9, 113.2, 123.6, 124.0, 127.6, 127.9, 128.5, 128.6, 130.0, 130.2, 132.1, 134.1, 137.4, 141.2, 145.3, 147.8, 160.5, 164.9, 173.9; HRMS (ESI) Calcd. For  $\text{C}_{33}\text{H}_{34}\text{ClN}_2\text{O}_6\text{S}^+$  ( $\text{M}+\text{H}$ ) $^+$  requires 621.1821, Found: 621.1820; IR ( $\text{CH}_2\text{Cl}_2$ ):  $\nu$  661, 728, 814, 836, 1032, 1097, 1150, 1171, 1251, 1365, 1490, 1510, 1608, 1722, 2925, 2955  $\text{cm}^{-1}$ .

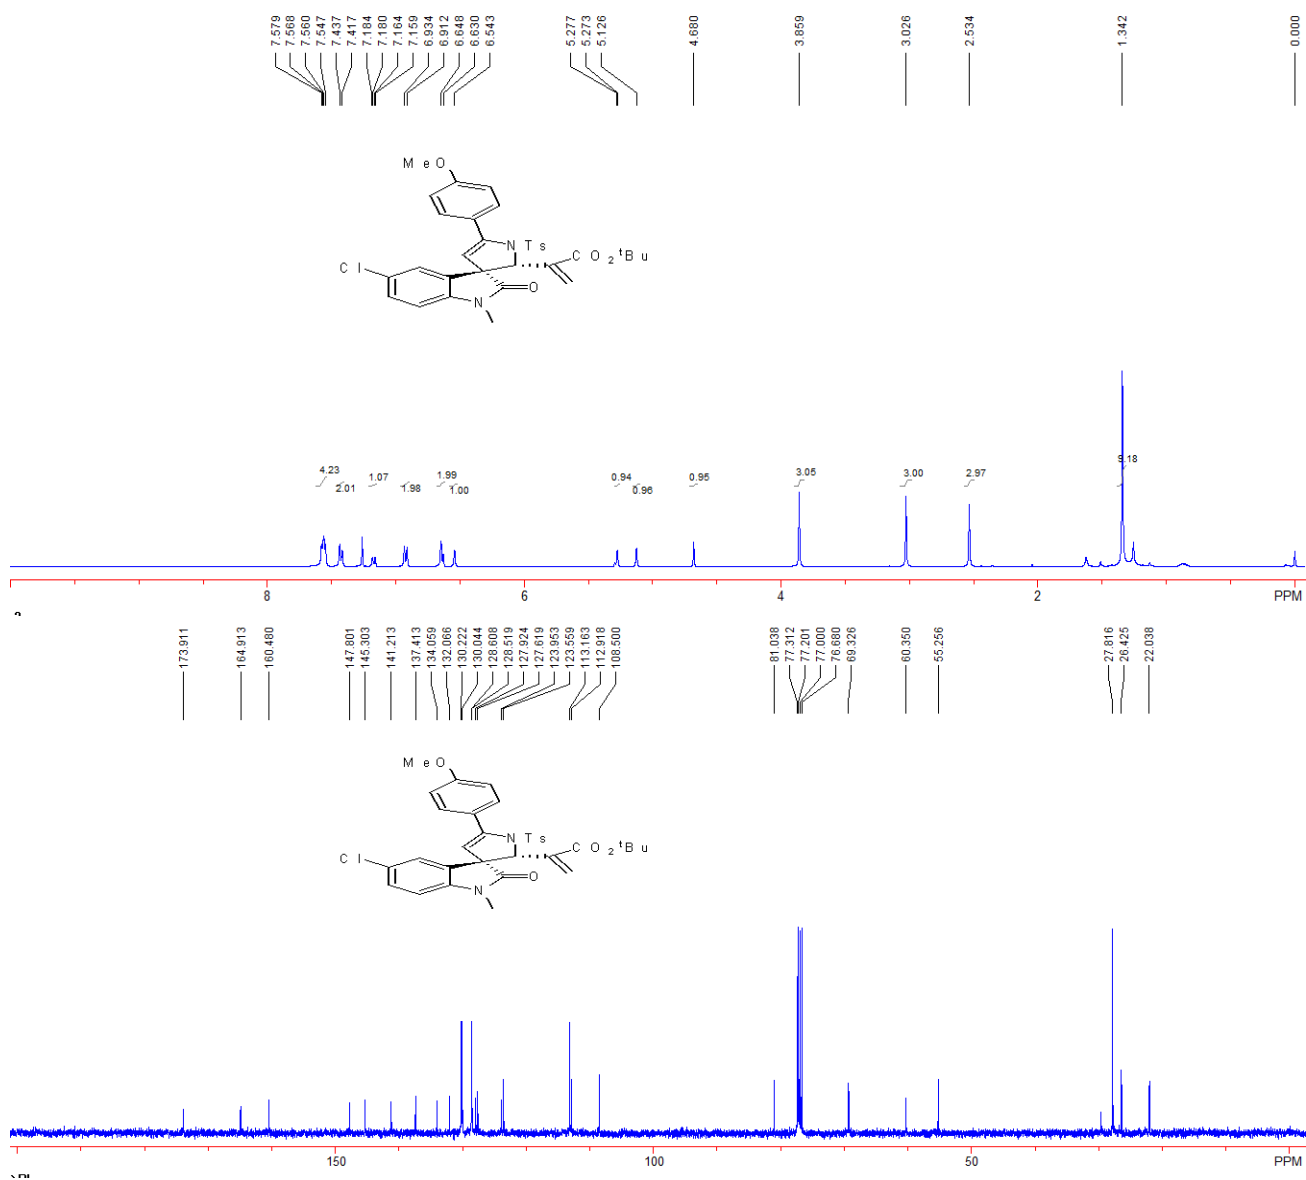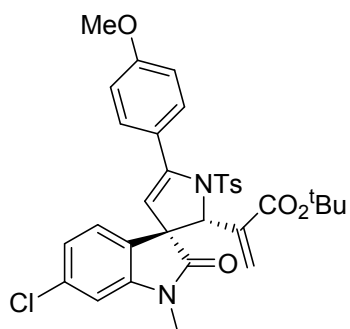

**Compound 3I:** A pale yellow solid, 67 mg, 54% yield; m.p. 186-187 °C; <sup>1</sup>H NMR (CDCl<sub>3</sub>, 400 MHz, TMS): δ 1.37 (s, 9H, 3CH<sub>3</sub>), 2.55 (s, 3H, CH<sub>3</sub>), 3.03 (s, 3H, CH<sub>3</sub>), 3.85 (s, 3H, CH<sub>3</sub>), 4.71 (s, 1H, CH), 5.17 (s, 1H, =CH), 5.33 (d, *J* = 8.0 Hz, 1H, Ar), 6.47 (s, 1H, =CH<sub>2</sub>), 6.62 (s, 1H, =CH<sub>2</sub>), 6.63 (d,

$J = 1.6$  Hz, 1H, Ar), 6.72 (d,  $J = 1.6$  Hz, 1H, Ar), 6.89 (d,  $J = 8.8$  Hz, 2H, Ar), 7.38 (d,  $J = 8.0$  Hz, 2H, Ar), 7.48 (d,  $J = 8.8$  Hz, 2H, Ar), 7.54 (d,  $J = 8.4$  Hz, 2H, Ar);  $^{13}\text{C}$  NMR ( $\text{CDCl}_3$ , 100 MHz, TMS):  $\delta$  21.6, 26.4, 27.8, 55.2, 59.8, 69.3, 81.1, 108.3, 113.2, 122.1, 123.9, 124.2, 127.1, 128.7, 129.9, 130.8, 133.1, 134.3, 137.4, 143.7, 144.5, 147.4, 160.4, 164.9, 174.3; HRMS (ESI) Calcd. For  $\text{C}_{33}\text{H}_{34}\text{ClN}_2\text{O}_6\text{S}^+$  ( $\text{M}+\text{H}$ ) $^+$  requires 621.1821, Found: 621.1817; IR ( $\text{CH}_2\text{Cl}_2$ ):  $\nu$  661, 672, 735, 813, 1031, 1087, 1150, 1170, 1249, 1365, 1510, 1606, 1722, 2923, 2954  $\text{cm}^{-1}$ .

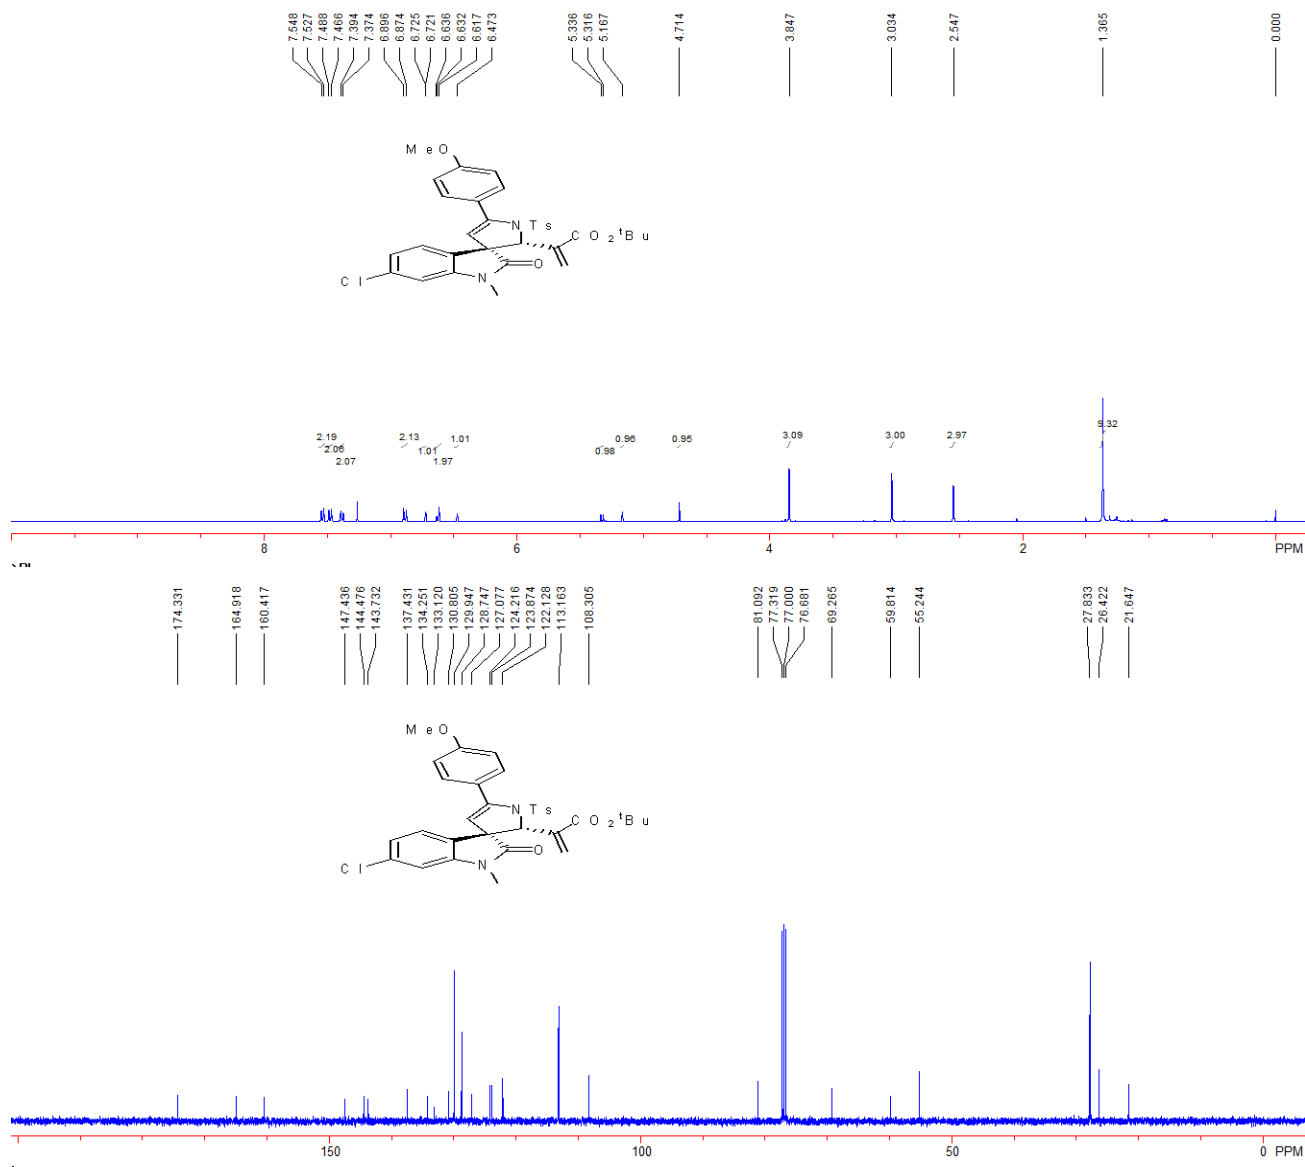

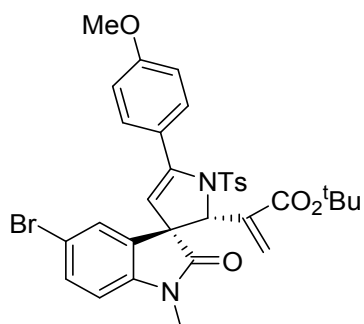

**Compound 3m:** A pale yellow solid, 90 mg, 68% yield; m.p. 192-193 °C;  $^1\text{H}$  NMR ( $\text{CDCl}_3$ , 400 MHz, TMS):  $\delta$  1.34 (s, 9H, 3CH<sub>3</sub>), 2.55 (s, 3H, CH<sub>3</sub>), 3.02 (s, 3H, CH<sub>3</sub>), 3.86 (s, 3H, CH<sub>3</sub>), 4.67 (s, 1H, CH), 5.16 (s, 1H, =CH), 5.57 (s, 1H, Ar), 6.54 (s, 1H, =CH<sub>2</sub>), 6.60 (d,  $J$  = 8.0 Hz, 1H, Ar), 6.65 (s, 1H, =CH<sub>2</sub>), 6.92 (d,  $J$  = 8.4 Hz, 2H, Ar), 7.33 (d,  $J$  = 8.4 Hz, 1H, Ar), 7.43 (d,  $J$  = 8.0 Hz, 2H, Ar), 7.54-7.57 (m, 4H, Ar);  $^{13}\text{C}$  NMR ( $\text{CDCl}_3$ , 100 MHz, TMS):  $\delta$  22.3, 26.4, 27.8, 55.3, 60.4, 69.4, 81.1, 109.1, 112.9, 113.2, 115.3, 123.9, 126.2, 127.7, 128.6, 130.1, 130.3, 131.5, 132.1, 134.4, 137.4, 141.8, 145.2, 147.9, 160.5, 164.9, 173.8; HRMS (ESI) Calcd. For  $\text{C}_{33}\text{H}_{34}\text{BrN}_2\text{O}_6\text{S}^+$  ( $\text{M}+\text{H}$ )<sup>+</sup> requires 665.1315, Found: 665.1312; IR ( $\text{CH}_2\text{Cl}_2$ ):  $\nu$  661, 728, 814, 1032, 1093, 1151, 1171, 1251, 1365, 1461, 1510, 1607, 1723, 2922, 2954  $\text{cm}^{-1}$ .

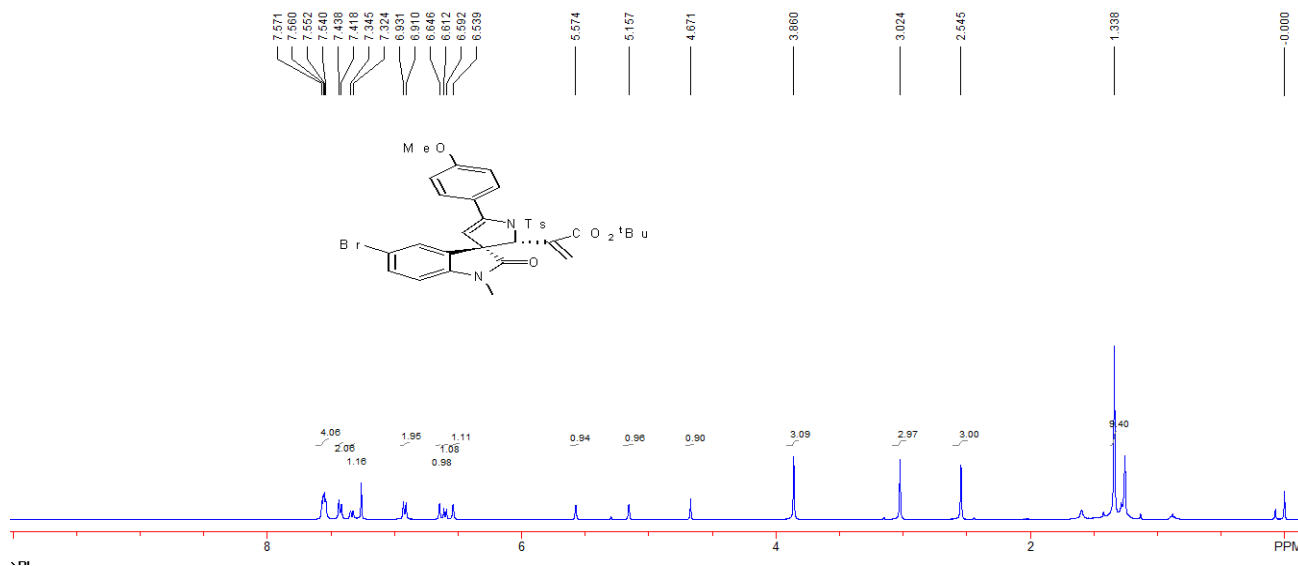



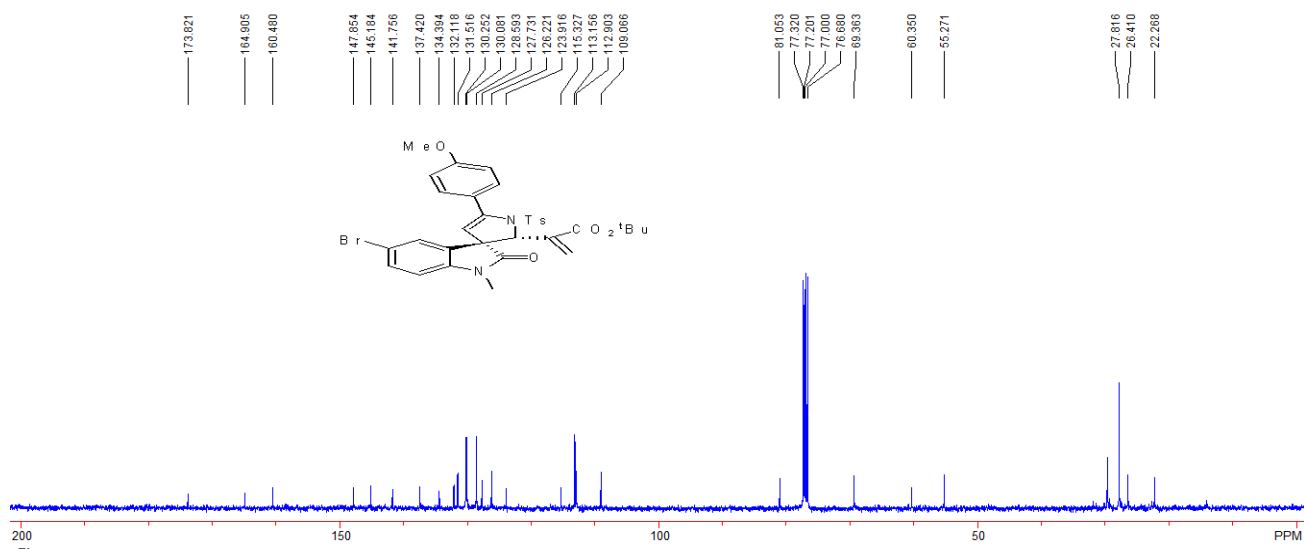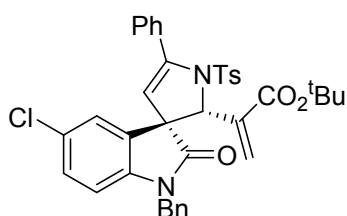

**Compound 3n:** A pale yellow solid, 83 mg, 62% yield; m.p. 177-178 °C;  $^1\text{H}$  NMR ( $\text{CDCl}_3$ , 400 MHz, TMS):  $\delta$  1.32 (s, 9H, 3 $\text{CH}_3$ ), 2.52 (s, 3H,  $\text{CH}_3$ ), 4.43 (d,  $J = 15.6$  Hz, 1H,  $\text{CH}_2$ ), 4.81 (s, 1H, CH), 4.98 (d,  $J = 15.6$  Hz, 1H,  $\text{CH}_2$ ), 5.21 (s, 1H, =CH), 5.35 (d,  $J = 2.0$  Hz, 1H, Ar), 6.51 (d,  $J = 8.4$  Hz, 1H, Ar), 6.60 (s, 1H, = $\text{CH}_2$ ), 6.71 (s, 1H, = $\text{CH}_2$ ), 7.04 (dd,  $J_1 = 8.4$  Hz,  $J_2 = 2.0$  Hz, 1H, Ar), 7.17-7.23 (m, 5H, Ar), 7.39-7.44 (m, 5H, Ar), 7.57-7.65 (m, 4H, Ar);  $^{13}\text{C}$  NMR ( $\text{CDCl}_3$ , 100 MHz, TMS):  $\delta$  22.0, 27.8, 44.1, 60.6, 69.2, 81.2, 109.7, 114.6, 123.7, 127.3, 127.7, 127.8, 128.1, 128.2, 128.5, 128.6, 128.7, 128.8, 129.5, 130.2, 131.7, 131.9, 133.8, 135.2, 137.2, 140.2, 145.4, 148.2, 164.9, 174.0; HRMS (ESI) Calcd. For  $\text{C}_{38}\text{H}_{36}\text{ClN}_2\text{O}_5\text{S}^+$  ( $\text{M}+\text{H}$ ) $^+$  requires 667.2028, Found: 667.2023; IR ( $\text{CH}_2\text{Cl}_2$ ):  $\nu$  685, 758, 815, 1089, 1158, 1327, 1445, 1475, 1548, 1607, 1716, 2920, 2954  $\text{cm}^{-1}$ .

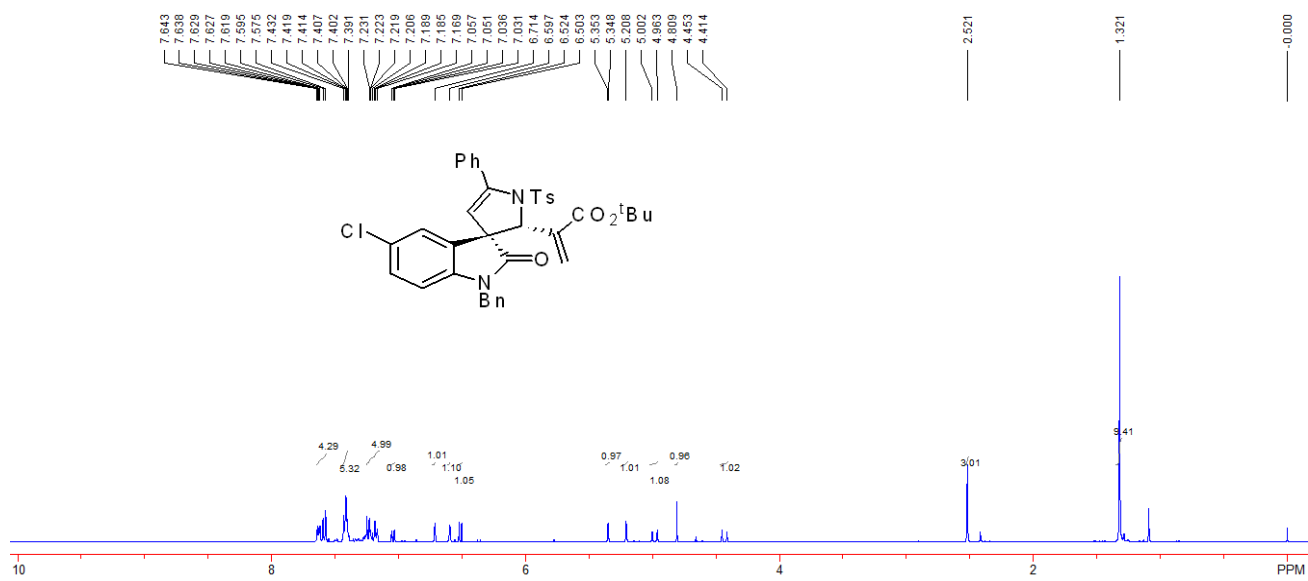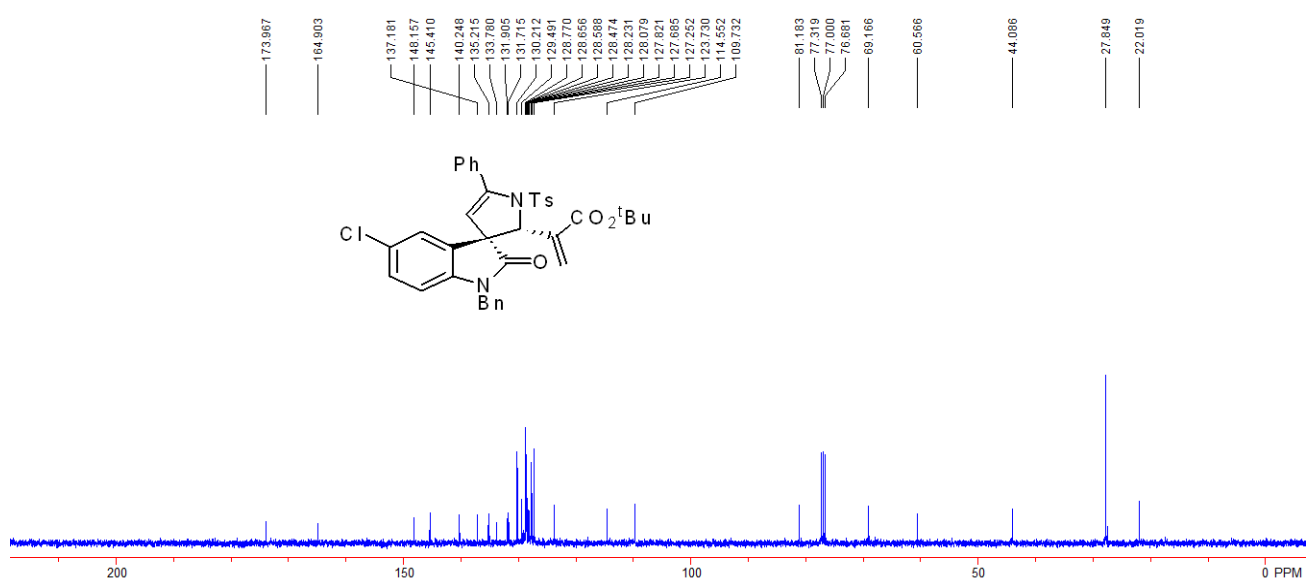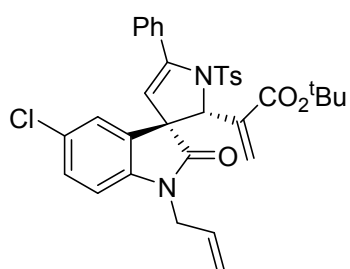

**Compound 30:** A pale yellow solid, 84 mg, 68% yield; m.p. 103-104 °C; <sup>1</sup>H NMR (CDCl<sub>3</sub>, 400 MHz, TMS): δ 1.34 (s, 9H, 3CH<sub>3</sub>), 2.53 (s, 3H, CH<sub>3</sub>), 4.04 (dd, *J*<sub>1</sub> = 16.0 Hz, *J*<sub>2</sub> = 5.2 Hz, 1H, CH<sub>2</sub>), 4.25 (dd, *J*<sub>1</sub> = 16.4 Hz, *J*<sub>2</sub> = 5.2 Hz, 1H, CH<sub>2</sub>), 4.78 (s, 1H, CH), 5.14 (d, *J* = 2.0 Hz, 1H, =CH), 5.17

(d,  $J = 3.6$  Hz, 2H, =CH<sub>2</sub>), 5.35 (d,  $J = 2.0$  Hz, 1H, Ar), 5.64-5.74 (m, 1H, =CH), 6.56 (s, 1H, =CH<sub>2</sub>), 6.66 (d,  $J = 8.4$  Hz, 1H, Ar), 6.67 (s, 1H, =CH<sub>2</sub>), 7.13 (dd,  $J_1 = 8.0$  Hz,  $J_2 = 2.0$  Hz, 1H, Ar), 7.39-7.44 (m, 5H, Ar), 7.56-7.64 (m, 4H, Ar); <sup>13</sup>C NMR (CDCl<sub>3</sub>, 100 MHz, TMS):  $\delta$  22.0, 27.9, 42.7, 60.4, 69.2, 81.1, 109.6, 114.5, 118.0, 123.7, 127.8, 128.0, 128.1, 128.50, 128.56, 128.65, 129.5, 130.2, 131.0, 131.7, 131.9, 133.8, 137.1, 140.4, 145.4, 148.1, 164.9, 173.4; HRMS (ESI) Calcd. For C<sub>34</sub>H<sub>34</sub>ClN<sub>2</sub>O<sub>5</sub>S<sup>+</sup> (M+H)<sup>+</sup> requires 617.1871, Found: 617.1868; IR (CH<sub>2</sub>Cl<sub>2</sub>):  $\nu$  659, 695, 736, 753, 814, 1149, 1170, 1346, 1365, 1484, 1718, 2971 cm<sup>-1</sup>.

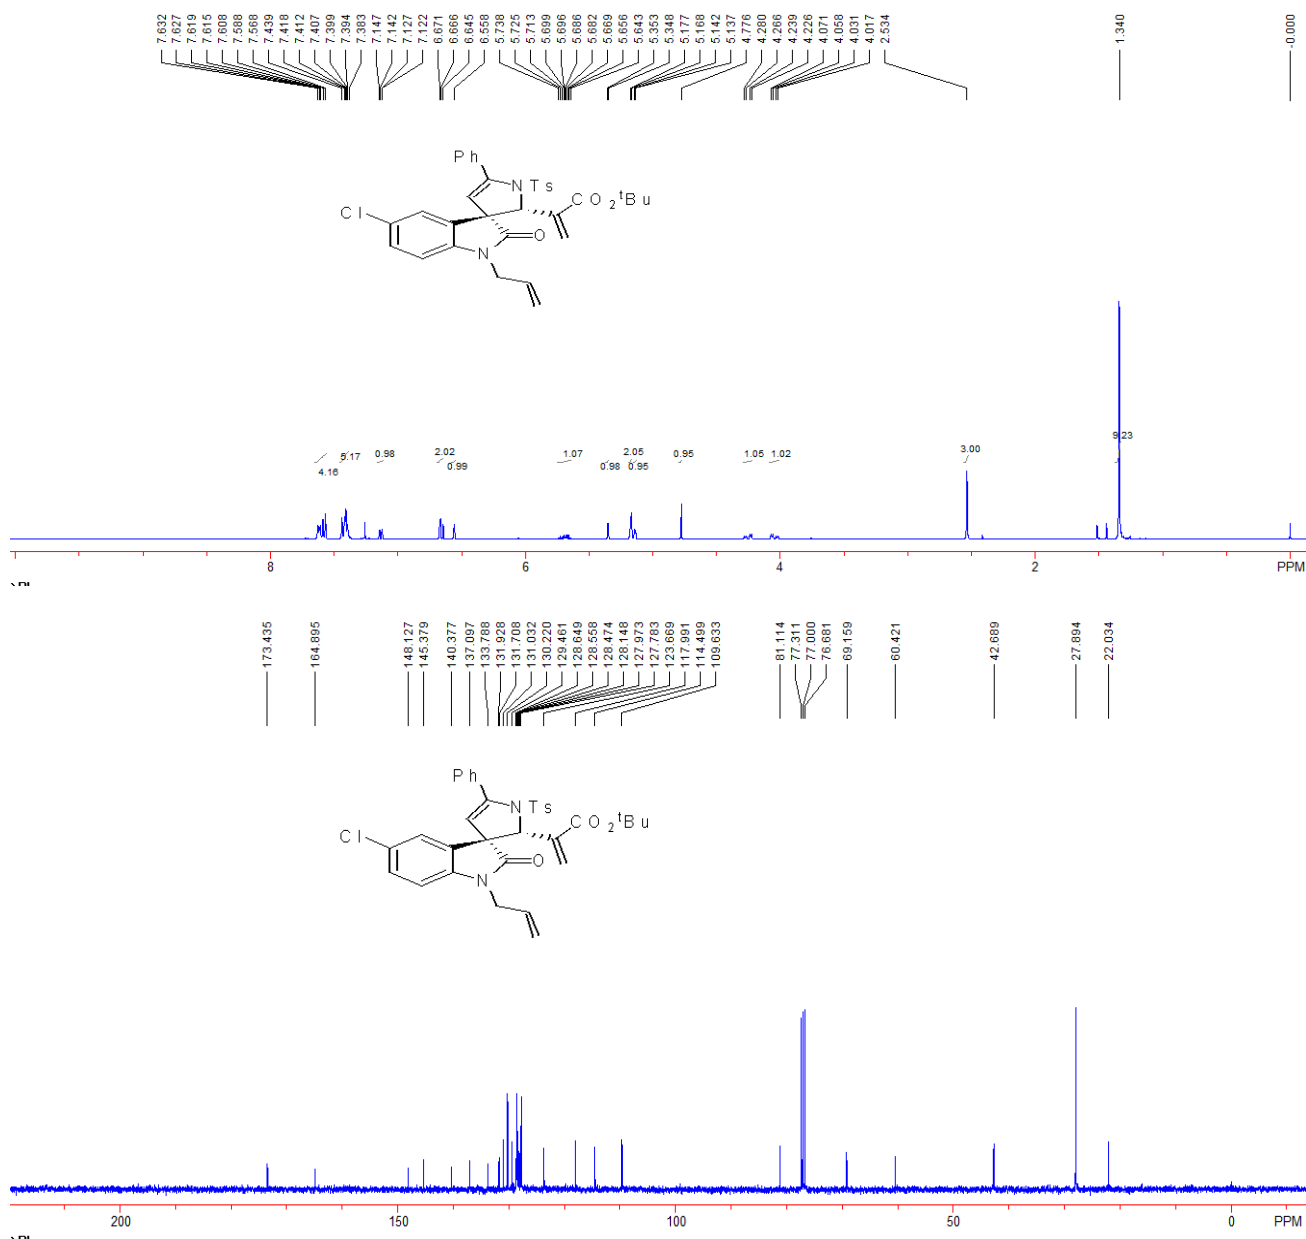

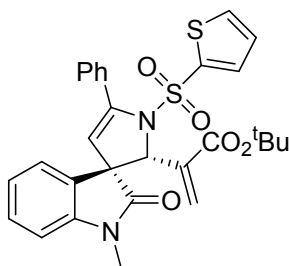

**Compound 3p:** A pale yellow solid, 92 mg, 84 yield; m.p. 152-153 °C;  $^1\text{H}$  NMR ( $\text{CDCl}_3$ , 400 MHz, TMS):  $\delta$  1.30 (s, 9H,  $3\text{CH}_3$ ), 3.07 (s, 3H,  $\text{CH}_3$ ), 4.89 (s, 1H, CH), 5.34 (s, 1H, =CH), 5.68 (d,  $J = 7.6$  Hz, 1H, Ar), 6.49 (s, 1H, = $\text{CH}_2$ ), 6.63 (s, 1H, = $\text{CH}_2$ ), 6.75 (d,  $J = 7.6$  Hz, 1H, Ar), 6.83 (dt,  $J_1 = 7.6$  Hz,  $J_2 = 0.8$  Hz, 1H, Ar), 7.20-7.24 (m, 2H, Ar), 7.36-7.39 (m, 3H, Ar), 7.47 (dd,  $J_1 = 4.0$  Hz,  $J_2 = 0.8$  Hz, 1H, Ar), 7.57-7.60 (m, 2H, Ar), 7.76 (dd,  $J_1 = 5.2$  Hz,  $J_2 = 1.6$  Hz, 1H, Ar);  $^{13}\text{C}$  NMR ( $\text{CDCl}_3$ , 100 MHz, TMS):  $\delta$  26.3, 27.7, 60.4, 69.6, 81.0, 107.7, 115.5, 122.7, 123.1, 127.1, 127.7, 127.9, 128.6, 128.7, 129.3, 131.6, 132.2, 133.3, 134.4, 136.3, 137.4, 142.6, 147.1, 164.5, 174.0; HRMS (ESI) Calcd. For  $\text{C}_{29}\text{H}_{29}\text{N}_2\text{O}_5\text{S}_2^+$  ( $\text{M}+\text{H}$ ) $^+$  requires 549.1512, Found: 549.1509; IR ( $\text{CH}_2\text{Cl}_2$ ):  $\nu$  668, 698, 732, 751, 849, 1149, 1169, 1368, 1467, 1489, 1610, 1712, 2971  $\text{cm}^{-1}$ .

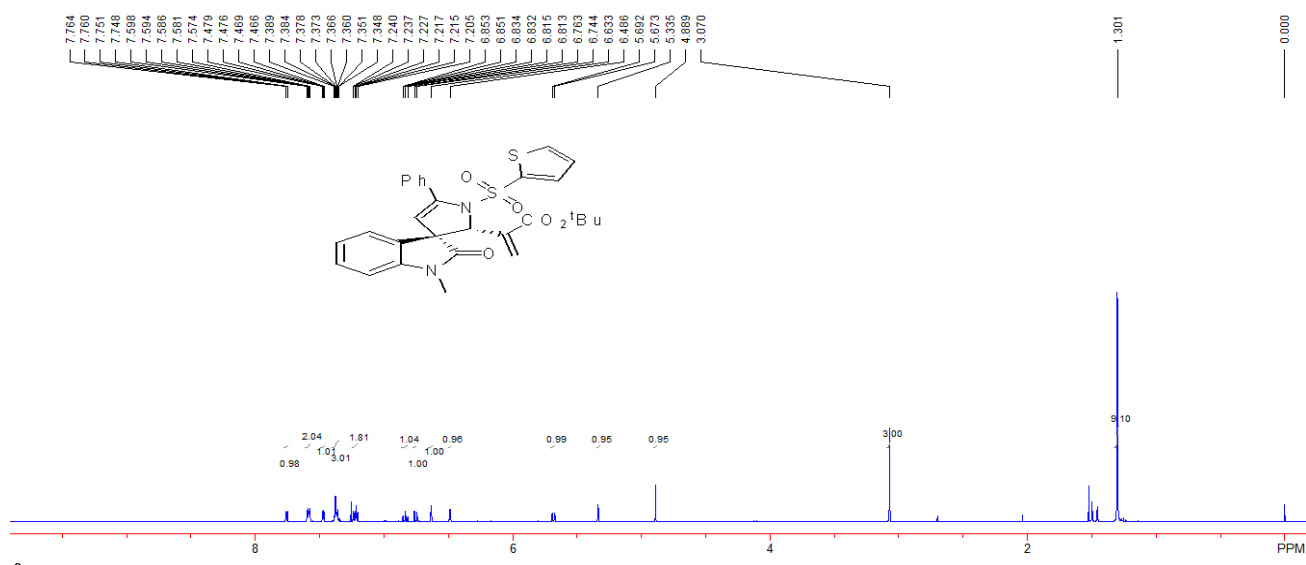

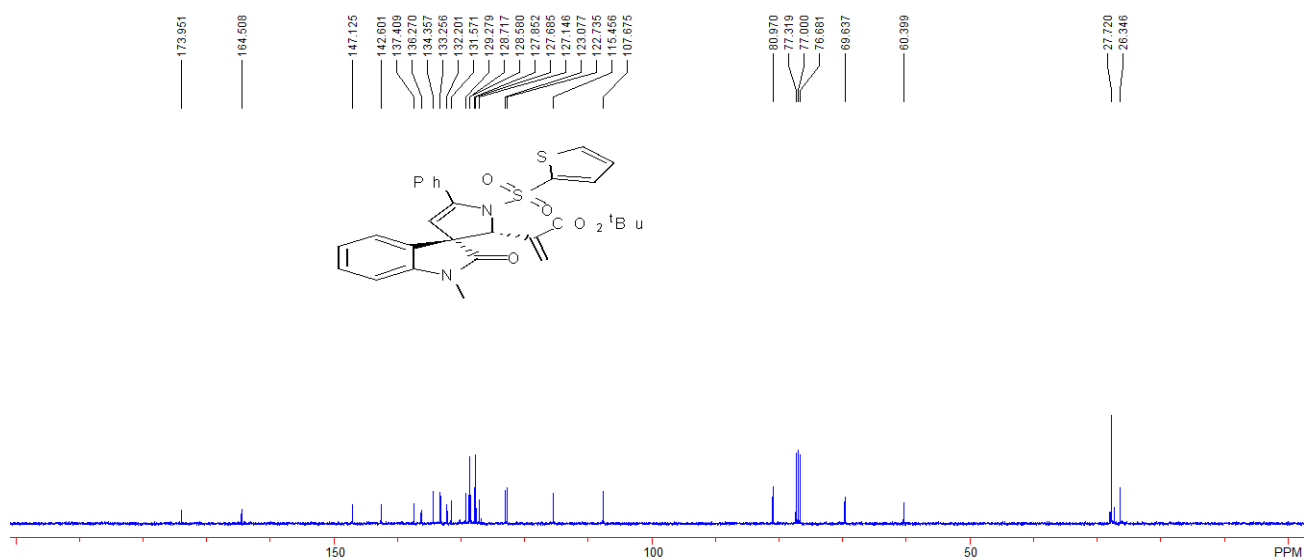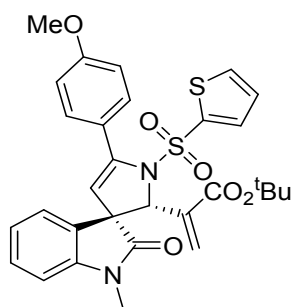

**Compound 3q:** A pale yellow solid, 93 mg, 80% yield; m.p. 196-197 °C;  $^1\text{H}$  NMR ( $\text{CDCl}_3$ , 400 MHz, TMS):  $\delta$  1.30 (s, 9H, 3 $\text{CH}_3$ ), 3.07 (s, 3H,  $\text{CH}_3$ ), 3.83 (s, 3H,  $\text{CH}_3$ ), 4.81 (s, 1H, CH), 5.31 (s, 1H, =CH), 5.64 (d,  $J = 8.8$  Hz, 1H, Ar), 6.47 (s, 1H, = $\text{CH}_2$ ), 6.63 (s, 1H, = $\text{CH}_2$ ), 6.75 (d,  $J = 8.0$  Hz, 1H, Ar), 6.82 (t,  $J = 7.2$  Hz, 1H, Ar), 6.89 (d,  $J = 8.4$  Hz, 2H, Ar), 7.21-7.25 (m, 2H, Ar), 7.48 (dd,  $J_1 = 4.0$  Hz,  $J_2 = 1.2$  Hz, 1H, Ar), 7.52 (d,  $J = 8.4$  Hz, 2H, Ar), 7.76 (dd,  $J_1 = 4.8$  Hz,  $J_2 = 1.2$  Hz, 1H, Ar);  $^{13}\text{C}$  NMR ( $\text{CDCl}_3$ , 100 MHz, TMS):  $\delta$  26.3, 27.7, 55.2, 60.2, 69.6, 80.9, 107.6, 113.1, 114.1, 122.7, 123.0, 123.8, 127.1, 127.8, 128.6, 130.1, 132.4, 133.2, 134.3, 136.4, 137.5, 142.6, 146.8, 160.3, 164.5, 174.1; HRMS (ESI) Calcd. For  $\text{C}_{30}\text{H}_{31}\text{N}_2\text{O}_6\text{S}_2^+$  ( $\text{M}+\text{H}$ ) $^+$  requires 579.1618, Found: 579.1615; IR ( $\text{CH}_2\text{Cl}_2$ ):  $\nu$  668, 680, 732, 837, 1030, 1082, 1148, 1168, 1250, 1366, 1467, 1510, 1609, 1714, 2924, 2954  $\text{cm}^{-1}$ .

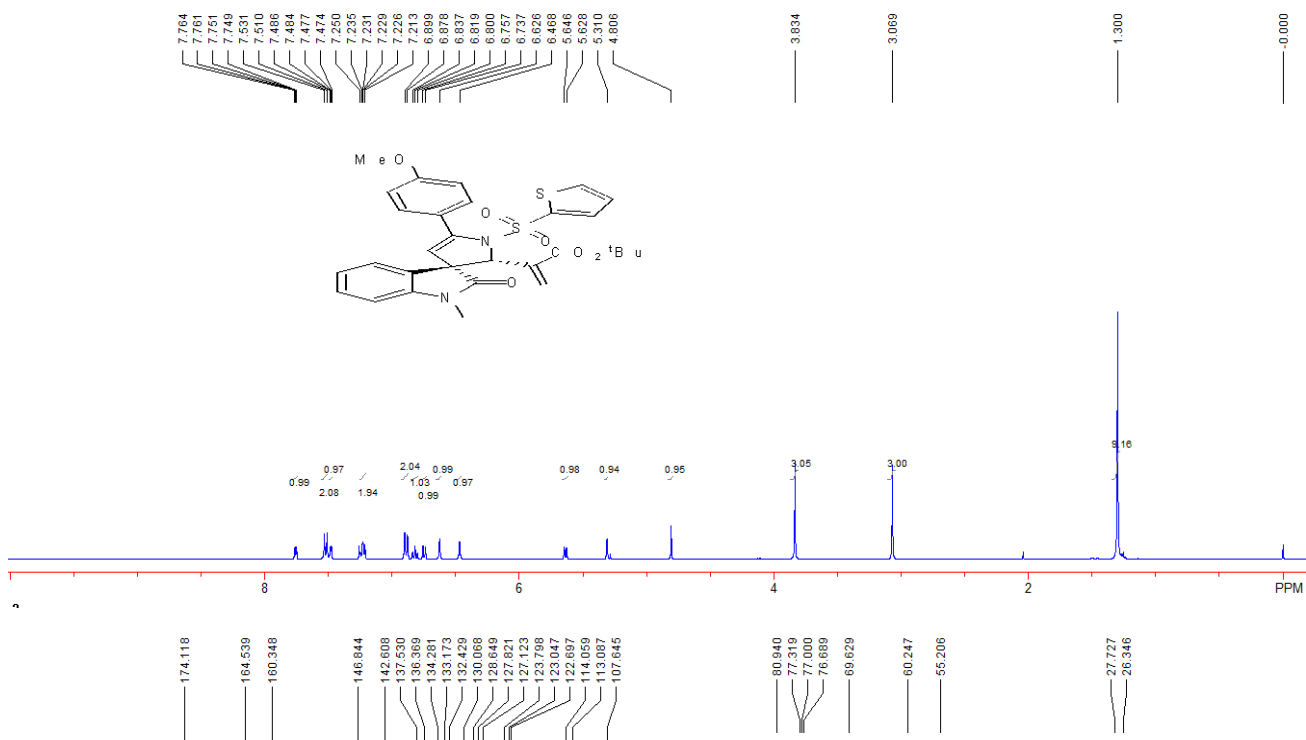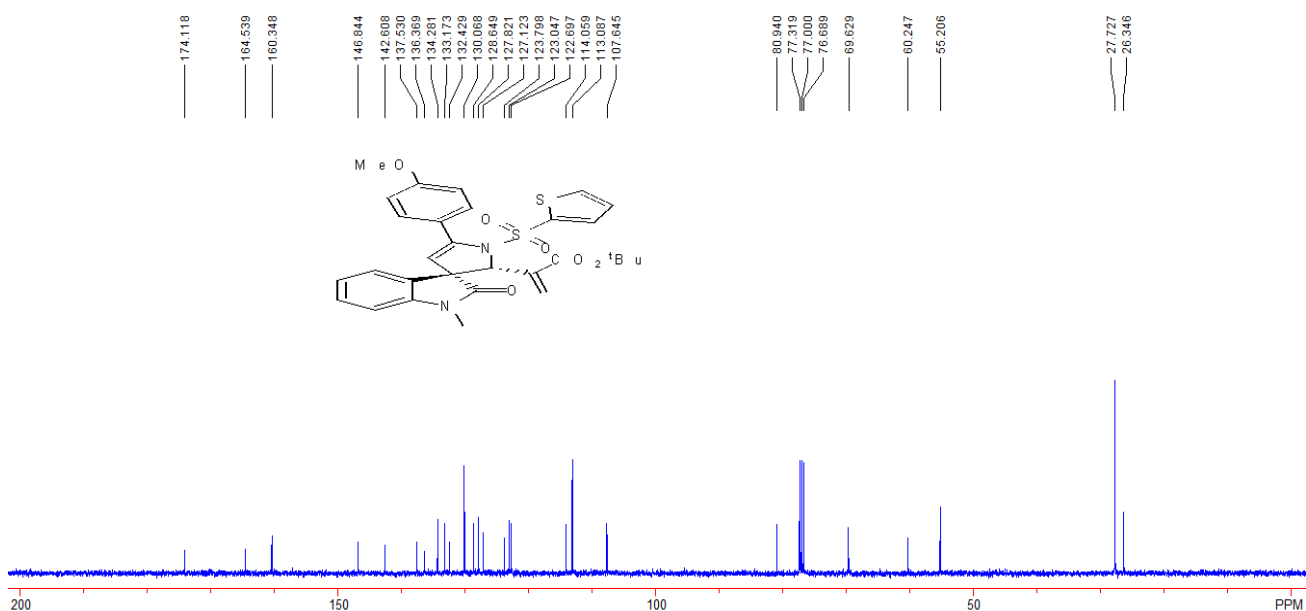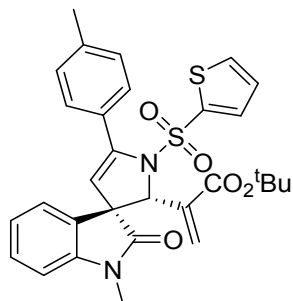

**Compound 3r:** A pale yellow solid, 85 mg, 76% yield; m.p. 117-118 °C; <sup>1</sup>H NMR (CDCl<sub>3</sub>, 400 MHz, TMS): δ 1.30 (s, 9H, 3CH<sub>3</sub>), 2.39 (s, 3H, CH<sub>3</sub>), 3.07 (s, 3H, CH<sub>3</sub>), 4.85 (s, 1H, CH), 5.30 (s,

1H, =CH), 5.60 (d,  $J = 7.2$  Hz, 1H, Ar), 6.49 (s, 1H, =CH<sub>2</sub>), 6.63 (s, 1H, =CH<sub>2</sub>), 6.75 (d,  $J = 8.0$  Hz, 1H, Ar), 6.82 (dt,  $J_1 = 8.0$  Hz,  $J_2 = 0.8$  Hz, 1H, Ar), 7.18 (d,  $J = 8.0$  Hz, 2H, Ar), 7.21-7.26 (m, 2H, Ar), 7.47-7.50 (m, 3H, Ar), 7.77 (dd,  $J_1 = 5.2$  Hz,  $J_2 = 1.2$  Hz, 1H, Ar); <sup>13</sup>C NMR (CDCl<sub>3</sub>, 100 MHz, TMS):  $\delta$  21.5, 26.4, 27.8, 60.4, 69.7, 81.0, 107.7, 114.8, 122.7, 123.1, 127.2, 127.9, 128.4, 128.6, 128.7, 132.4, 133.2, 134.3, 136.3, 137.5, 139.3, 142.6, 147.2, 164.6, 174.1; HRMS (ESI) Calcd. For C<sub>30</sub>H<sub>31</sub>N<sub>2</sub>O<sub>5</sub>S<sub>2</sub><sup>+</sup> (M+H)<sup>+</sup> requires 563.1669, Found: 563.1664; IR (CH<sub>2</sub>Cl<sub>2</sub>):  $\nu$  668, 680, 734, 814, 1020, 1035, 1083, 1149, 1169, 1256, 1367, 1470, 1491, 1610, 1715, 2971 cm<sup>-1</sup>.

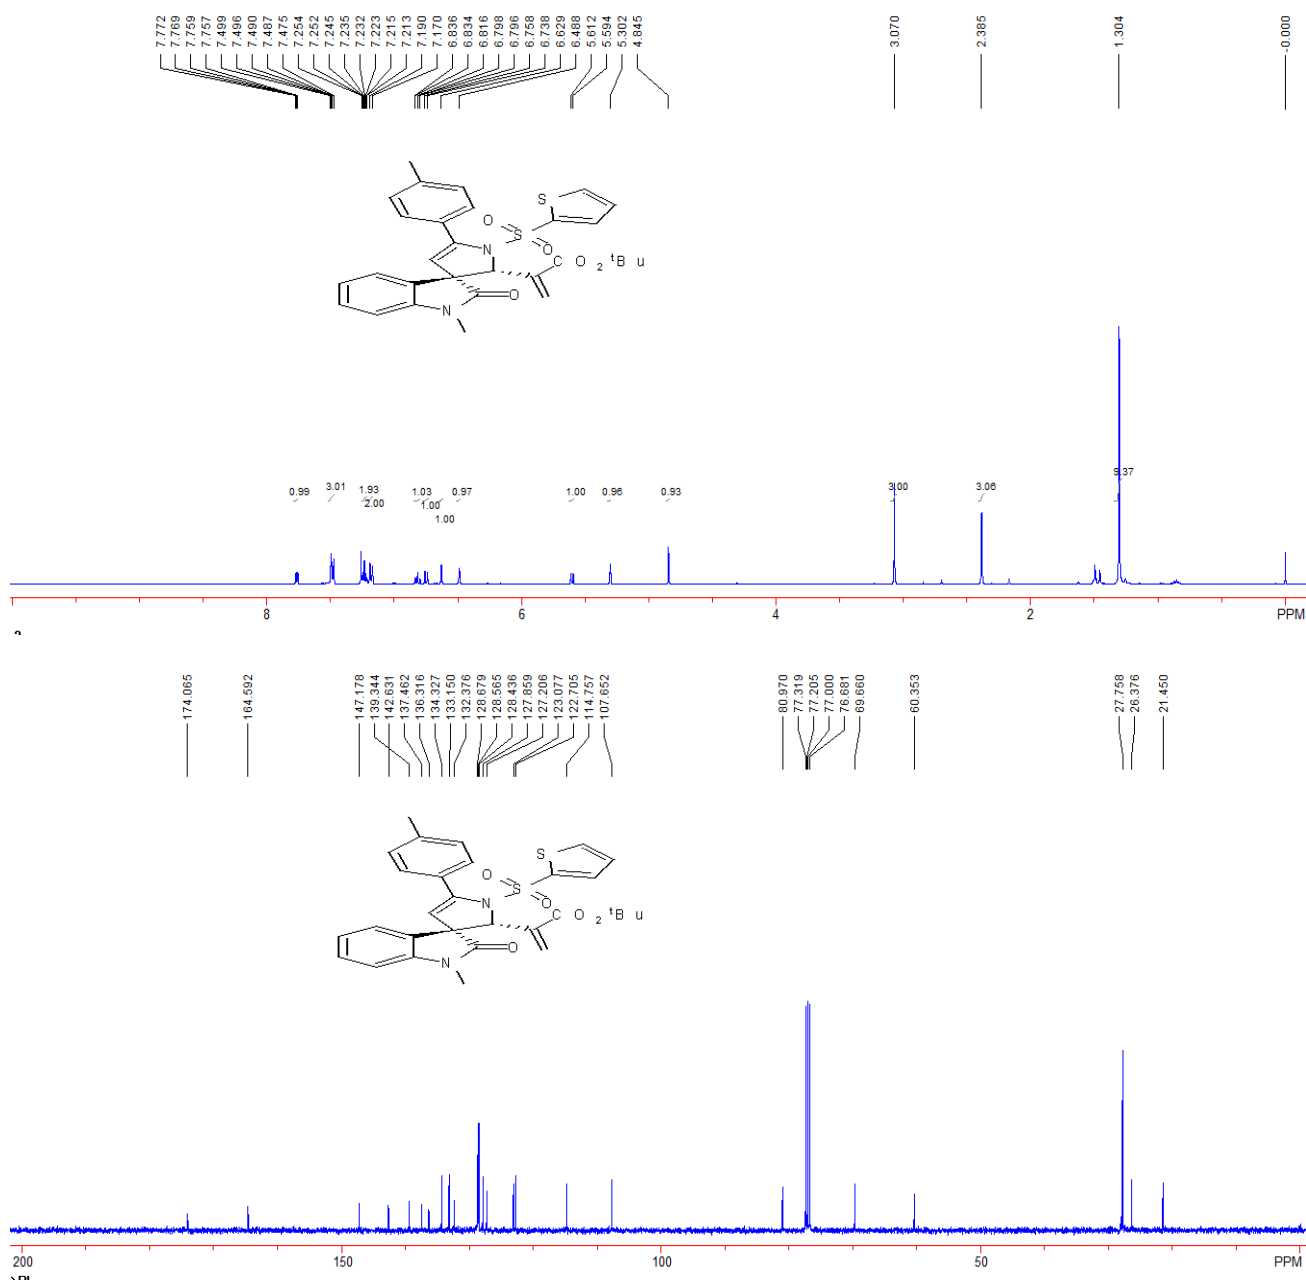

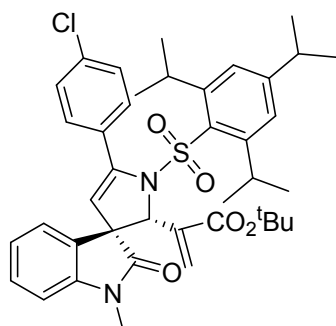

**Compound 3s:** A pale yellow solid, 116 mg, 83% yield; m.p. 124-125 °C;  $^1\text{H}$  NMR ( $\text{CDCl}_3$ , 400 MHz, TMS):  $\delta$  0.98 (s, 6H, 2 $\text{CH}_3$ ), 1.21-1.31 (m, 21H, 7 $\text{CH}_3$ ), 2.91-2.98 (m, 1H, CH), 3.09 (s, 3H,  $\text{CH}_3$ ), 3.74-3.81 (m, 2H, 2CH), 5.08 (s, 1H, CH), 5.58 (s, 1H, =CH), 6.36 (s, 1H, = $\text{CH}_2$ ), 6.65 (s, 1H, = $\text{CH}_2$ ), 6.77 (d,  $J = 7.6$  Hz, 2H, Ar), 6.85 (t,  $J = 7.6$  Hz, 1H, Ar), 7.15 (d,  $J = 8.0$  Hz, 4H, Ar), 7.24 (t,  $J = 8.0$  Hz, 1H, Ar), 7.34 (d,  $J = 8.4$  Hz, 2H, Ar);  $^{13}\text{C}$  NMR ( $\text{CDCl}_3$ , 100 MHz, TMS):  $\delta$  23.6, 23.8, 26.4, 27.7, 29.8, 34.3, 60.8, 67.9, 80.9, 107.6, 117.2, 122.8, 124.2, 127.3, 127.9, 128.6, 128.7, 130.6, 131.0, 131.8, 134.5, 136.8, 142.5, 147.1, 151.89, 151.92, 154.3, 164.5, 174.4; HRMS (ESI) Calcd. For  $\text{C}_{40}\text{H}_{48}\text{ClN}_2\text{O}_5\text{S}^+$  ( $\text{M}+\text{H}$ ) $^+$  requires 703.2967, Found: 703.2956; IR ( $\text{CH}_2\text{Cl}_2$ ):  $\nu$  660, 672, 736, 750, 1088, 1150, 1257, 1315, 1345, 1370, 1491, 1610, 1715, 2959  $\text{cm}^{-1}$ .

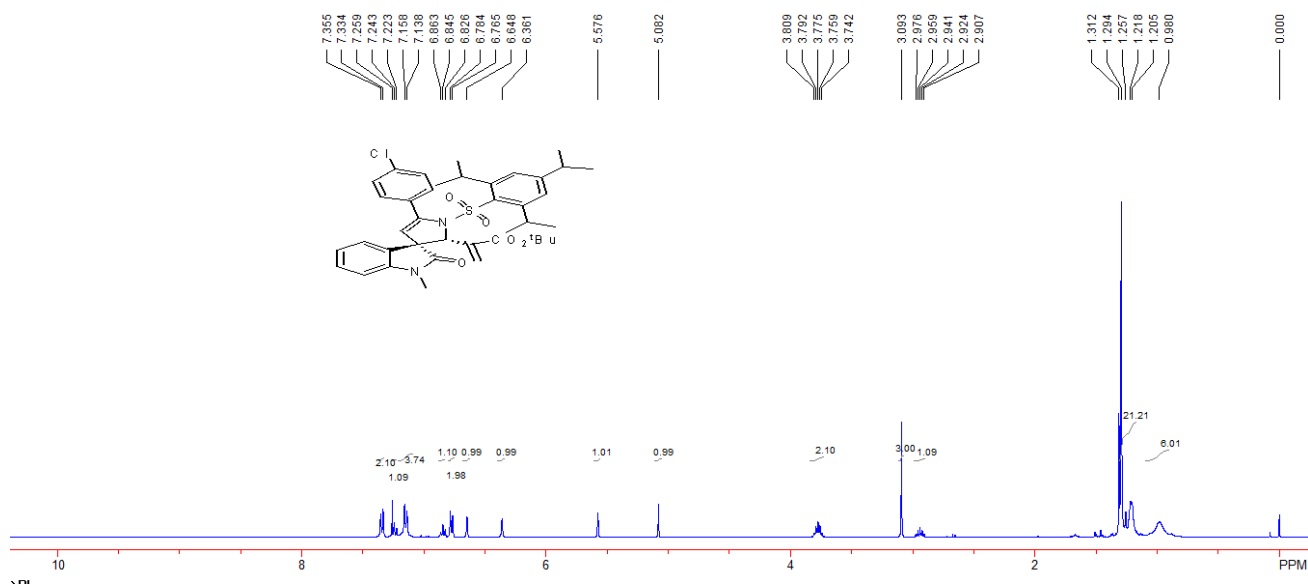



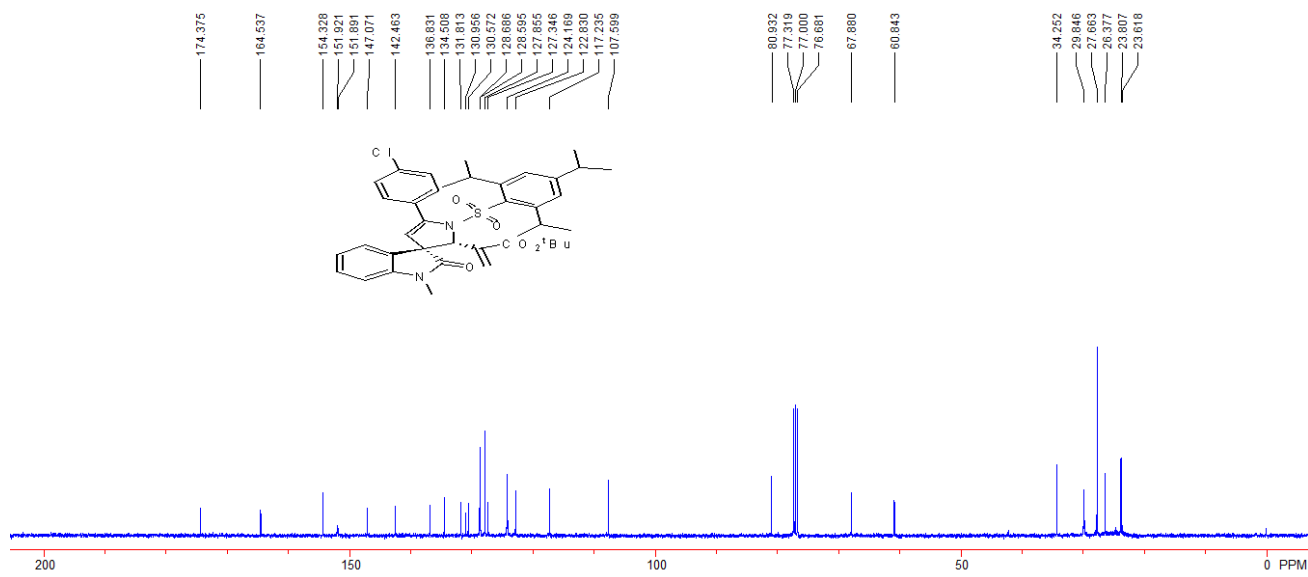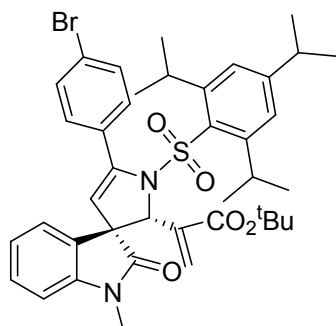

**Compound 3t:** A pale yellow solid, 122 mg, 82% yield; m.p. 130-131 °C;  $^1\text{H}$  NMR ( $\text{CDCl}_3$ , 400 MHz, TMS):  $\delta$  0.98 (s, 6H, 2 $\text{CH}_3$ ), 1.21-1.31 (m, 21H, 7 $\text{CH}_3$ ), 2.90-2.98 (m, 1H, CH), 3.09 (s, 3H,  $\text{CH}_3$ ), 3.74-3.81 (m, 2H, 2CH), 5.09 (s, 1H, CH), 5.59 (s, 1H, =CH), 6.35 (s, 1H, = $\text{CH}_2$ ), 6.65 (s, 1H, = $\text{CH}_2$ ), 6.76-6.88 (m, 3H, Ar), 7.22-7.29 (m, 7H, Ar);  $^{13}\text{C}$  NMR ( $\text{CDCl}_3$ , 100 MHz, TMS):  $\delta$  23.6, 23.8, 26.4, 27.7, 29.8, 34.3, 60.9, 67.9, 80.9, 107.6, 117.3, 122.8, 122.9, 124.2, 127.4, 128.6, 128.9, 130.8, 130.96, 131.01, 131.8, 136.8, 142.5, 147.1, 152.0, 154.4, 164.5, 174.4; HRMS (ESI) Calcd. For  $\text{C}_{40}\text{H}_{48}\text{BrN}_2\text{O}_5\text{S}^+$  ( $\text{M}+\text{H}$ ) $^+$  requires 747.2462, Found: 747.2453; IR ( $\text{CH}_2\text{Cl}_2$ ):  $\nu$  660, 735, 750, 818, 1009, 1150, 1171, 1370, 1610, 1715, 2951  $\text{cm}^{-1}$ .

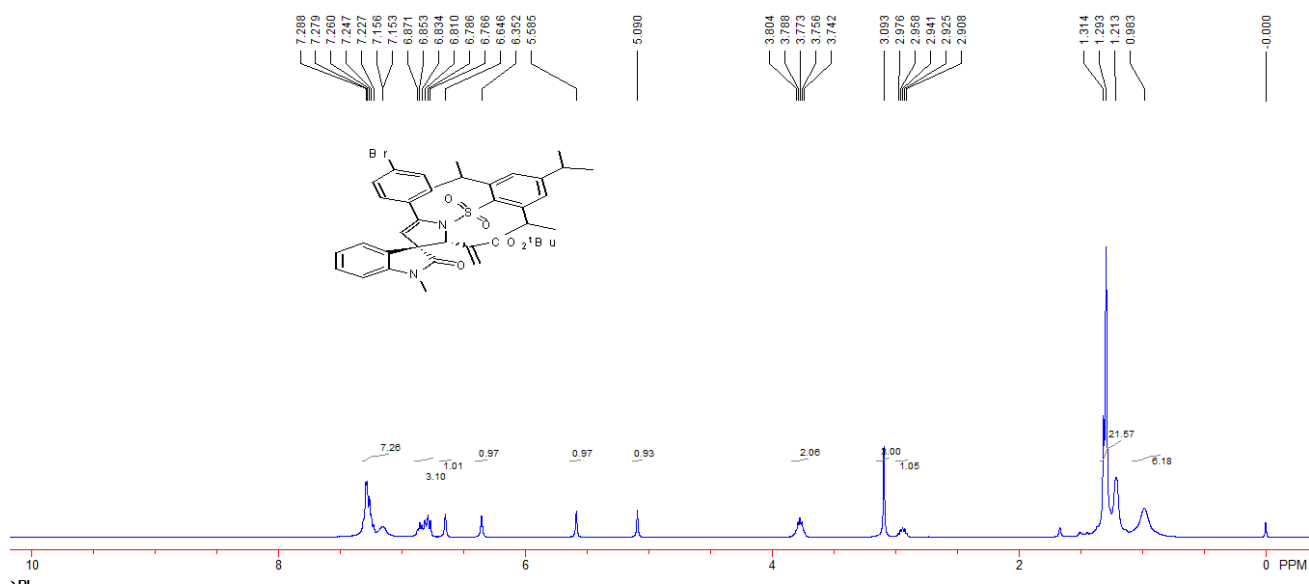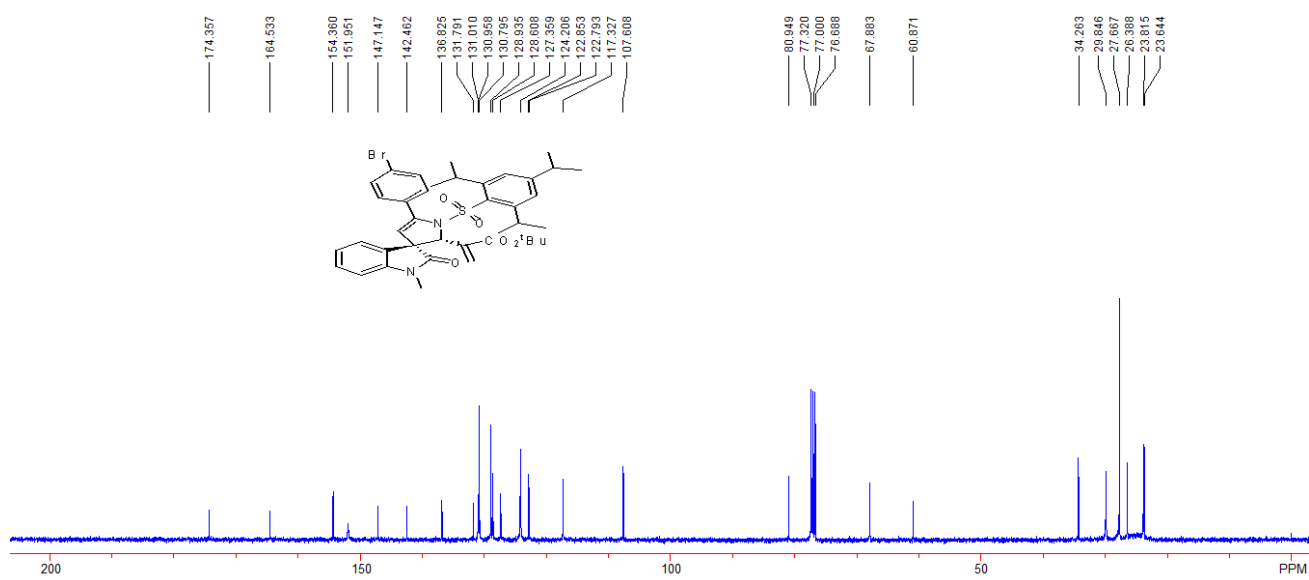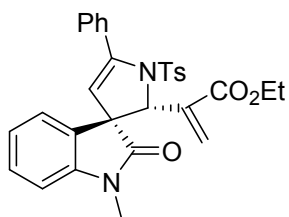

**Compound 3u:** A pale yellow solid, 88 mg, 85% yield; m.p. 98-99 °C;  $^1\text{H}$  NMR ( $\text{CDCl}_3$ , 400 MHz, TMS):  $\delta$  1.12 (t,  $J = 7.6$  Hz, 3H,  $\text{CH}_3$ ), 2.55 (s, 3H,  $\text{CH}_3$ ), 3.06 (s, 3H,  $\text{CH}_3$ ), 3.93-4.10 (m, 2H,  $\text{CH}_2$ ), 4.85 (s, 1H, CH), 5.24 (s, 1H, =CH), 5.54 (d,  $J = 7.2$  Hz, 1H, Ar), 6.55 (s, 1H, = $\text{CH}_2$ ), 6.69-6.75 (m, 3H, = $\text{CH}_2$ , Ar), 7.22 (t,  $J = 7.6$  Hz, 1H, Ar), 7.34-7.40 (m, 5H, Ar), 7.53-7.57 (m, 4H, Ar);  $^{13}\text{C}$  NMR

(CDCl<sub>3</sub>, 100 MHz, TMS):  $\delta$  13.9, 21.7, 26.3, 60.4, 60.8, 69.5, 107.4, 115.0, 122.5, 123.3, 127.8, 127.9, 128.6, 128.7, 128.8, 129.3, 130.0, 131.8, 132.3, 133.0, 136.4, 142.5, 144.6, 147.7, 165.7, 174.4; HRMS (ESI) Calcd. For C<sub>30</sub>H<sub>29</sub>N<sub>2</sub>O<sub>5</sub>S<sup>+</sup> (M+H)<sup>+</sup> requires 529.1792, Found: 529.1791; IR (CH<sub>2</sub>Cl<sub>2</sub>):  $\nu$  662, 735, 752, 816, 1031, 1086, 1170, 1261, 1304, 1349, 1364, 1470, 1491, 1610, 1716, 2923 cm<sup>-1</sup>.

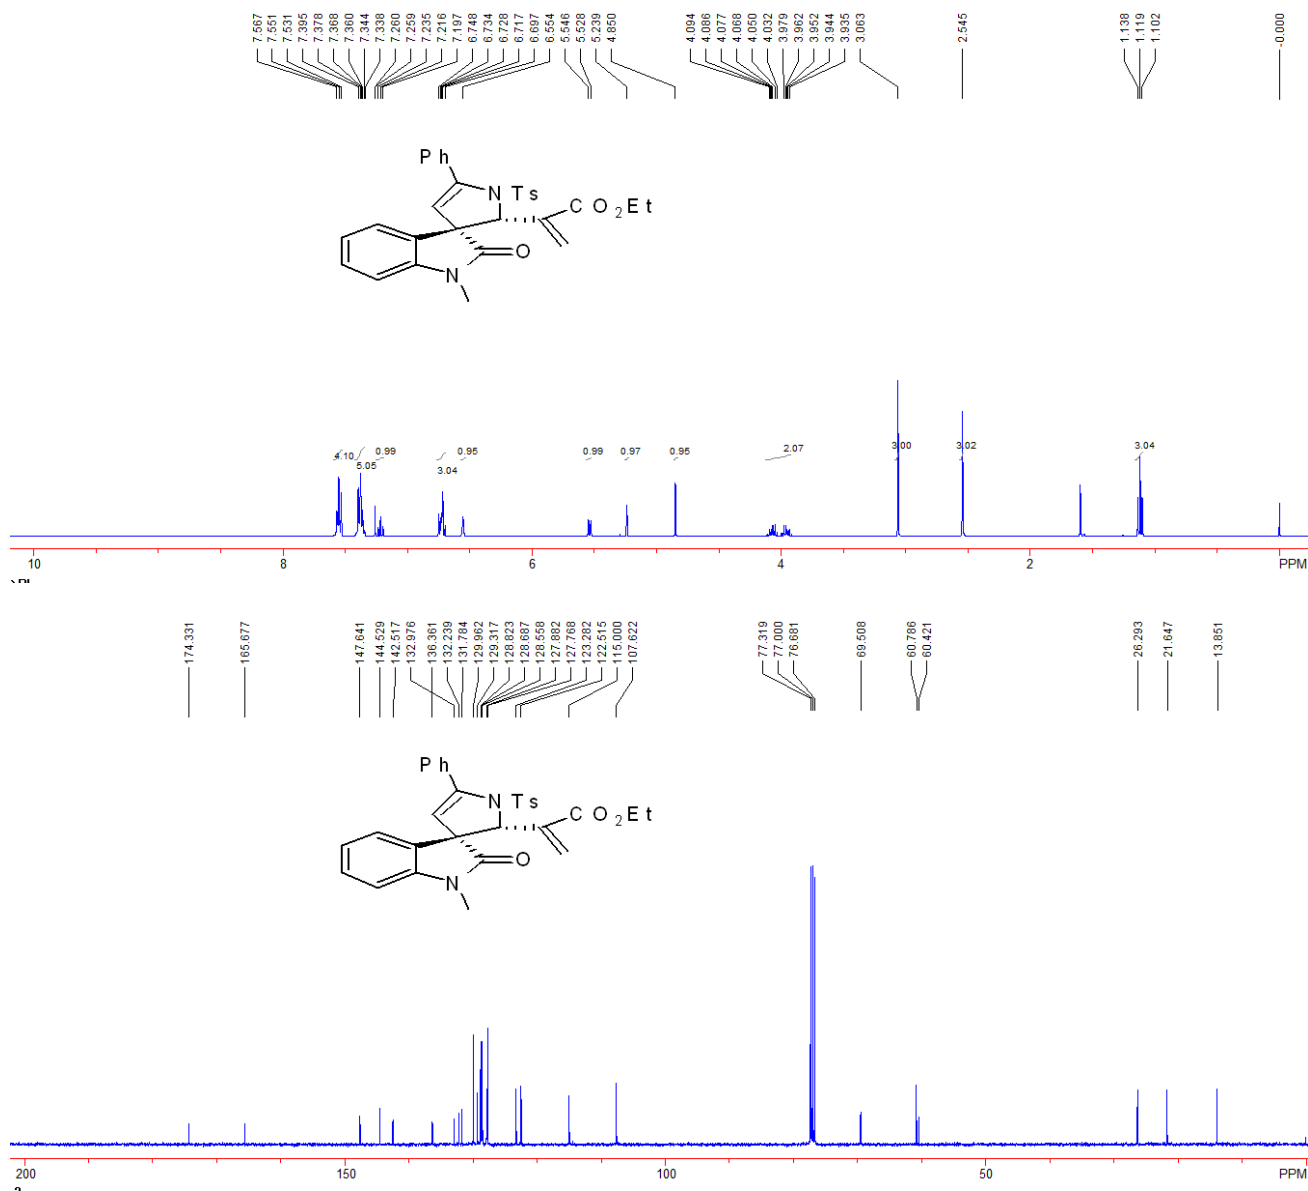

## 4. X-ray Data of 3t and 3u

### X-ray Data of 3t

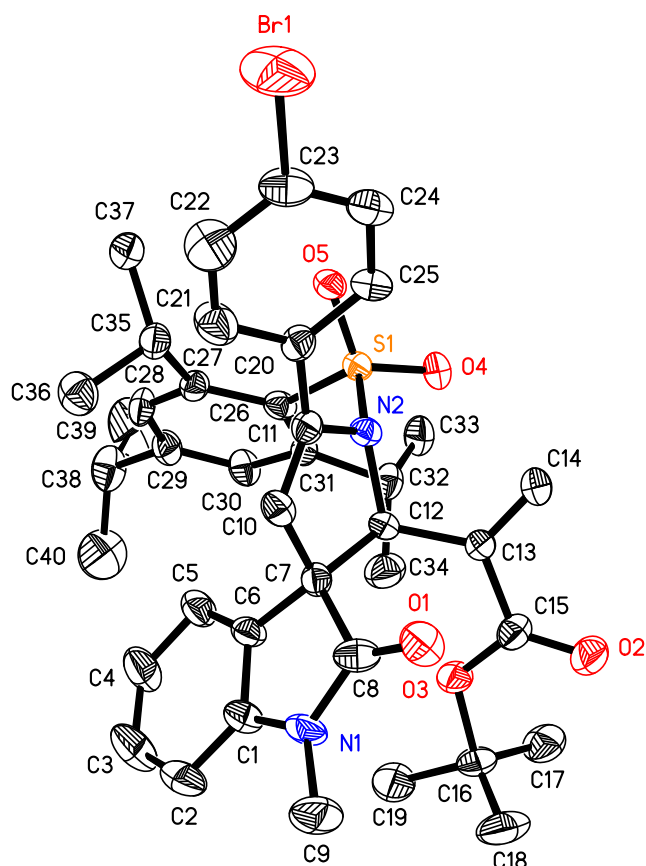

The crystal data of **3t** have been deposited in CCDC with number 1024783. Empirical Formula:  $C_{41}H_{49}BrCl_2N_2O_5S$ ; Formula Weight: 832.69; Crystal Color, Habit: colorless; Crystal Dimensions: 0.211 x 0.123 x 0.106 mm<sup>3</sup>; Crystal System: Orthorhombic; Lattice Parameters:  $a = 29.462(4)$  Å,  $\alpha = 90$  deg.  $b = 12.7234(15)$  Å,  $\beta = 90$  deg.  $c = 11.2553(14)$  Å,  $\gamma = 90$  deg;  $V = 4219.2(9)$  Å<sup>3</sup>; Space group:  $Pca2_1$ ;  $Z = 4$ ;  $D_{calc} = 1.311$  g/cm<sup>3</sup>;  $F_{000} = 1736$ ; Diffractometer: Rigaku AFC7R; Residuals:  $R; R_w$ : 0.0662, 0.1523.

## X-ray Data of **3u**

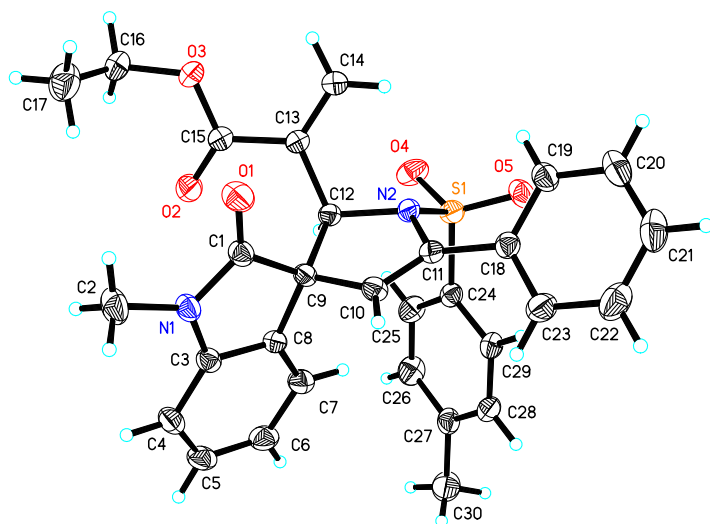

The crystal data of **3u** have been deposited in CCDC with number 1019412. Empirical Formula:  $C_{30}H_{28}N_2O_4S$ ; Formula Weight: 528.60; Crystal Color, Habit: colorless; Crystal Dimensions: 0.320 x 0.220 x 0.20 mm<sup>3</sup>; Crystal System: Monoclinic; Lattice Parameters:  $a = 13.2726(8)$  Å,  $\alpha = 90$  deg.  $b = 14.2499(8)$  Å,  $\beta = 98.9150(10)$  deg.  $c = 13.8765(8)$  Å,  $\gamma = 90$  deg;  $V = 2592.8(3)$  Å<sup>3</sup>; Space group: P 21/n;  $Z = 4$ ;  $D_{calc} = 1.354$  g/cm<sup>3</sup>;  $F_{000} = 1112$ ; Diffractometer: Rigaku AFC7R; Residuals:  $R; R_w: 0.0480, 0.1222$ .

## 5. Synthesis of Chiral Organophosphane Catalyst CP.

Chiral organophosphane catalyst **CP** were prepared according to a procedure in the previous literature.<sup>2</sup>

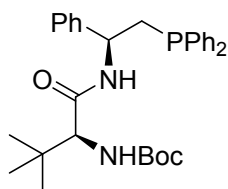

**Chiral Organophosphane Catalyst CP:** A white solid; m. p. 65-67 °C; <sup>1</sup>H NMR (CDCl<sub>3</sub>, 400 MHz, TMS): δ 1.01 (s, 9H, 3CH<sub>3</sub>), 1.41 (s, 9H, 3CH<sub>3</sub>), 2.49-2.63 (m, 2H, CH<sub>2</sub>), 3.77 (br, 1H, NH), 4.84-4.88 (m, 1H, CH), 5.15 (br, 1H, NH), 6.29 (br, 1H, CH), 7.19-7.40 (m, 15H, Ar); <sup>31</sup>P NMR (CDCl<sub>3</sub>, 161.94 MHz, 85% H<sub>3</sub>PO<sub>4</sub>): δ -24.30; IR (CH<sub>2</sub>Cl<sub>2</sub>) ν 696, 739, 802, 1013, 1048, 1067, 1170, 1245, 1366, 1391, 1434, 1455, 1495, 1652, 1699, 2964, 3053, 3324 cm<sup>-1</sup>. HRMS (ESI) calcd. for C<sub>31</sub>H<sub>40</sub>N<sub>2</sub>O<sub>3</sub>P<sup>+</sup> (M+H)<sup>+</sup> requires: 519.2771, Found: 519.2784; [α]<sub>D</sub><sup>20</sup> = +12.8 (c 1.0, CH<sub>2</sub>Cl<sub>2</sub>).

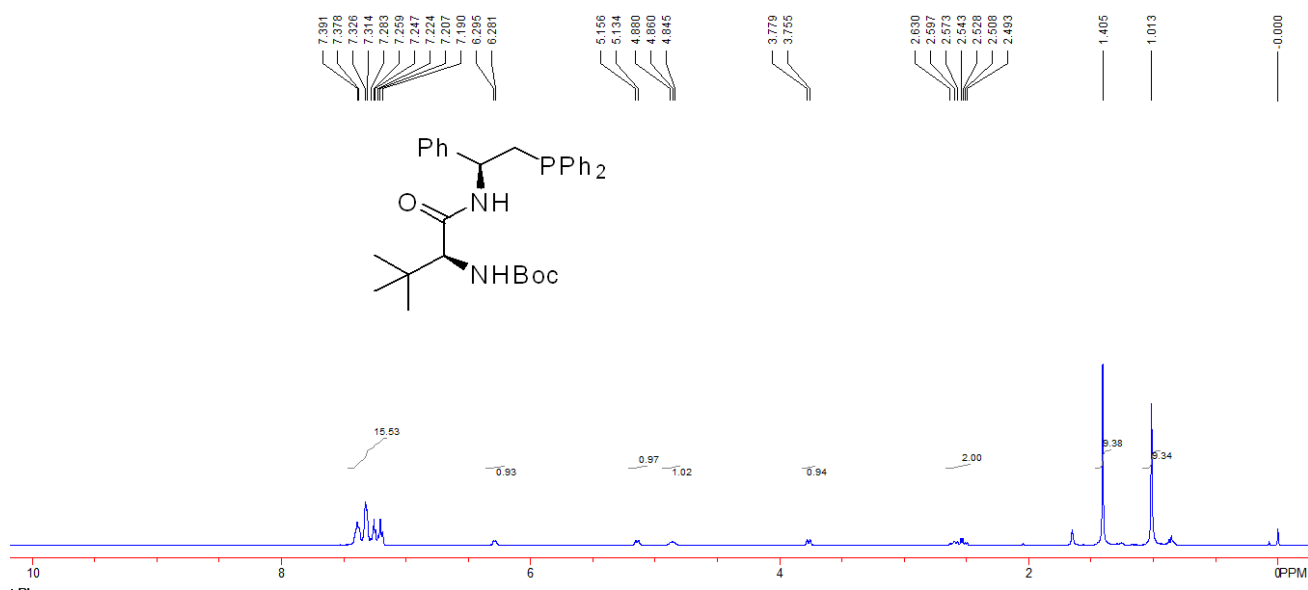

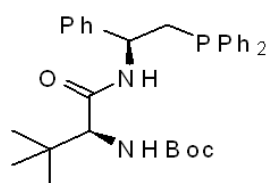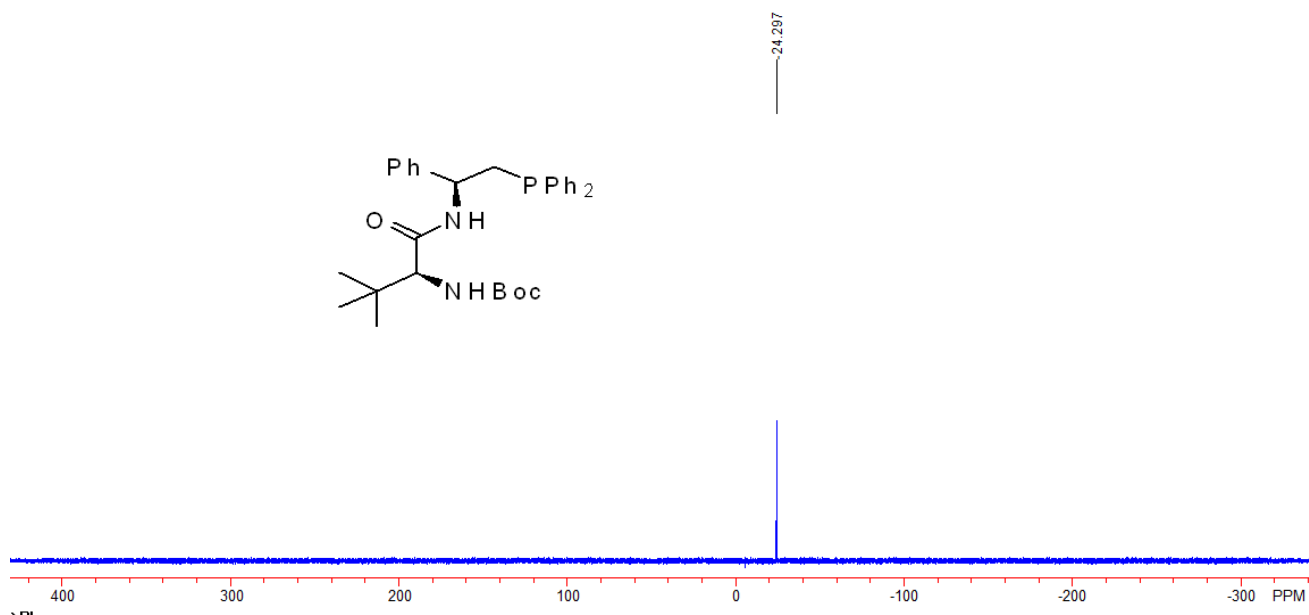

## 6. Copies of Chiral HPLC Data of Product 3a.

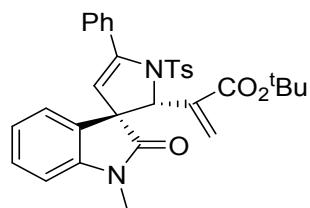

Chiral HPLC report: Enantiomeric excess was determined by HPLC with a Chiralcel AD-H column [ $\lambda = 254 \text{ nm}$ ; eluent: Hexane/Isopropanol = 80/20; Flow rate: 0.60 mL/min;  $t_{minor} = 32.55 \text{ min}$ ,  $t_{major} = 36.69 \text{ min}$ ;  $ee\% = 61\%$ ;  $[\alpha]_D^{20} = +63.6$  (c 1.0,  $\text{CH}_2\text{Cl}_2$ )].

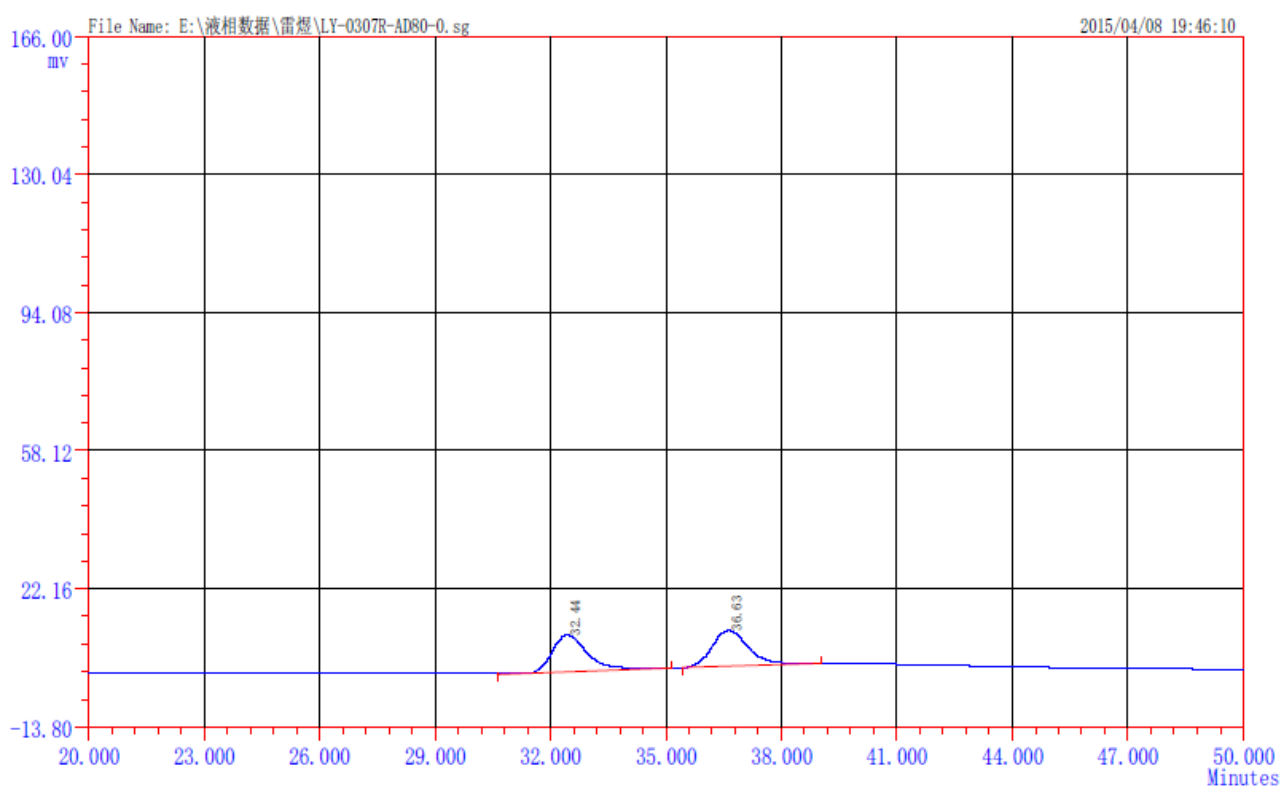

| ID         | 组分名 | 保留时间   | 峰高    | 峰面积       | 浓度       | 拖尾因子 | 理论塔板 |
|------------|-----|--------|-------|-----------|----------|------|------|
| 1          |     | 32.443 | 9549  | 609980.4  | 49.7186  | 2.28 | 5141 |
| 2          |     | 36.632 | 9359  | 616886.2  | 50.2814  | 1.91 | 6156 |
| $\Sigma$ : |     |        | 18908 | 1226866.6 | 100.0000 |      |      |

| NO.   | R. Time | Peak Height | Pead Area | Percent  |
|-------|---------|-------------|-----------|----------|
| 1     | 32.443  | 9549        | 609980.4  | 49.7186  |
| 2     | 36.632  | 9359        | 616886.2  | 50.2814  |
| Total |         | 18908       | 1226866.6 | 100.0000 |



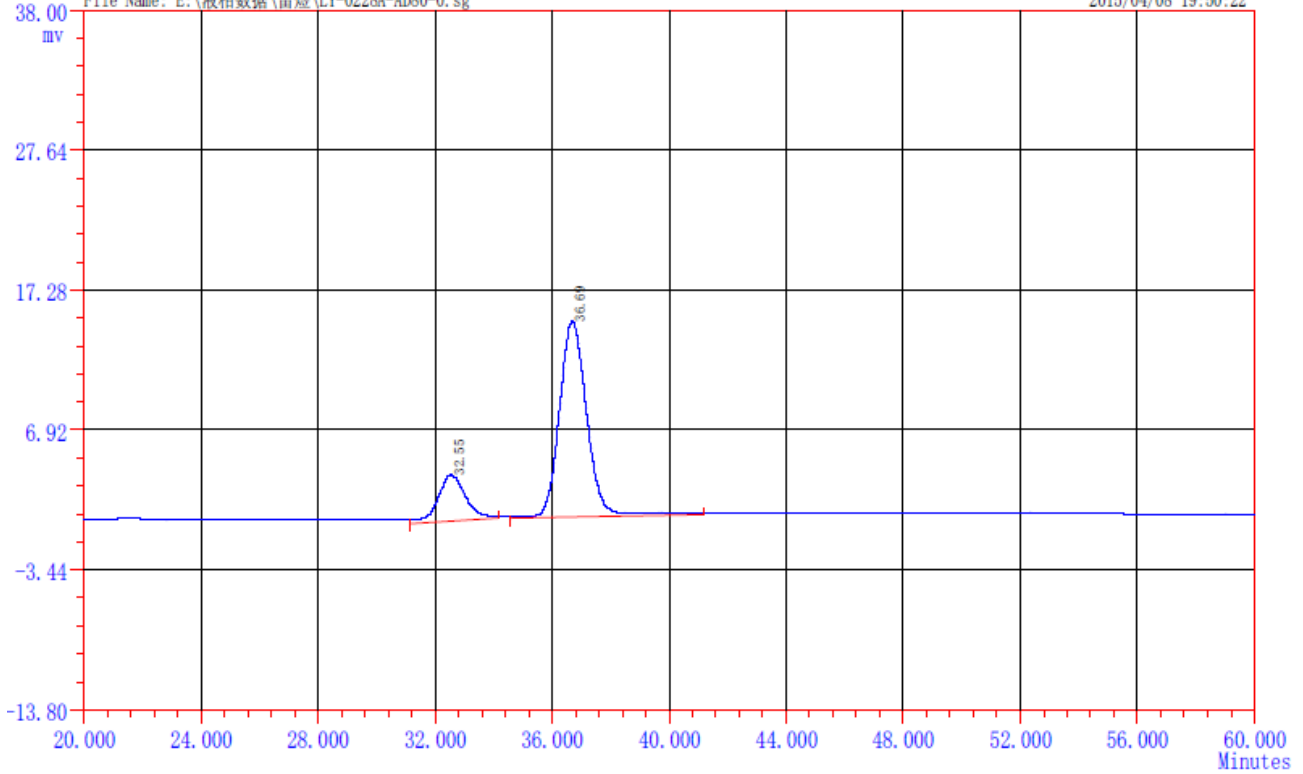

| ID | 组分名 | 保留时间   | 峰高    | 峰面积       | 浓度       | 拖尾因子 | 理论塔板 |
|----|-----|--------|-------|-----------|----------|------|------|
| 1  |     | 32.550 | 3435  | 229096.1  | 19.2840  | 1.33 | 4747 |
| 2  |     | 36.693 | 14474 | 958913.4  | 80.7160  | 1.13 | 6114 |
| Σ: |     |        | 17909 | 1188009.5 | 100.0000 |      |      |

| NO.   | R. Time | Peak Height | Pead Area | Percent  |
|-------|---------|-------------|-----------|----------|
| 1     | 32.550  | 3435        | 229096.1  | 19.2840  |
| 2     | 36.693  | 14474       | 958913.4  | 80.7160  |
| Total |         | 17909       | 1188009.5 | 100.0000 |

## 7. Reference

1. a) Z. Shi, Q. Tong, W. W. Y. Leong, G. Zhong, *Chem.-Eur. J.* 2012, **18**, 9802; b) K. Jiang, B. Tiwari, Y. R. Chi, *Org. Lett.* 2012, **14**, 2382; c) C. Sima, T. Lebl, A. M. Z. Slawin, A. D. Smith, *Angew. Chem. Int. Ed.* 2012, **51**, 3653.
2. H.-P. Deng, Y. Wei, M. Shi, *Adv. Synth. Catal.* 2012, **354**, 783.
